# Supplementary material
Source: PubMed Central journal article supplement (PMC7111328)
Supplement: mmc1.pdf [file mmc1.pdf]

S20111123-008

20111123

PROTON DMSO-D<sub>6</sub>: \nmr\_data ham

11.466

7.900  
7.895  
7.686  
7.681  
7.129  
7.108

3.314  
2.901  
2.514  
2.510  
2.506  
2.501  
2.497  
2.376  
2.365  
2.353  
2.146  
1.289

0.005

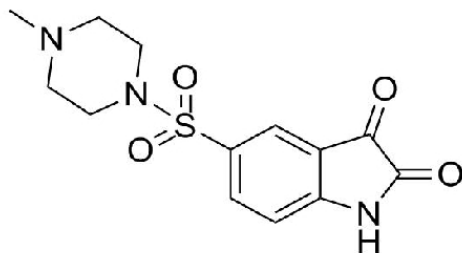

7a

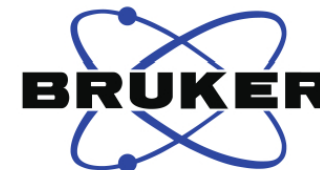

Current Data Parameters  
NAME ZHM-PAIQIN  
EXPNO 10  
PROCNO 1

F2 - Acquisition Parameters  
Date\_ 20111123  
Time 10.55  
INSTRUM spect  
PROBHD 5 mm PABBO BB-  
PULPROG zg30  
TD 65536  
SOLVENT DMSO  
NS 16  
DS 2  
SWH 8223.685 Hz  
FIDRES 0.125483 Hz  
AQ 3.9846387 sec  
RG 203  
DW 60.800 usec  
DE 6.50 usec  
TE 307.1 K  
D1 1.00000000 sec

==== CHANNEL f1 =====  
NUC1 1H  
P1 14.50 usec  
PLW1 12.85299969 W  
SFO1 400.1324710 MHz

F2 - Processing parameters  
SI 65536  
SF 400.1300000 MHz  
WDW EM  
SSB 0  
LB 0.30 Hz  
GB 0  
PC 1.00

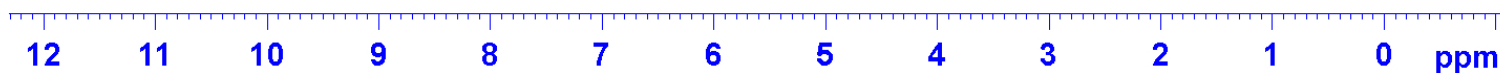

0.99

1.00  
1.12  
1.00

3.93  
4.05  
3.02

S20120305-010

20120305

PROTON DMSO-D:\nmr\_data ham

11.487  
7.961  
7.956  
7.940  
7.935  
7.725  
7.721  
7.145  
7.125  
7.062  
7.039  
7.018  
6.945  
6.934  
6.928  
6.922  
6.911  
3.495  
3.166  
3.155  
3.142  
3.042  
3.029  
3.019  
2.508  
2.503  
2.499  
0.001

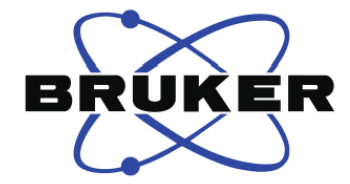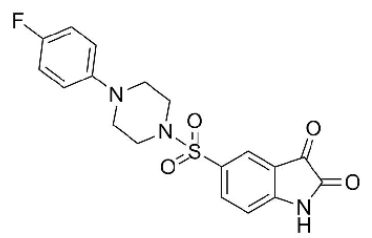

7b

Current Data Parameters  
NAME ZHM-4F  
EXPNO 10  
PROCNO 1

F2 - Acquisition Parameters  
Date\_ 20120305  
Time 10.43  
INSTRUM spect  
PROBHD 5 mm PABBO BB-  
PULPROG zg30  
TD 65536  
SOLVENT DMSO  
NS 16  
DS 2  
SWH 8223.685 Hz  
FIDRES 0.125483 Hz  
AQ 3.9846387 sec  
RG 203  
DW 60.800 usec  
DE 6.50 usec  
TE 298.0 K  
D1 1.00000000 sec

==== CHANNEL f1 =====  
NUC1 1H  
P1 14.50 usec  
PLW1 12.85299969 W  
SFO1 400.1324710 MHz

F2 - Processing parameters  
SI 65536  
SF 400.1300000 MHz  
WDW EM  
SSB 0  
LB 0.30 Hz  
GB 0  
PC 1.00

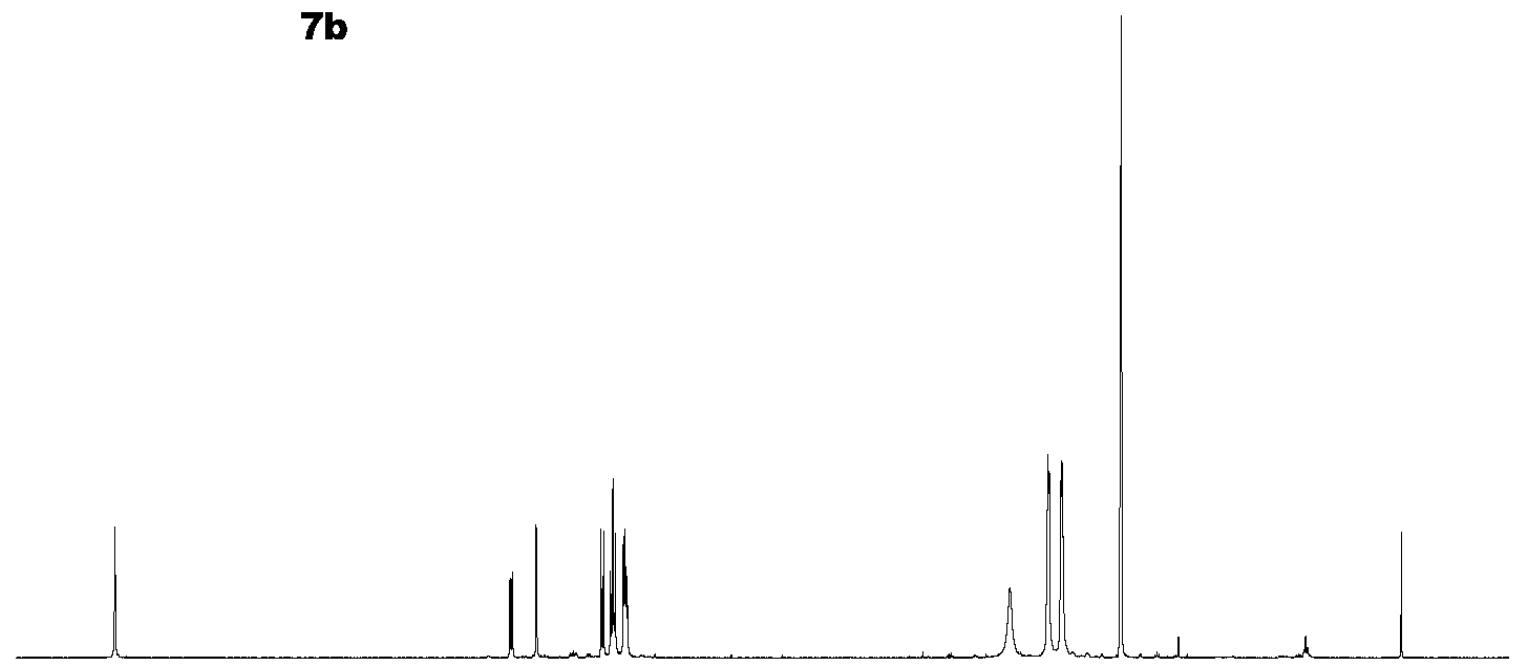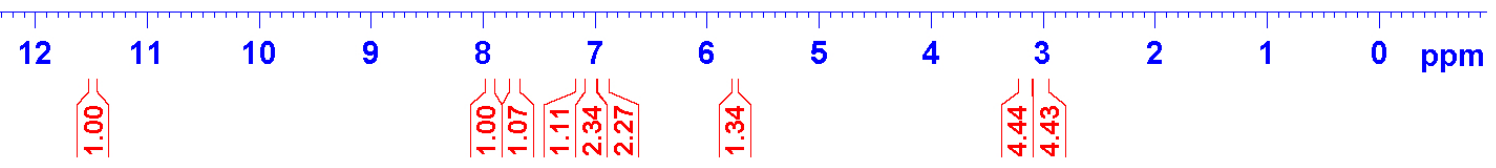

S20111207-033

20111207

PROTON DMSO D:\nmr\_data ham

11.477

7.968  
7.963  
7.947  
7.942  
7.730  
7.725  
7.430  
7.410  
7.390  
7.205  
7.184  
7.160  
7.144  
7.123  
7.101  
7.082

3.341  
3.330  
3.309  
3.057  
3.045  
3.034  
2.513  
2.509  
2.505  
2.500

0.004

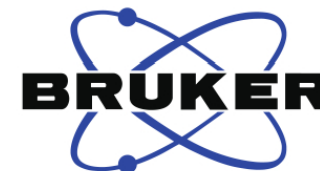

Current Data Parameters  
NAME ZHM-SANLVJIA  
EXPNO 10  
PROCNO 1

F2 - Acquisition Parameters  
Date\_ 20111207  
Time\_ 18.21  
INSTRUM spect  
PROBHD 5 mm PABBO BB-  
PULPROG zg30  
TD 65536  
SOLVENT DMSO  
NS 16  
DS 2  
SWH 8223.685 Hz  
FIDRES 0.125483 Hz  
AQ 3.9846387 sec  
RG 203  
DW 60.800 usec  
DE 6.50 usec  
TE 300.7 K  
D1 1.00000000 sec

==== CHANNEL f1 =====  
NUC1 1H  
P1 14.50 usec  
PLW1 12.85299969 W  
SFO1 400.1324710 MHz

F2 - Processing parameters  
SI 65536  
SF 400.1300000 MHz  
WDW EM  
SSB 0  
LB 0.30 Hz  
GB 0  
PC 1.00

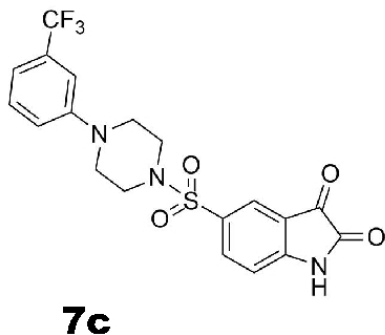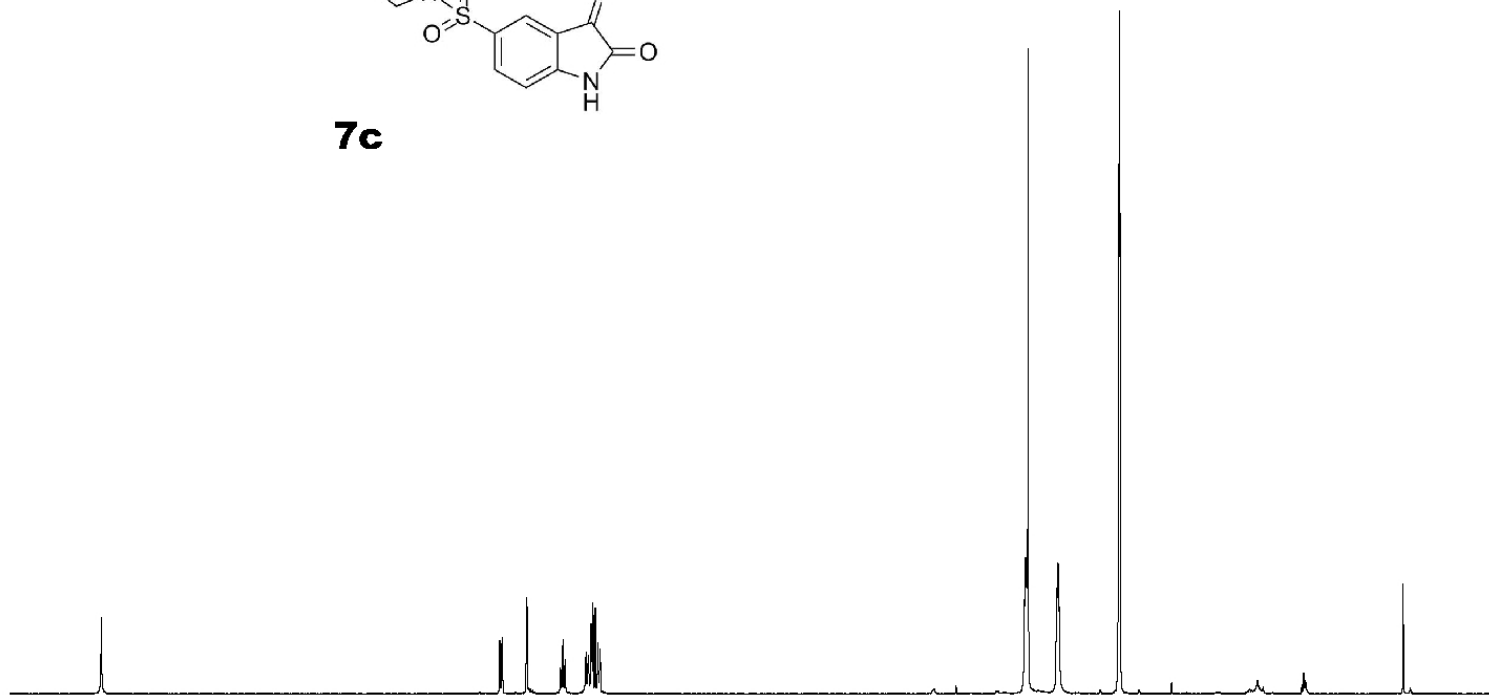

12 11 10 9 8 7 6 5 4 3 2 1 0 ppm

0.96

0.99

1.00

1.07

4.17

4.06

3.89

S20120419-005

20120419

PROTON DMSO d<sub>6</sub>: \nmr\_data ham

— 11.476

7.912  
7.907  
7.891  
7.886  
7.678  
7.674  
7.411  
7.399  
7.388  
7.374  
7.362  
7.280  
7.269  
7.263  
7.258  
7.127  
7.106

— 3.561  
— 3.322  
— 2.910  
— 2.505

— 0.003

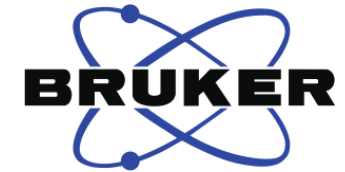

Current Data Parameters  
NAME ZHM-3CLBIAN  
EXPNO 10  
PROCNO 1

F2 - Acquisition Parameters  
Date\_ 20120419  
Time 10.16  
INSTRUM spect  
PROBHD 5 mm PABBO BB-  
PULPROG zg30  
TD 65536  
SOLVENT DMSO  
NS 16  
DS 2  
SWH 8223.685 Hz  
FIDRES 0.125483 Hz  
AQ 3.9846387 sec  
RG 203  
DW 60.800 usec  
DE 6.50 usec  
TE 298.0 K  
D1 1.00000000 sec

==== CHANNEL f1 =====  
NUC1 1H  
P1 14.50 usec  
PLW1 12.85299969 W  
SFO1 400.1324710 MHz

F2 - Processing parameters  
SI 65536  
SF 400.1300000 MHz  
WDW EM  
SSB 0  
LB 0.30 Hz  
GB 0  
PC 1.00

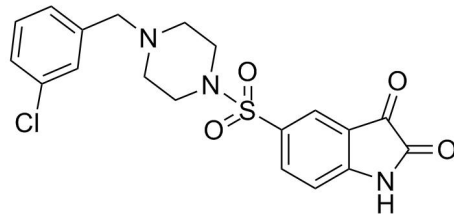

7d

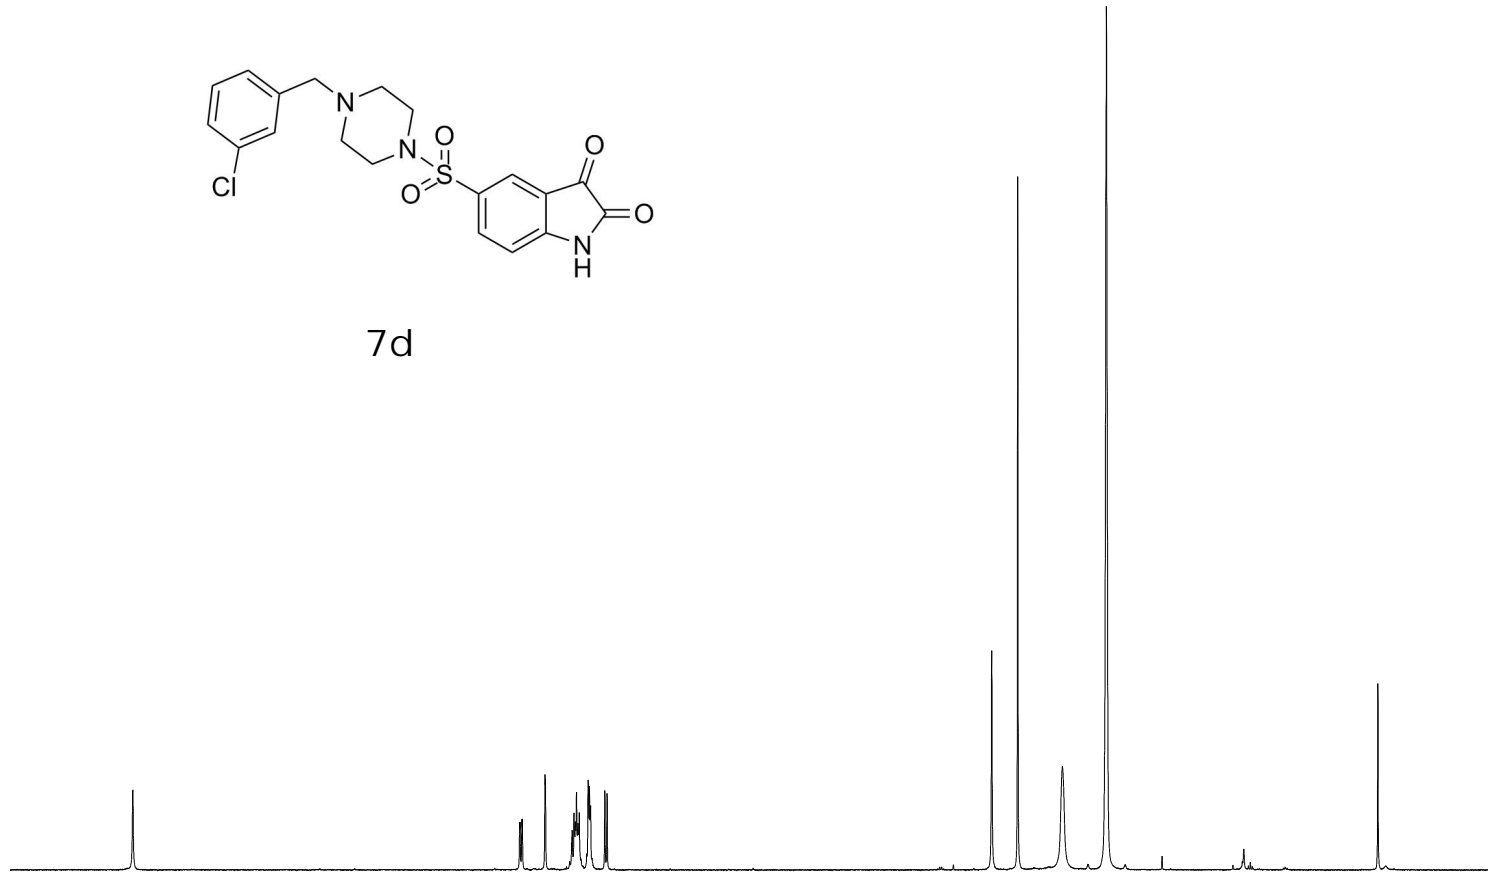

12 11 10 9 8 7 6 5 4 3 2 1 0 ppm

0.98

1.00  
0.99  
2.98  
2.11  
1.02

2.09  
3.86

S20120308-011

20120308

PROTON DMSO<sub>d</sub>: \nmr\_data ham

11.466  
7.902  
7.897  
7.881  
7.876  
7.669  
7.665  
7.117  
7.096  
6.889  
6.868  
6.722  
6.700

3.749  
3.709  
3.380  
3.319  
2.890  
2.508  
2.504  
2.433

0.003

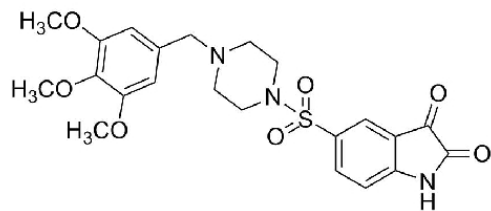

7e

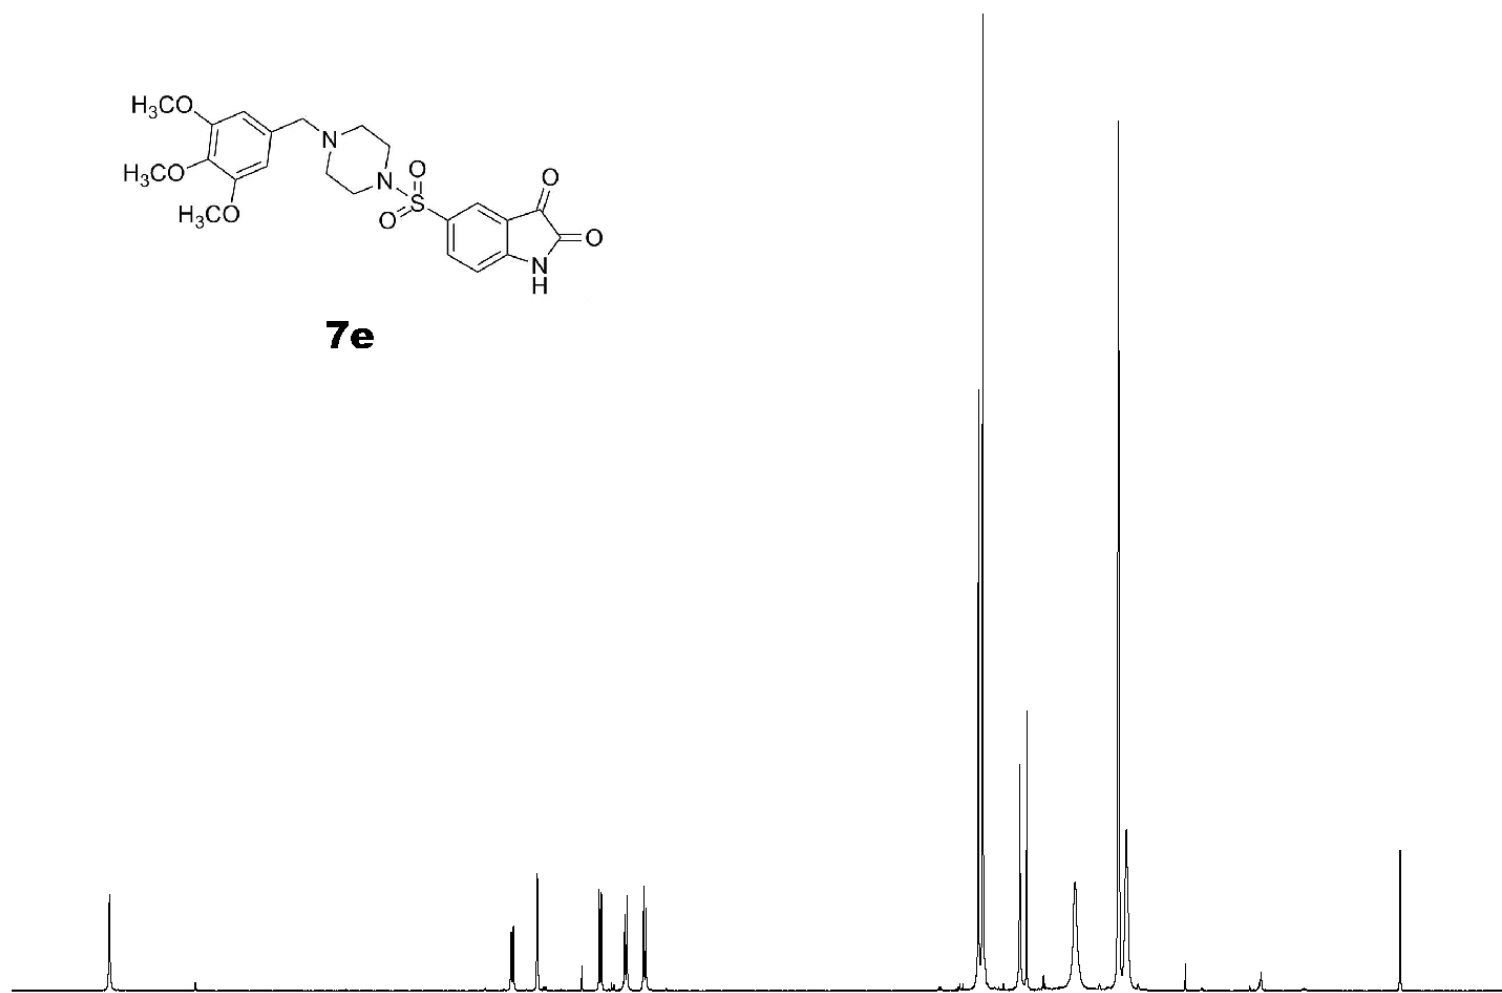

12 11 10 9 8 7 6 5 4 3 2 1 0 ppm

1.01

1.01

1.05

1.00

1.14

1.14

3.46

6.86

4.19

4.40

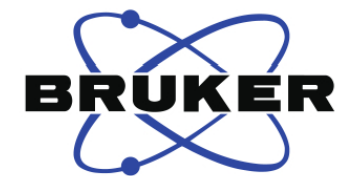

Current Data Parameters  
NAME ZHM-3DCH3  
EXPNO 10  
PROCNO 1

F2 - Acquisition Parameters  
Date\_ 20120308  
Time 12.46  
INSTRUM spect  
PROBHD 5 mm PABBO BB-  
PULPROG zg30  
TD 65536  
SOLVENT DMSO  
NS 16  
DS 2  
SWH 8223.685 Hz  
FIDRES 0.125483 Hz  
AQ 3.9846387 sec  
RG 203  
DW 60.800 usec  
DE 6.50 usec  
TE 298.0 K  
D1 1.00000000 sec

==== CHANNEL f1 =====  
NUC1 1H  
P1 14.50 usec  
PLW1 12.85299969 W  
SFO1 400.1324710 MHz

F2 - Processing parameters  
SI 65536  
SF 400.1300000 MHz  
WDW EM  
SSB 0  
LB 0.30 Hz  
GB 0  
PC 1.00

S20120315-005

20120315

PROTON Acetone D:\nmr data ham

8.021  
8.016  
8.000  
7.995  
7.839  
7.835  
7.298  
7.277  
7.247  
7.228  
7.209  
7.192  
7.156

3.029  
3.018  
2.935  
2.749  
2.728  
2.616  
2.604  
2.594  
2.577  
2.077  
2.071  
2.066  
2.061  
2.055

0.007  
-0.001



Current Data Parameters  
NAME ZHM-BEN  
EXPNO 10  
PROCNO 1

F2 - Acquisition Parameters  
Date\_ 20120315  
Time\_ 11.21  
INSTRUM spect  
PROBHD 5 mm PABBO BB-  
PULPROG zg30  
TD 65536  
SOLVENT Acetone  
NS 16  
DS 2  
SWH 8223.685 Hz  
FIDRES 0.125483 Hz  
AQ 3.9846387 sec  
RG 203  
DW 60.800 usec  
DE 6.50 usec  
TE 298.0 K  
D1 1.00000000 sec

==== CHANNEL f1 =====  
NUC1 1H  
P1 14.50 usec  
PLW1 12.85299969 W  
SFO1 400.1324710 MHz

F2 - Processing parameters  
SI 65536  
SF 400.1300000 MHz  
WDW EM  
SSB 0  
LB 0.30 Hz  
GB 0  
PC 1.00

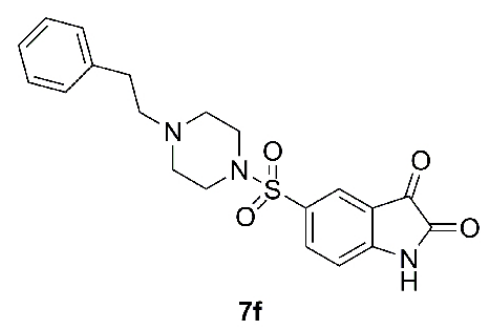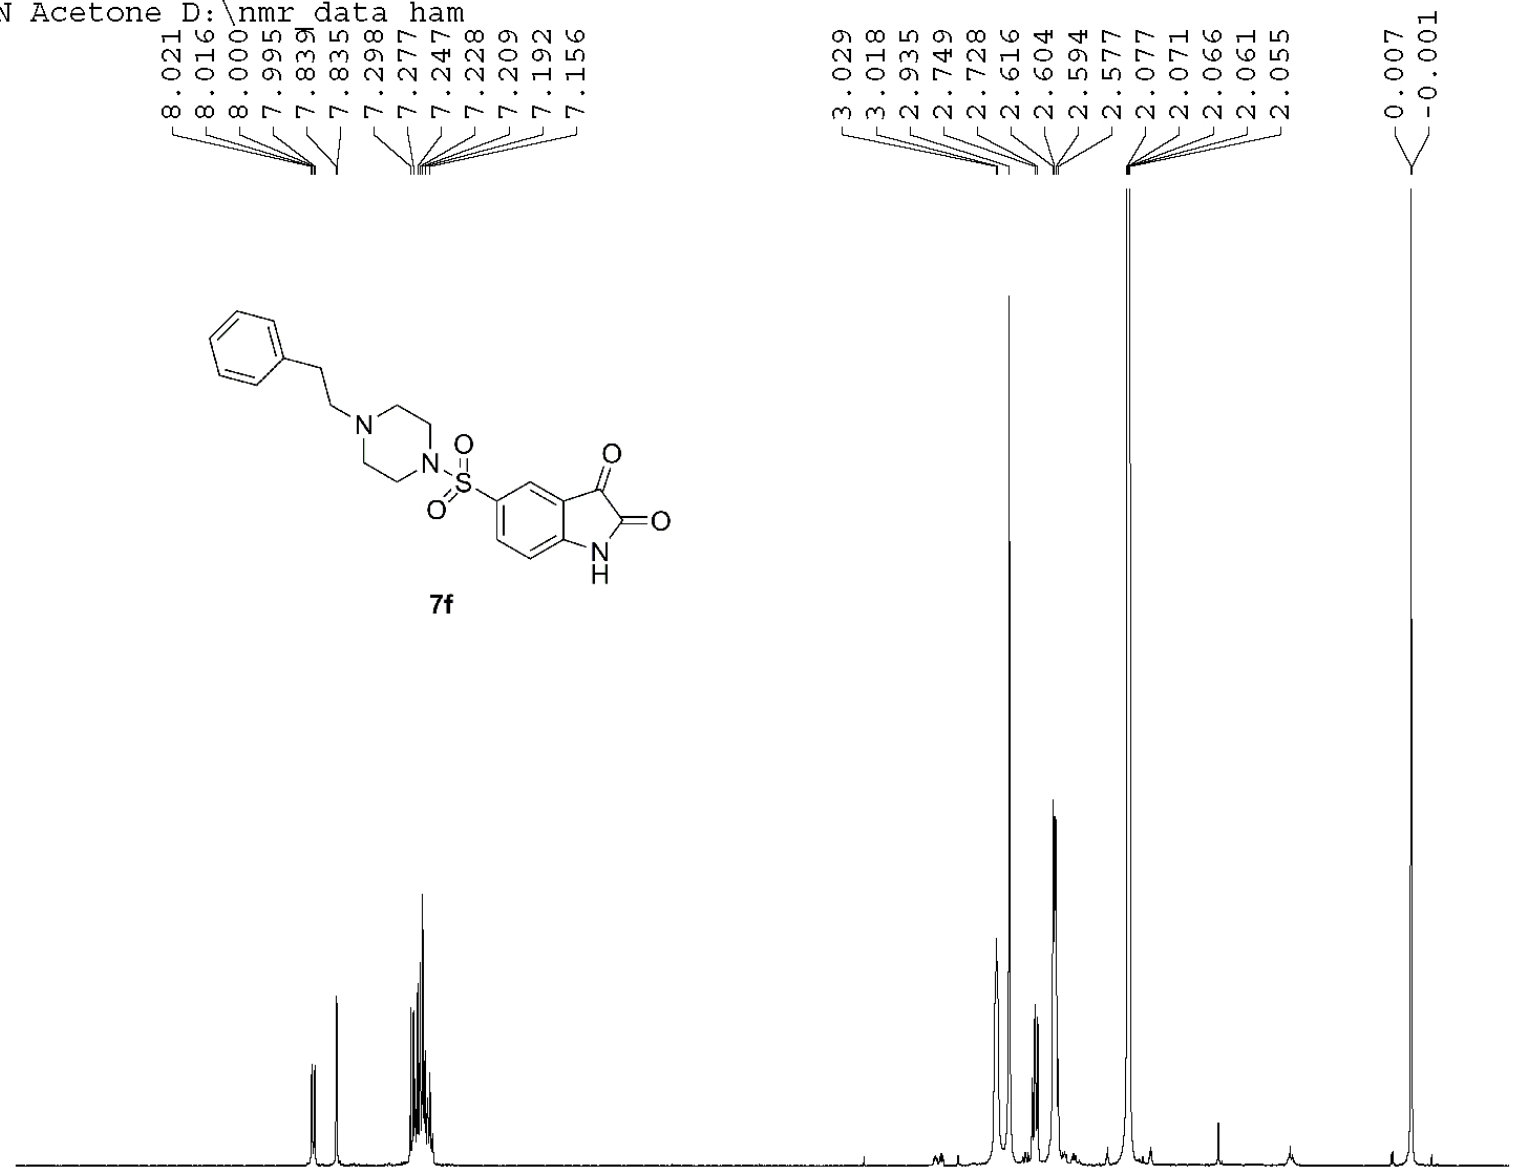

10 9 8 7 6 5 4 3 2 1 0 ppm

1.00  
0.93  
6.23

3.90  
2.11  
6.20

S20120417-009

20120417

PROTON DMSO-d<sub>6</sub>: \nmr\_data ham

— 11.47  
7.923  
7.918  
7.902  
7.897  
7.818  
7.699  
7.695  
7.119  
7.098  
6.985  
6.977  
6.610  
6.605  
6.601  
6.597  
3.750  
3.320  
2.992  
2.980  
2.968  
2.508  
2.504  
2.500  
— 1.239  
— 0.003

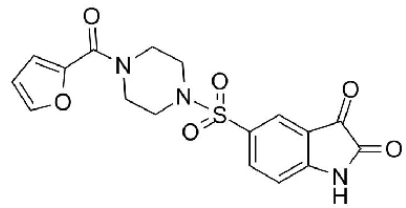

**7g**

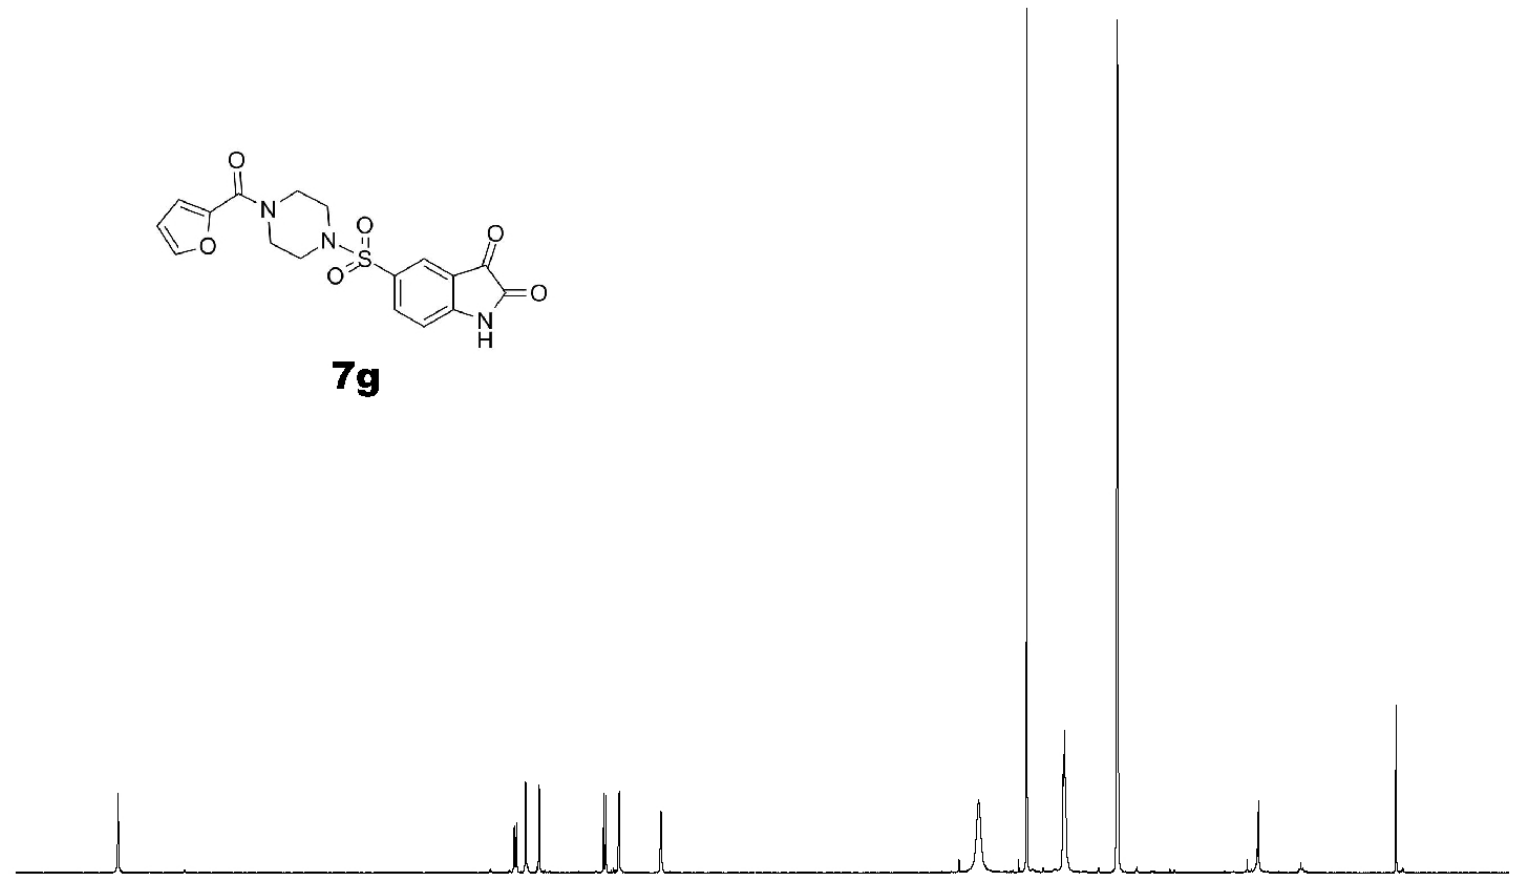

Current Data Parameters  
NAME ZHM-FUNAN  
EXPNO 10  
PROCNO 1

F2 - Acquisition Parameters  
Date\_ 20120417  
Time 10.51  
INSTRUM spect  
PROBHD 5 mm PABBO BB-  
PULPROG zg30  
TD 65536  
SOLVENT DMSO  
NS 16  
DS 2  
SWH 8223.685 Hz  
FIDRES 0.125483 Hz  
AQ 3.9846387 sec  
RG 203  
DW 60.800 usec  
DE 6.50 usec  
TE 298.0 K  
D1 1.00000000 sec

==== CHANNEL f1 =====  
NUC1 1H  
P1 14.50 usec  
PLW1 12.85299969 W  
SFO1 400.1324710 MHz

F2 - Processing parameters  
SI 65536  
SF 400.1300000 MHz  
WDW EM  
SSB 0  
LB 0.30 Hz  
GB 0  
PC 1.00

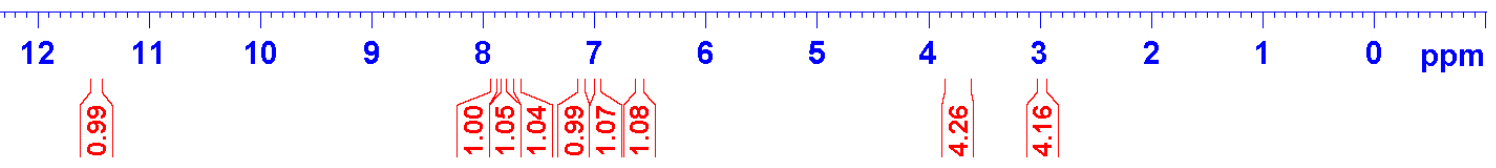

S20121228-041

20121228

PROTON DMSO D:\nmr data ham

11.458  
8.079  
8.076  
8.067  
8.064  
7.939  
7.935  
7.919  
7.914  
7.709  
7.705  
7.533  
7.529  
7.515  
7.511  
7.494  
7.489  
7.114  
7.093  
6.819  
6.797  
6.652  
6.639  
6.634  
6.622  
3.616  
3.605  
3.593  
3.329  
2.991  
2.980  
2.968  
2.509  
2.505  
2.501

0.001

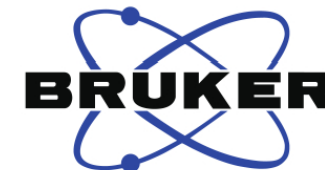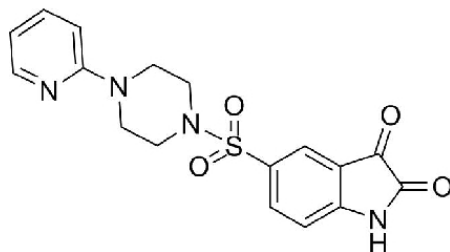

7h

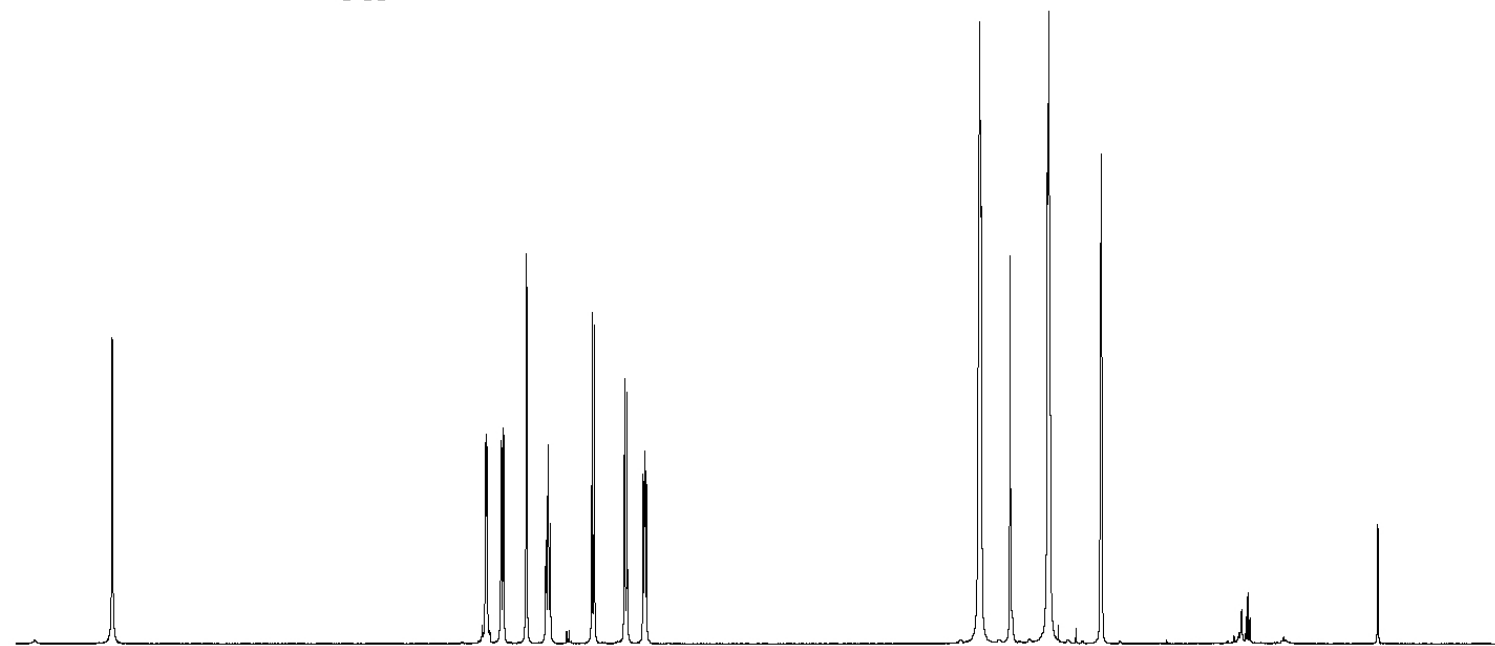

Current Data Parameters  
NAME ZHM-2Bi  
EXPNO 10  
PROCNO 1

F2 - Acquisition Parameters  
Date\_ 20121228  
Time 17.13  
INSTRUM spect  
PROBHD 5 mm PABBO BB-  
PULPROG zg30  
TD 65536  
SOLVENT DMSO  
NS 16  
DS 2  
SWH 8223.685 Hz  
FIDRES 0.125483 Hz  
AQ 3.9846387 sec  
RG 203  
DW 60.800 usec  
DE 6.50 usec  
TE 298.0 K  
D1 1.00000000 sec

==== CHANNEL f1 =====  
NUC1 1H  
P1 14.50 usec  
PLW1 12.85299969 W  
SFO1 400.1324710 MHz

F2 - Processing parameters  
SI 65536  
SF 400.1300000 MHz  
WDW EM  
SSB 0  
LB 0.30 Hz  
GB 0  
PC 1.00

12 11 10 9 8 7 6 5 4 3 2 1 0 ppm

0.83

1.00  
0.95  
0.93  
0.99  
0.93  
0.99  
0.99

3.91

3.84



S20120327-020

20120327

PROTON DMSO  $\delta$  \nmr\_data ham

— 11.464

7.920  
7.916  
7.899  
7.895  
7.678  
7.675  
7.118  
7.098

4.041  
4.023  
3.322  
2.905  
2.892  
2.878  
2.508  
2.504  
2.500

1.550  
1.537  
1.373  
1.361

— 0.003



Current Data Parameters  
NAME ZHM-PAIDING1  
EXPNO 10  
PROCNO 1

F2 - Acquisition Parameters  
Date\_ 20120327  
Time 12.40  
INSTRUM spect  
PROBHD 5 mm PABBO BB-  
PULPROG zg30  
TD 65536  
SOLVENT DMSO  
NS 16  
DS 2  
SWH 8223.685 Hz  
FIDRES 0.125483 Hz  
AQ 3.9846387 sec  
RG 203  
DW 60.800 usec  
DE 6.50 usec  
TE 298.0 K  
D1 1.00000000 sec

==== CHANNEL f1 =====  
NUC1 1H  
P1 14.50 usec  
PLW1 12.85299969 W  
SFO1 400.1324710 MHz

F2 - Processing parameters  
SI 65536  
SF 400.1300000 MHz  
WDW EM  
SSB 0  
LB 0.30 Hz  
GB 0  
PC 1.00

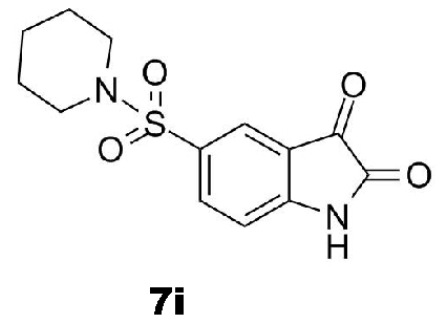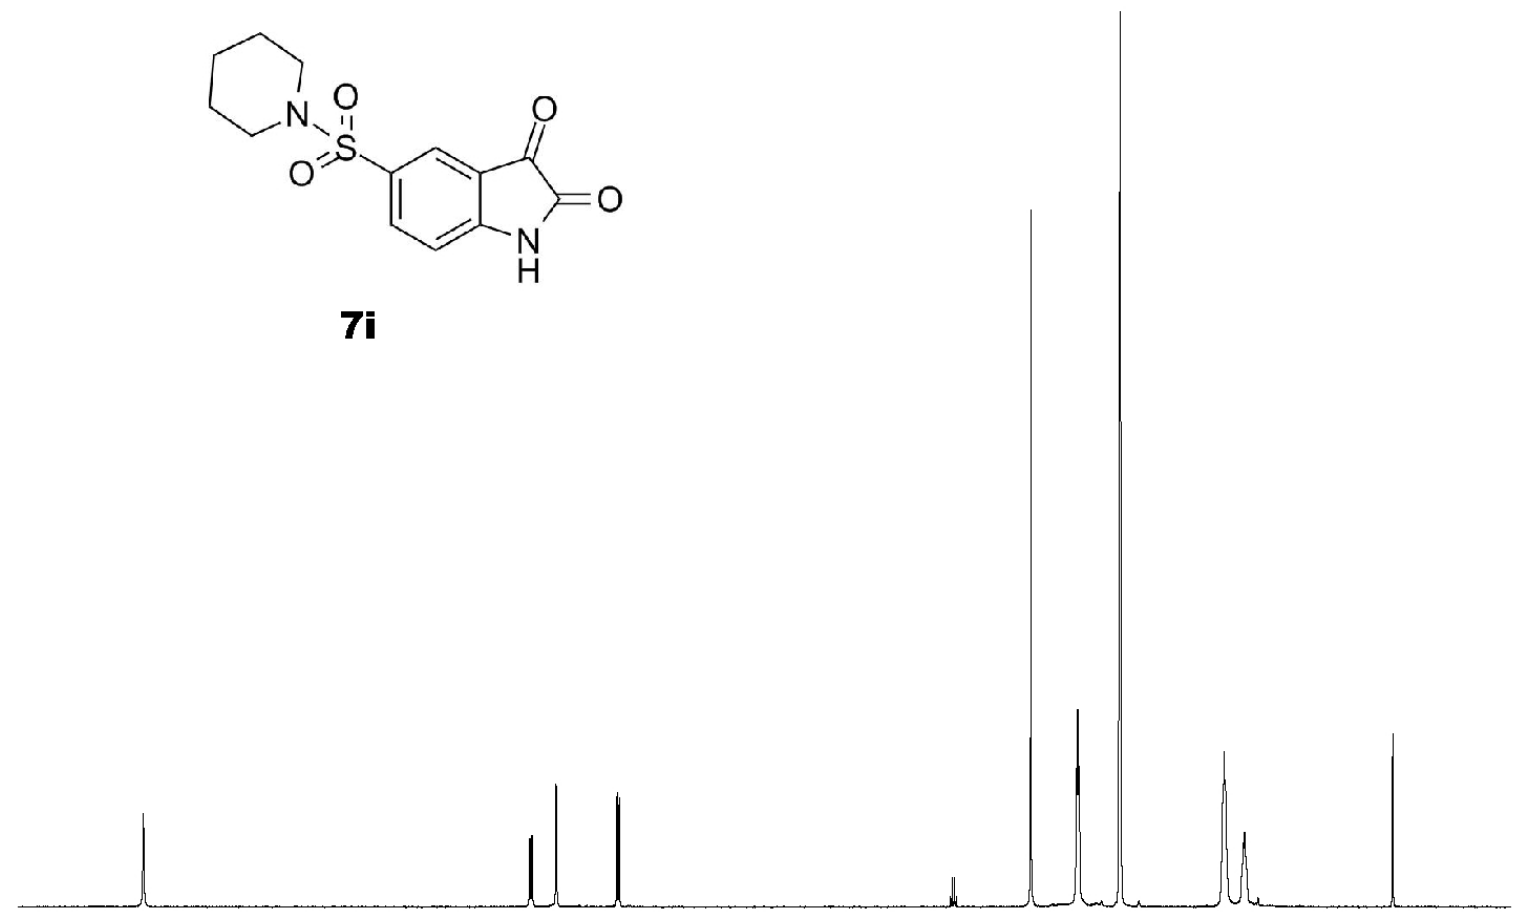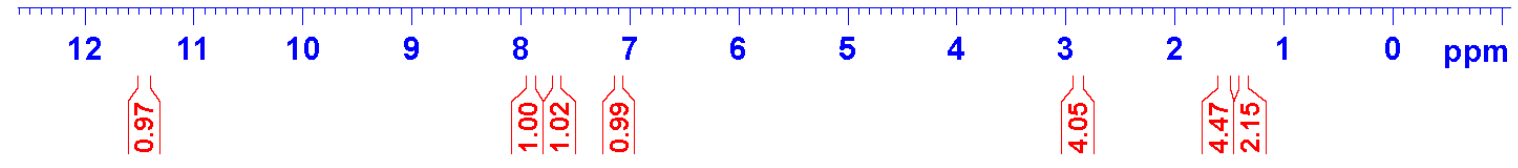

S20120331-017

20120330

PROTON DMSO D:\nmr\_data ham

— 11.491

7.924  
7.920  
7.904  
7.899  
7.693  
7.140  
7.120

3.647  
3.636  
3.624  
3.325  
2.891  
2.880  
2.869  
2.504

— 0.002



Current Data Parameters  
NAME ZHM-MA2  
EXPNO 10  
PROCNO 1

F2 - Acquisition Parameters  
Date\_ 20120331  
Time 10.49  
INSTRUM spect  
PROBHD 5 mm PABBO BB-  
PULPROG zg30  
TD 65536  
SOLVENT DMSO  
NS 16  
DS 2  
SWH 8223.685 Hz  
FIDRES 0.125483 Hz  
AQ 3.9846387 sec  
RG 203  
DW 60.800 usec  
DE 6.50 usec  
TE 298.0 K  
D1 1.00000000 sec

==== CHANNEL f1 =====  
NUC1 1H  
P1 14.50 usec  
PLW1 12.85299969 W  
SFO1 400.1324710 MHz

F2 - Processing parameters  
SI 65536  
SF 400.1300000 MHz  
WDW EM  
SSB 0  
LB 0.30 Hz  
GB 0  
PC 1.00

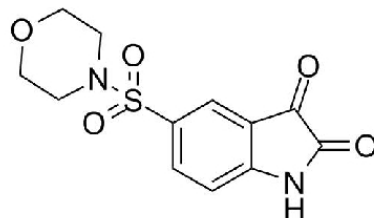

7j

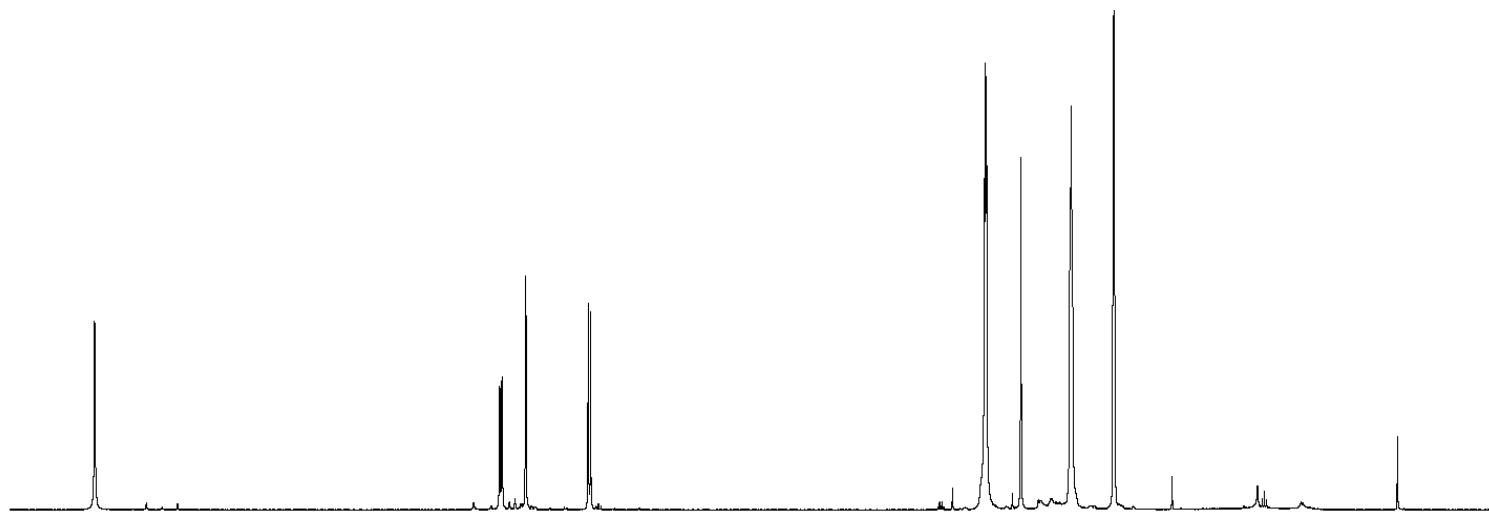

12 11 10 9 8 7 6 5 4 3 2 1 0 ppm

0.97

1.00

1.02

0.98

4.79

4.17

S20120319-016

20120319

PROTON DMSO D:\nmr\_data ham

— 11.456

7.920  
7.915  
7.899  
7.894  
7.678  
7.674  
7.116  
7.095

3.608  
3.579  
3.320  
2.508  
2.504  
2.500  
2.249  
2.224  
2.219  
2.194  
1.671  
1.644  
1.302  
1.296  
1.286  
1.156  
1.147  
1.125  
1.116

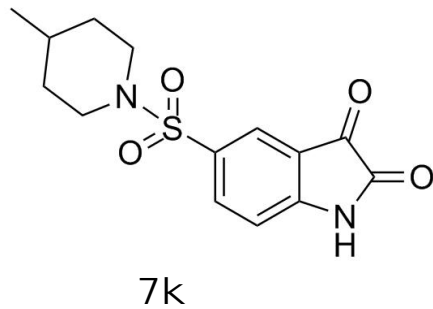

Current Data Parameters  
NAME ZHM-4JIAPAI  
EXPNO 10  
PROCNO 1

F2 - Acquisition Parameters  
Date\_ 20120319  
Time 11.20  
INSTRUM spect  
PROBHD 5 mm PABBO BB-  
PULPROG zg30  
TD 65536  
SOLVENT DMSO  
NS 16  
DS 2  
SWH 8223.685 Hz  
FIDRES 0.125483 Hz  
AQ 3.9846387 sec  
RG 203  
DW 60.800 usec  
DE 6.50 usec  
TE 298.0 K  
D1 1.00000000 sec

==== CHANNEL f1 =====  
NUC1 1H  
P1 14.50 usec  
PLW1 12.85299969 W  
SFO1 400.1324710 MHz

F2 - Processing parameters  
SI 65536  
SF 400.1300000 MHz  
WDW EM  
SSB 0  
LB 0.30 Hz  
GB 0  
PC 1.00

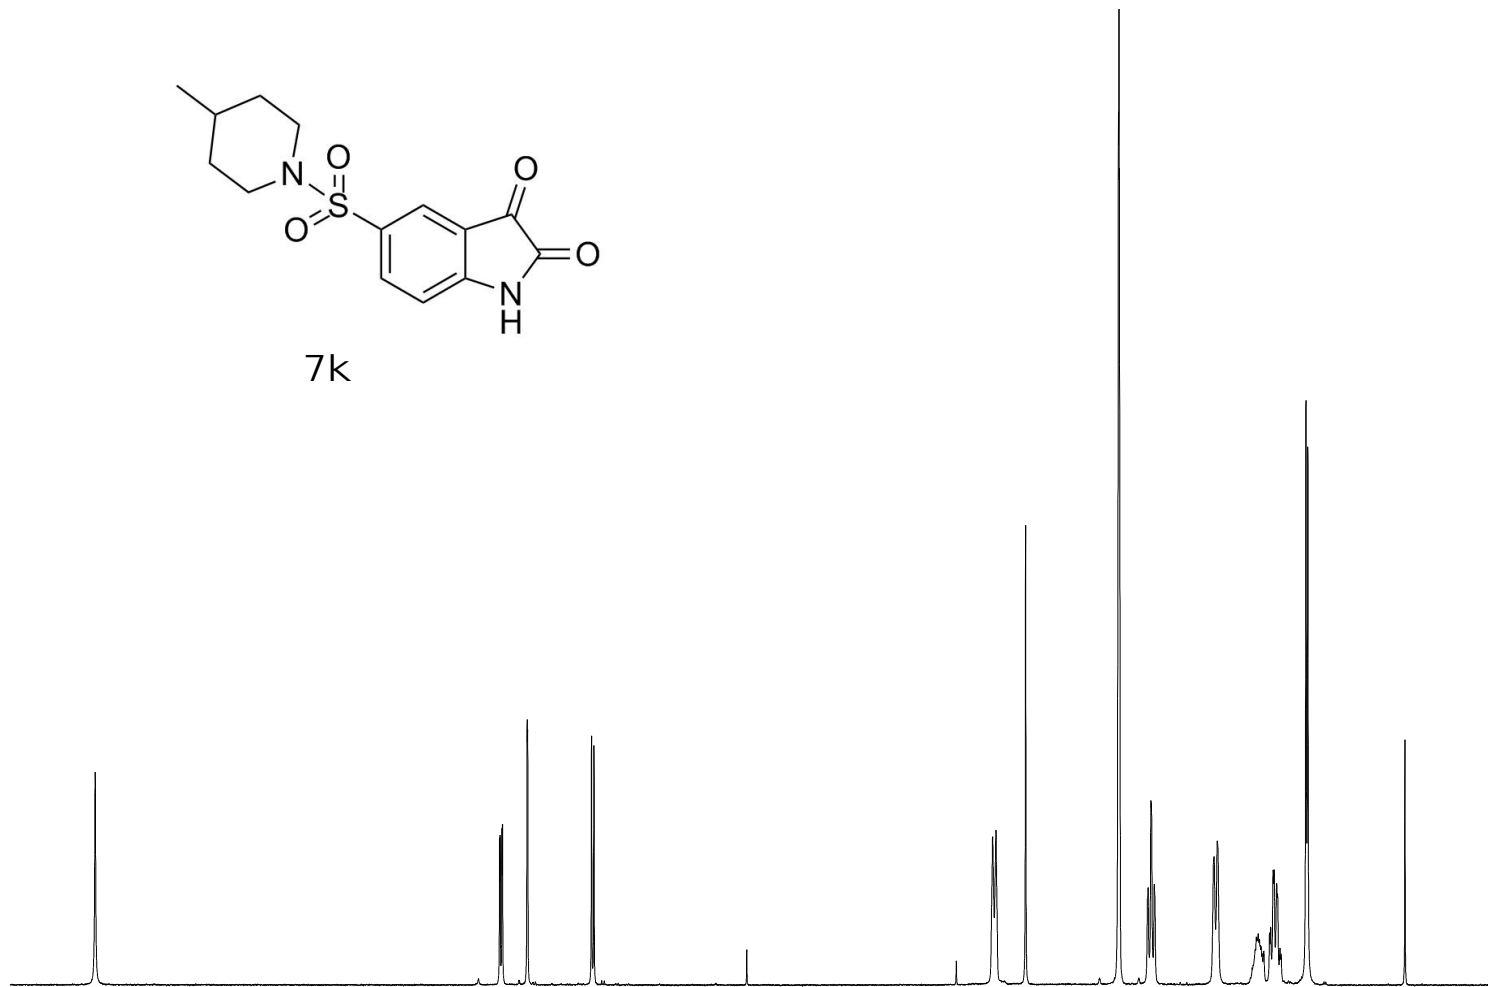

12 11 10 9 8 7 6 5 4 3 2 1 0 ppm

0.97

1.00  
0.98

0.99

2.05

2.03

2.12

1.29

2.14

3.20

S20120323-005

20120323

PROTON DMSO  $d_6$  \nmr\_data ham

11.408  
7.991  
7.986  
7.970  
7.966  
7.739  
7.736  
7.080  
7.059

4.107  
4.098  
3.603  
3.577  
3.325  
2.996  
2.970  
2.964  
2.937  
2.504  
1.556  
1.527  
1.506  
1.496  
1.476  
1.449  
1.437  
1.425  
1.223  
1.042  
1.025  
0.003

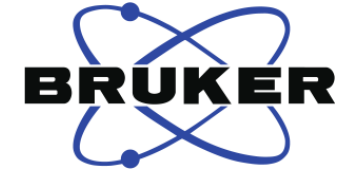

Current Data Parameters  
NAME ZHM-2JIAPAI  
EXPNO 10  
PROCNO 1

F2 - Acquisition Parameters  
Date\_ 20120323  
Time 11.51  
INSTRUM spect  
PROBHD 5 mm PABBO BB-  
PULPROG zg30  
TD 65536  
SOLVENT DMSO  
NS 16  
DS 2  
SWH 8223.685 Hz  
FIDRES 0.125483 Hz  
AQ 3.9846387 sec  
RG 203  
DW 60.800 usec  
DE 6.50 usec  
TE 298.0 K  
D1 1.00000000 sec

==== CHANNEL f1 =====  
NUC1 1H  
P1 14.50 usec  
PLW1 12.85299969 W  
SFO1 400.1324710 MHz

F2 - Processing parameters  
SI 65536  
SF 400.1300000 MHz  
WDW EM  
SSB 0  
LB 0.30 Hz  
GB 0  
PC 1.00

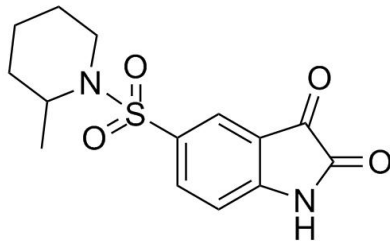

71

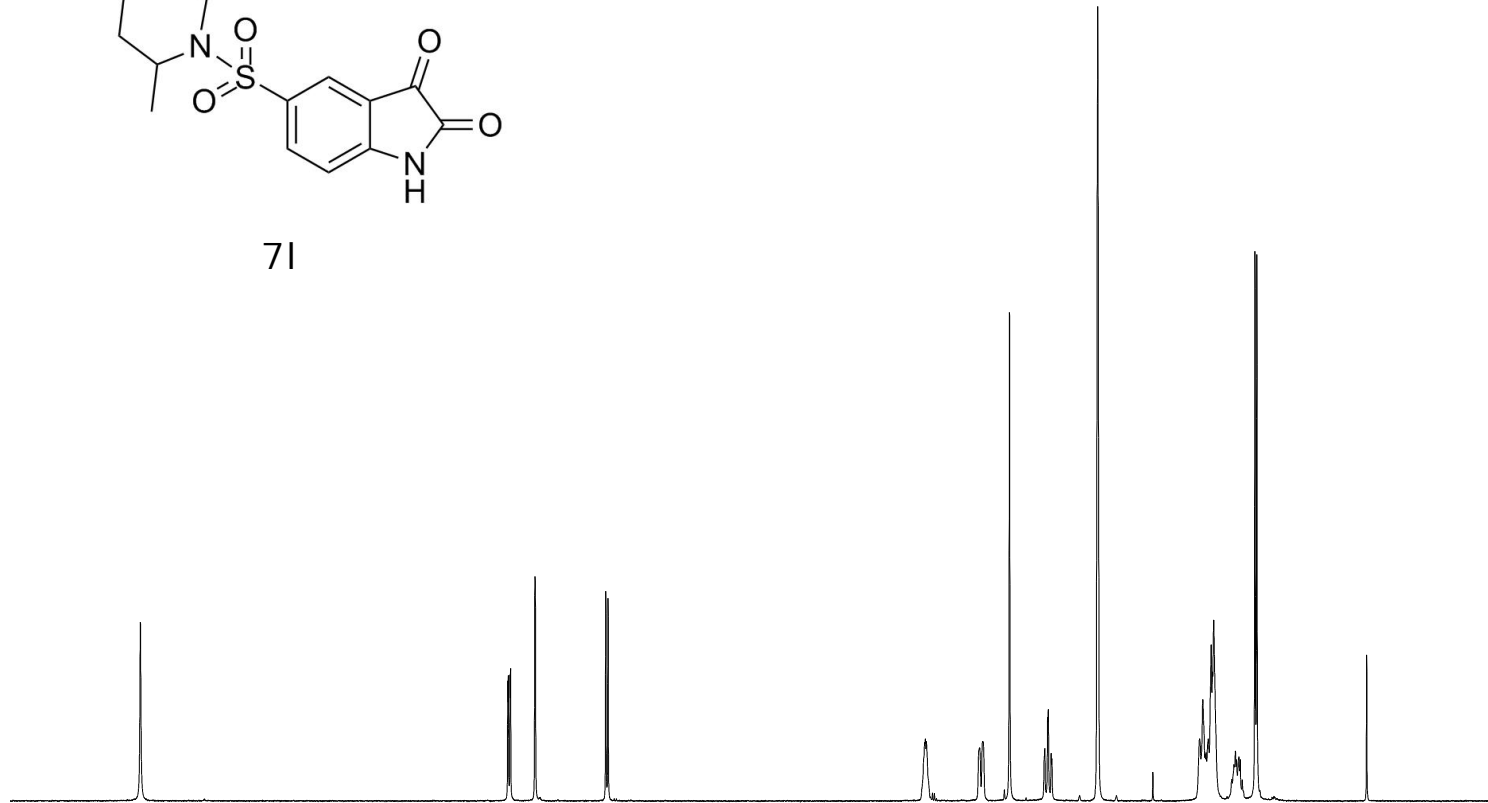

1.03

1.03  
1.00

1.03

1.07

1.06

1.11

5.47

1.31

3.10

S20120828-056

20120828

PROTON CDCl3 D:\nmr data ham

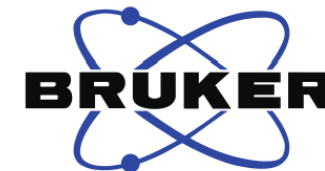

Current Data Parameters  
NAME ZHM-3.5-ERJIA  
EXPNO 10  
PROCNO 1

F2 - Acquisition Parameters  
Date\_ 20120829  
Time\_ 6.35  
INSTRUM spect  
PROBHD 5 mm PABBO BB-  
PULPROG zg30  
TD 65536  
SOLVENT CDCl3  
NS 16  
DS 2  
SWH 8223.685 Hz  
FIDRES 0.125483 Hz  
AQ 3.9846387 sec  
RG 203  
DW 60.800 usec  
DE 6.50 usec  
TE 298.0 K  
D1 1.00000000 sec

==== CHANNEL f1 =====  
NUC1 1H  
P1 14.50 usec  
PLW1 12.85299969 W  
SFO1 400.1324710 MHz

F2 - Processing parameters  
SI 65536  
SF 400.1300000 MHz  
WDW EM  
SSB 0  
LB 0.30 Hz  
GB 0  
PC 1.00

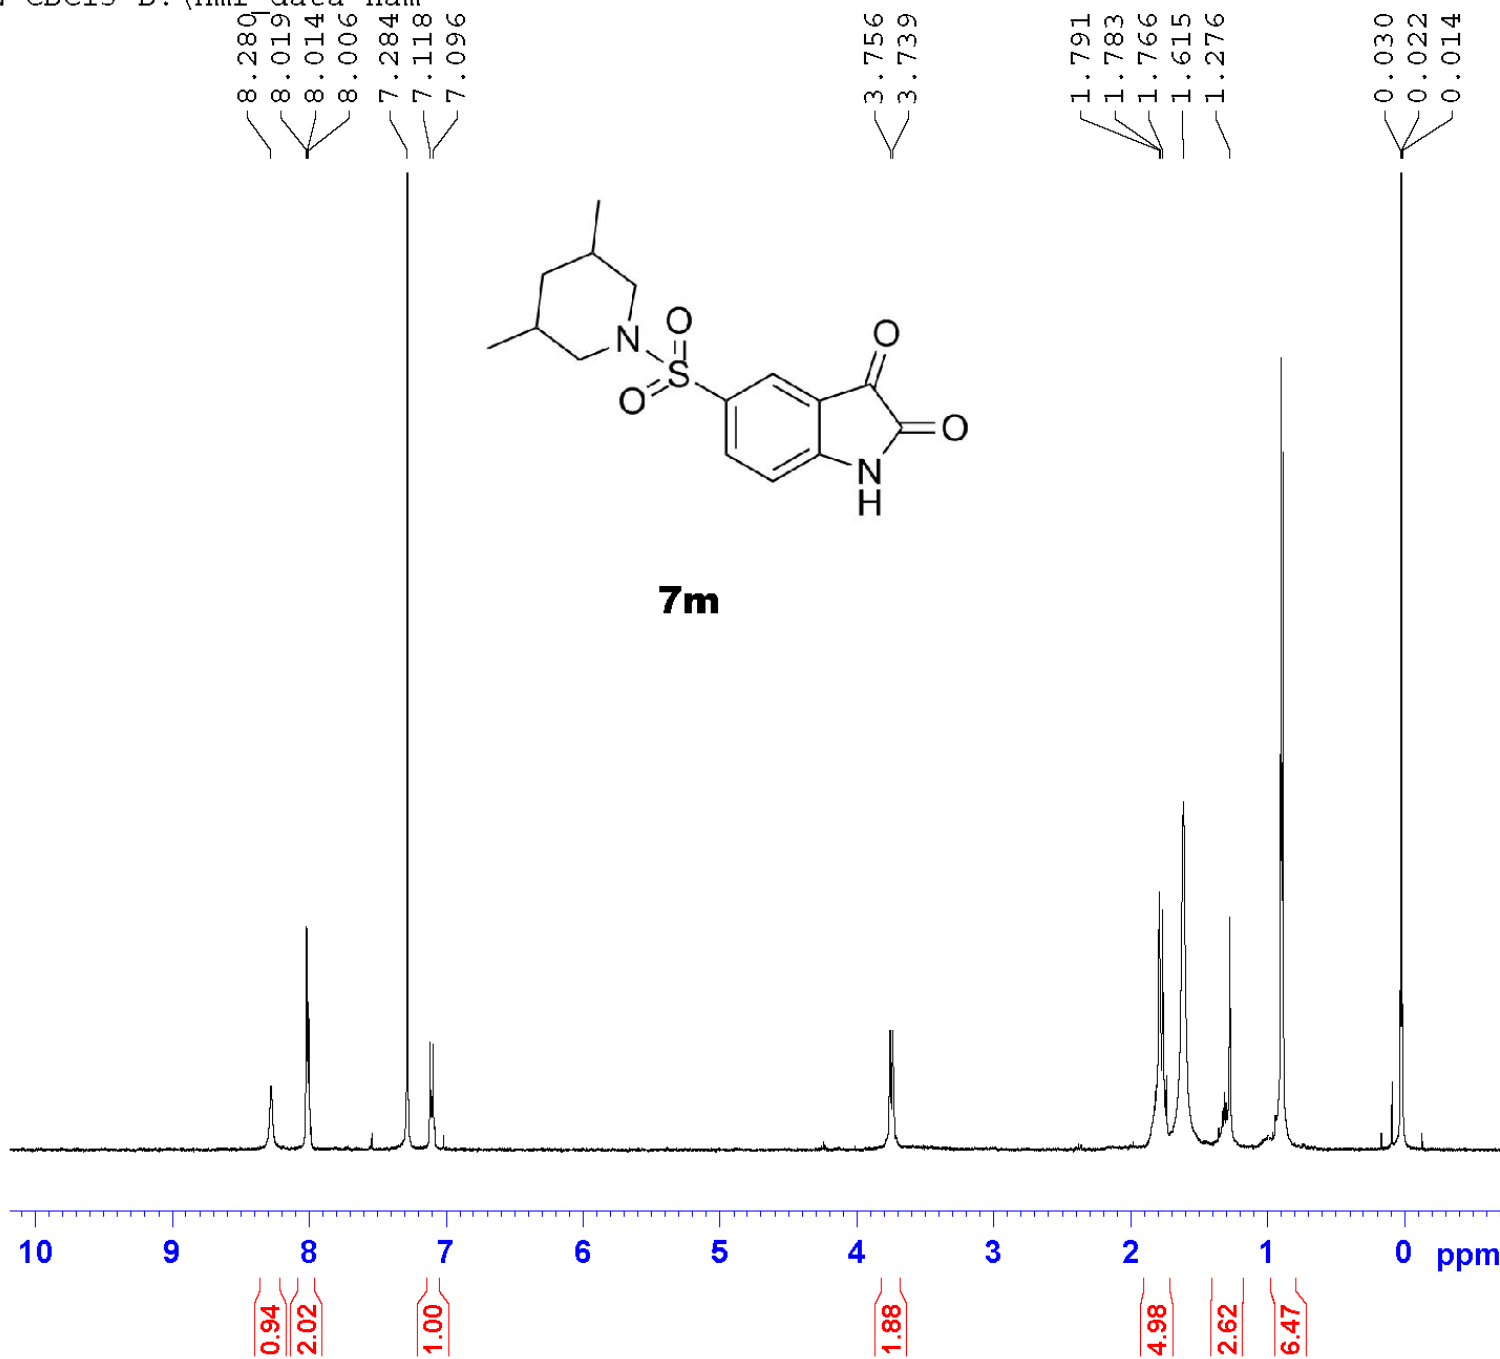

S20120612-039

20120612

PROTON CDCl3 D:\nmr data ham

8.042  
8.038  
8.021  
8.017  
7.980  
7.976  
7.283  
7.069  
7.048

3.343  
3.088  
2.530  
2.518  
2.507  
2.303  
1.274  
0.019

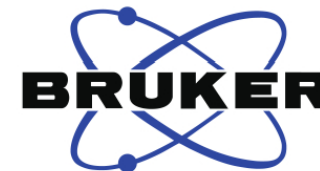

Current Data Parameters  
NAME ZHM-NJIAPAIJIA  
EXPNO 10  
PROCNO 1

F2 - Acquisition Parameters  
Date\_ 20120612  
Time 14.27  
INSTRUM spect  
PROBHD 5 mm PABBO BB-  
PULPROG zg30  
TD 65536  
SOLVENT CDCl3  
NS 16  
DS 2  
SWH 8223.685 Hz  
FIDRES 0.125483 Hz  
AQ 3.9846387 sec  
RG 203  
DW 60.800 usec  
DE 6.50 usec  
TE 298.1 K  
D1 1.00000000 sec

==== CHANNEL f1 =====  
NUC1 1H  
P1 14.50 usec  
PLW1 12.85299969 W  
SFO1 400.1324710 MHz

F2 - Processing parameters  
SI 65536  
SF 400.1300000 MHz  
WDW EM  
SSB 0  
LB 0.30 Hz  
GB 0  
PC 1.00

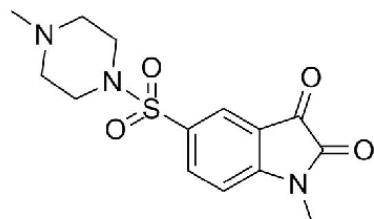

8a1

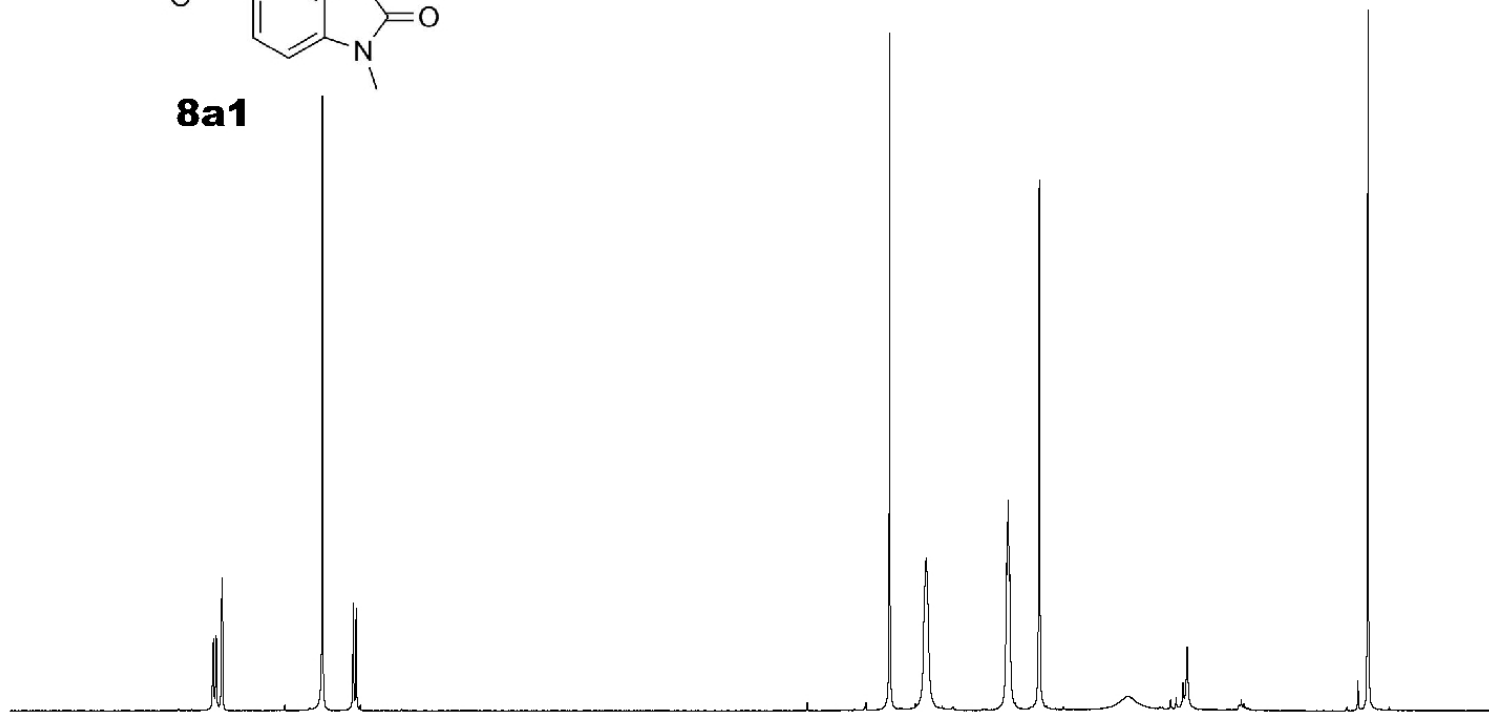

9 8 7 6 5 4 3 2 1 0 ppm

1.03  
0.94

1.00

3.08  
4.04

4.15  
3.18

S20120612-038

20120612

PROTON CDCl3 D:\nmr data ham



Current Data Parameters  
NAME ZHM-NJIABIAN  
EXPNO 10  
PROCNO 1

F2 - Acquisition Parameters  
Date\_ 20120612  
Time\_ 14.22  
INSTRUM spect  
PROBHD 5 mm PABBO BB-  
PULPROG zg30  
TD 65536  
SOLVENT CDCl3  
NS 16  
DS 2  
SWH 8223.685 Hz  
FIDRES 0.125483 Hz  
AQ 3.9846387 sec  
RG 203  
DW 60.800 usec  
DE 6.50 usec  
TE 298.5 K  
D1 1.00000000 sec

==== CHANNEL f1 =====  
NUC1 1H  
P1 14.50 usec  
PLW1 12.85299969 W  
SFO1 400.1324710 MHz

F2 - Processing parameters  
SI 65536  
SF 400.1300000 MHz  
WDW EM  
SSB 0  
LB 0.30 Hz  
GB 0  
PC 1.00

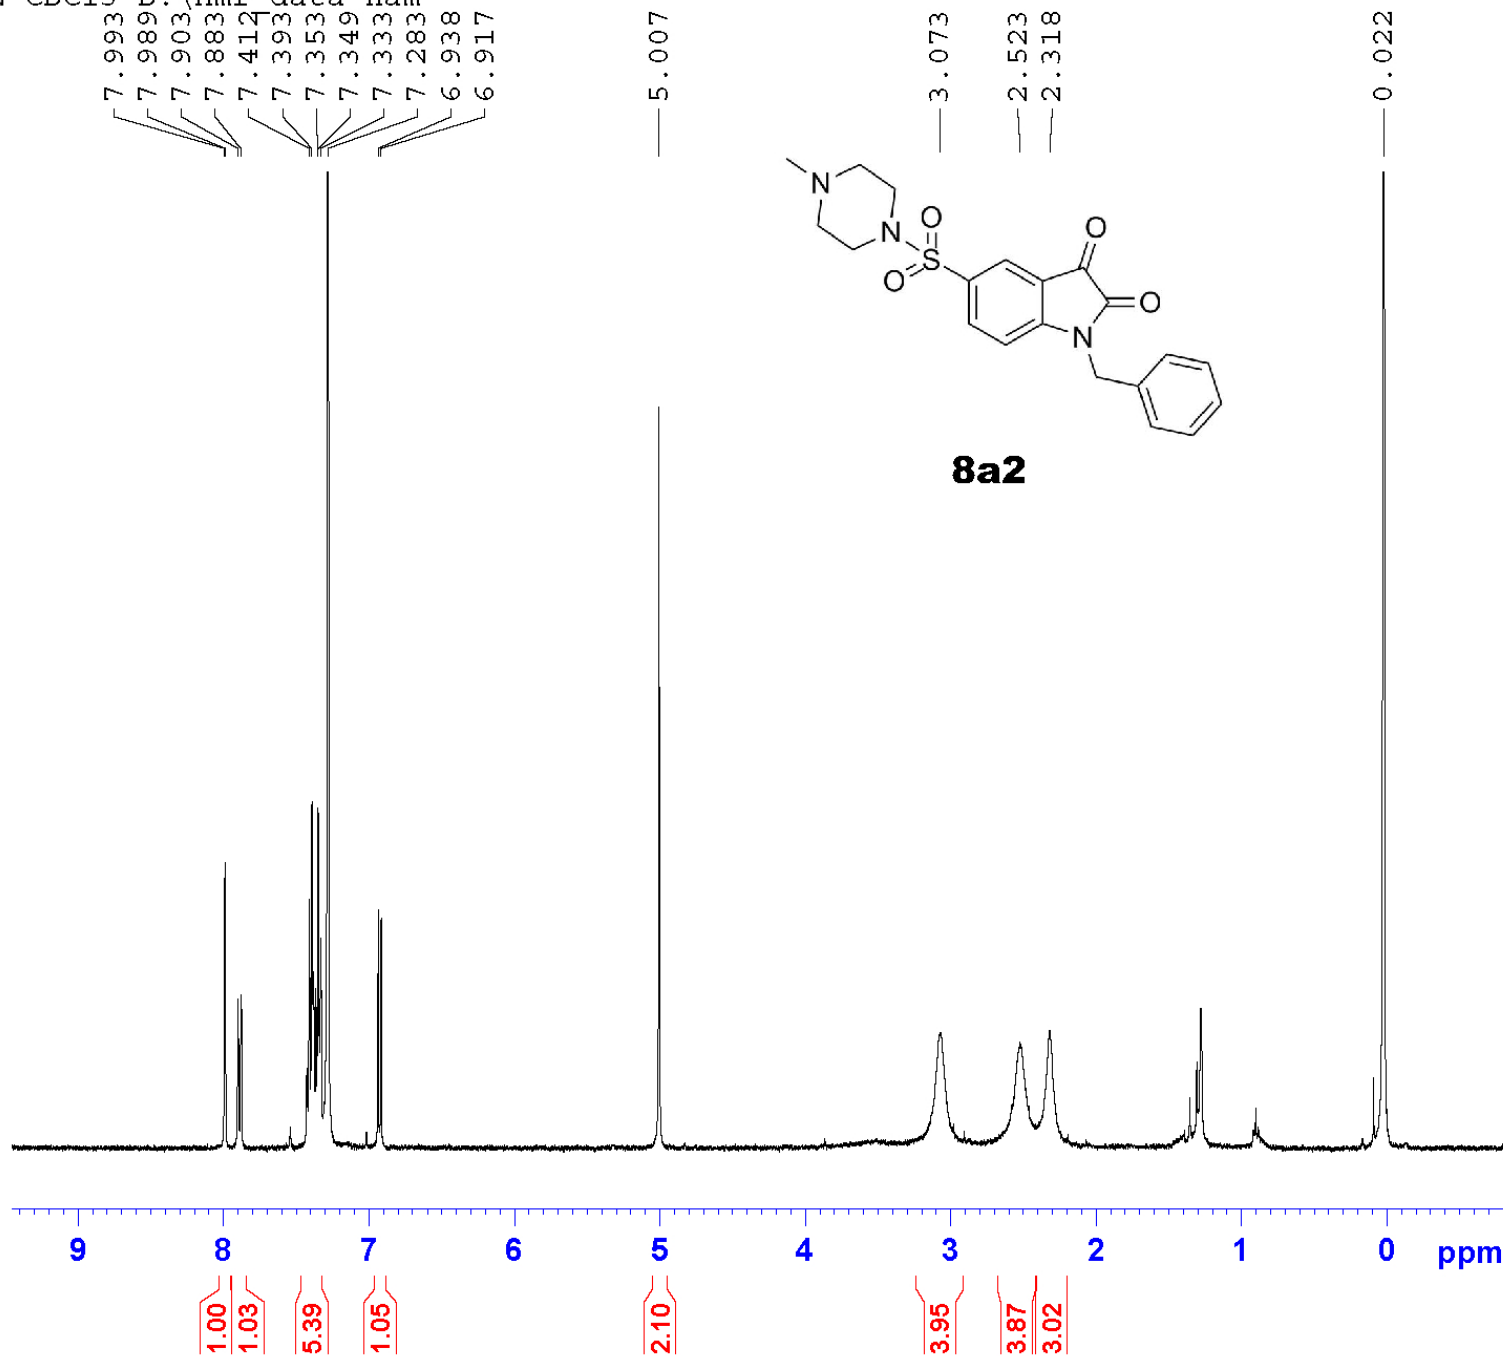

S20120612-036

20120612

PROTON CDC13 D:\nmr data ham

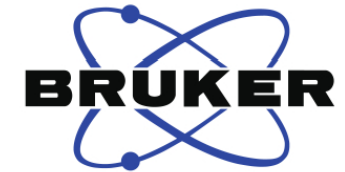

Current Data Parameters  
NAME ZHM-NJIANAI  
EXPNO 10  
PROCNO 1

F2 - Acquisition Parameters  
Date\_ 20120612  
Time 14.12  
INSTRUM spect  
PROBHD 5 mm PABBO BB-  
PULPROG zg30  
TD 65536  
SOLVENT CDCl3  
NS 16  
DS 2  
SWH 8223.685 Hz  
FIDRES 0.125483 Hz  
AQ 3.9846387 sec  
RG 203  
DW 60.800 usec  
DE 6.50 usec  
TE 298.4 K  
D1 1.00000000 sec

==== CHANNEL f1 =====  
NUC1 1H  
P1 14.50 usec  
PLW1 12.85299969 W  
SFO1 400.1324710 MHz

F2 - Processing parameters  
SI 65536  
SF 400.1300000 MHz  
WDW EM  
SSB 0  
LB 0.30 Hz  
GB 0  
PC 1.00

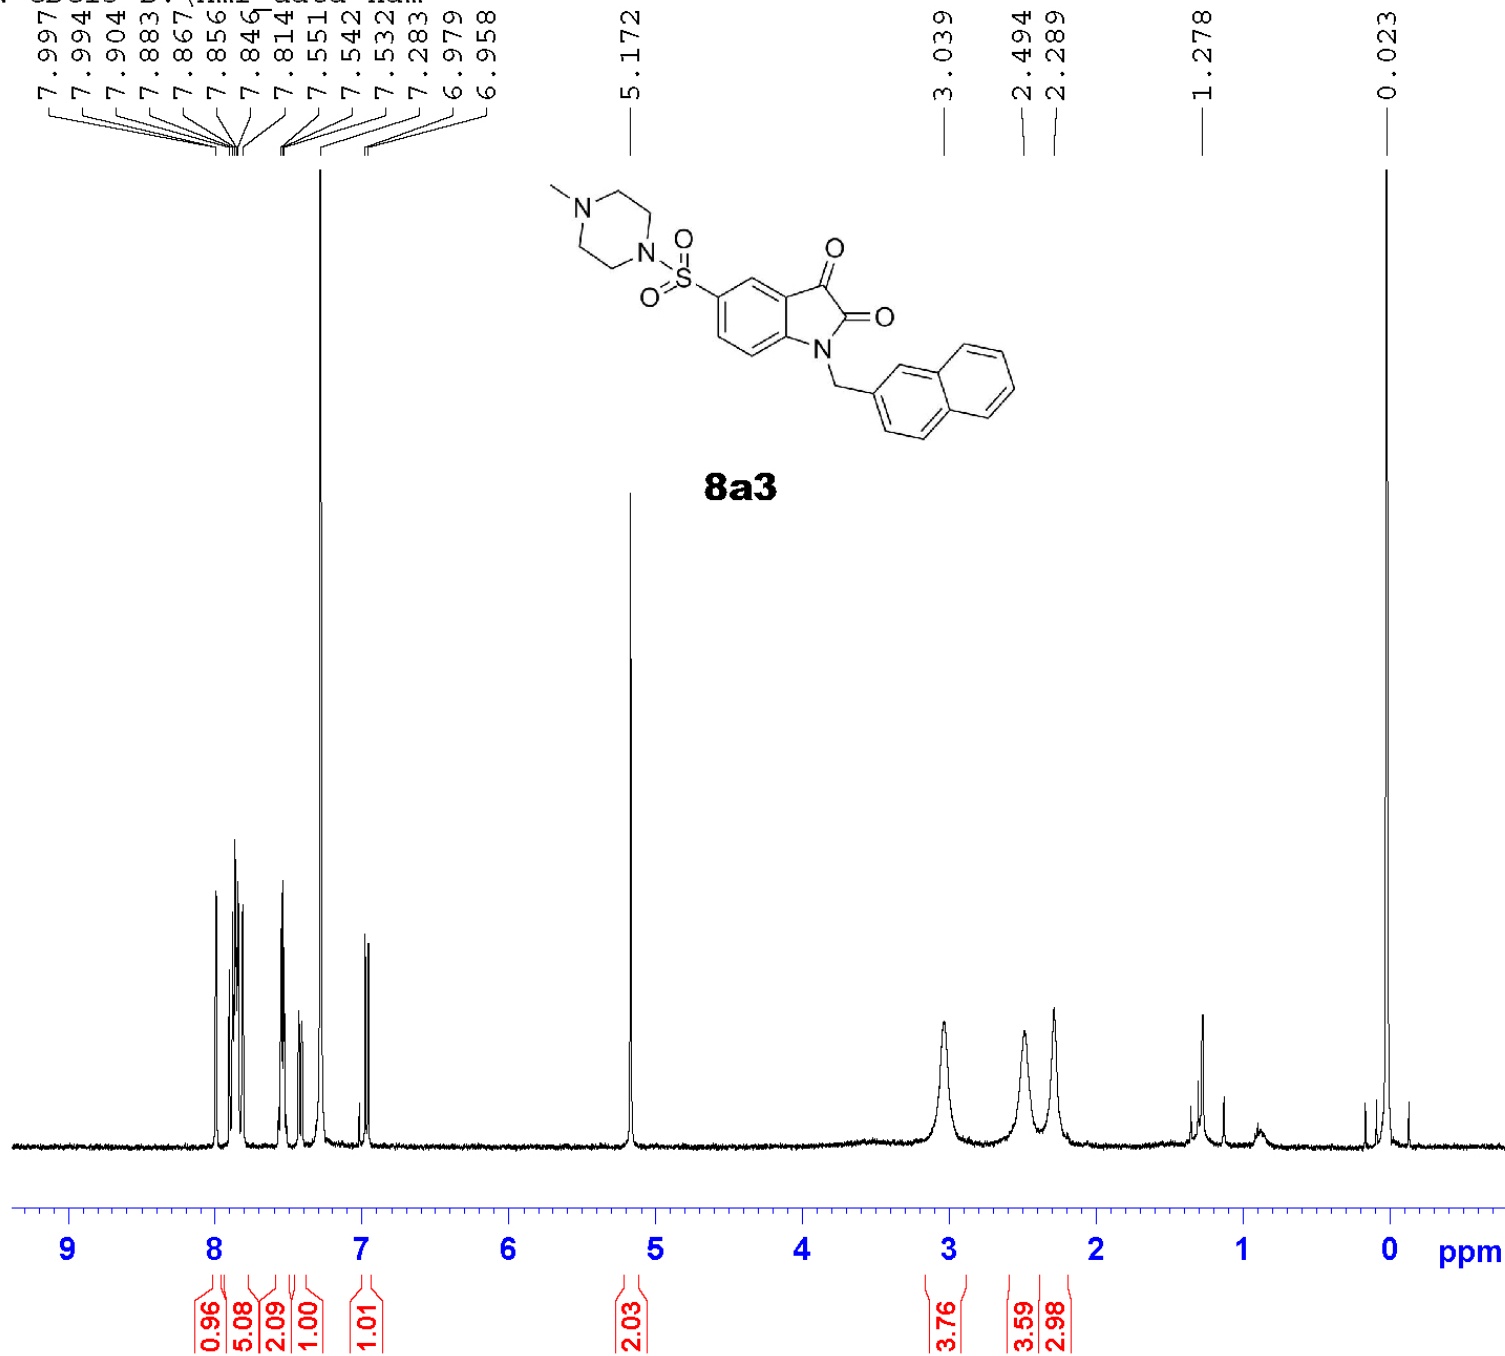



S20130415-023

20130415

PROTON DMSO D:\nmr data ham

7.949  
7.787  
7.474  
7.456  
7.373  
7.355  
7.336  
7.309  
7.291  
7.211  
7.190  
7.056  
7.034  
7.012  
6.934  
6.922  
6.911  
6.900  
4.969

3.322  
3.299  
3.141  
3.129  
3.030  
3.019  
2.503

— 0.002

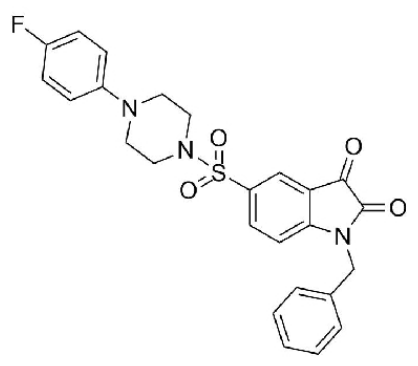

**8b2**

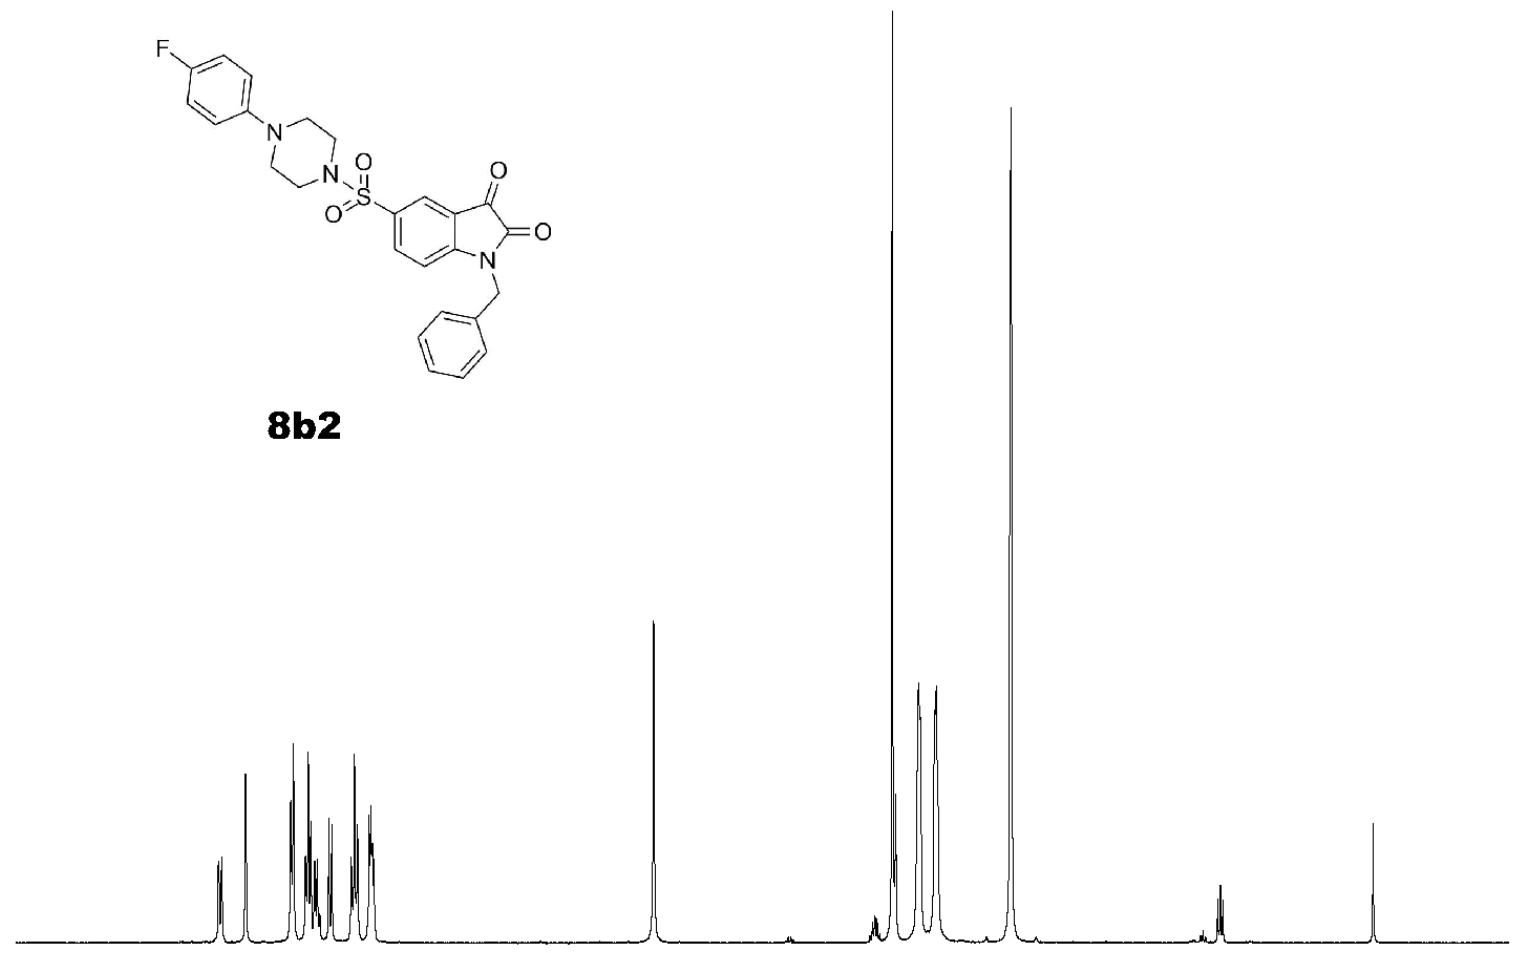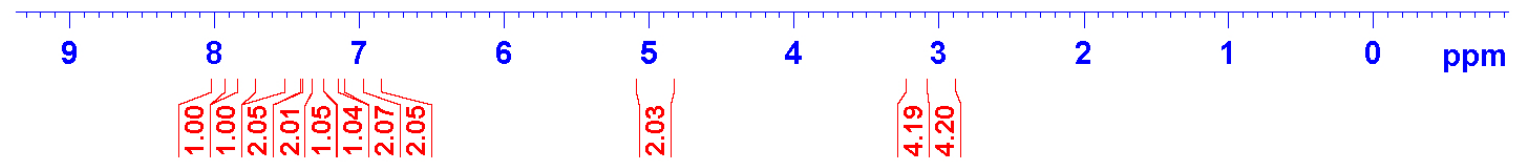

Current Data Parameters  
NAME ZHM-4FBian  
EXPNO 10  
PROCNO 1

F2 - Acquisition Parameters  
Date\_ 20130416  
Time 2.19  
INSTRUM spect  
PROBHD 5 mm PABBO BB-  
PULPROG zg30  
TD 65536  
SOLVENT DMSO  
NS 16  
DS 2  
SWH 8223.685 Hz  
FIDRES 0.125483 Hz  
AQ 3.9846387 sec  
RG 203  
DW 60.800 usec  
DE 6.50 usec  
TE 298.0 K  
D1 1.00000000 sec

==== CHANNEL f1 =====  
NUC1 1H  
P1 14.50 usec  
PLW1 12.85299969 W  
SFO1 400.1324710 MHz

F2 - Processing parameters  
SI 65536  
SF 400.1300000 MHz  
WDW EM  
SSB 0  
LB 0.30 Hz  
GB 0  
PC 1.00

S20120910-127

20120910

PROTON CDCl3 D:\nmr data ham

8.036  
7.904  
7.883  
7.854  
7.831  
7.552  
7.543  
7.533  
7.450  
7.429  
7.284  
7.021  
7.001  
6.985

5.177

3.219  
3.200

1.279

0.093  
0.024

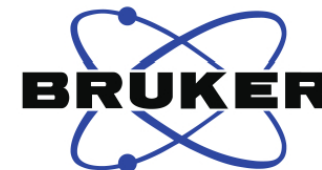

Current Data Parameters  
NAME ZHM-4FBENNAI  
EXPNO 10  
PROCNO 1

F2 - Acquisition Parameters  
Date\_ 20120910  
Time 14.12  
INSTRUM spect  
PROBHD 5 mm PABBO BB-  
PULPROG zg30  
TD 65536  
SOLVENT CDCl3  
NS 16  
DS 2  
SWH 8223.685 Hz  
FIDRES 0.125483 Hz  
AQ 3.9846387 sec  
RG 203  
DW 60.800 usec  
DE 6.50 usec  
TE 298.0 K  
D1 1.00000000 sec

==== CHANNEL f1 =====  
NUC1 1H  
P1 14.50 usec  
PLW1 12.85299969 W  
SFO1 400.1324710 MHz

F2 - Processing parameters  
SI 65536  
SF 400.1300000 MHz  
WDW EM  
SSB 0  
LB 0.30 Hz  
GB 0  
PC 1.00

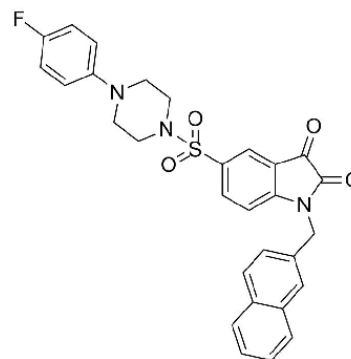

8b3

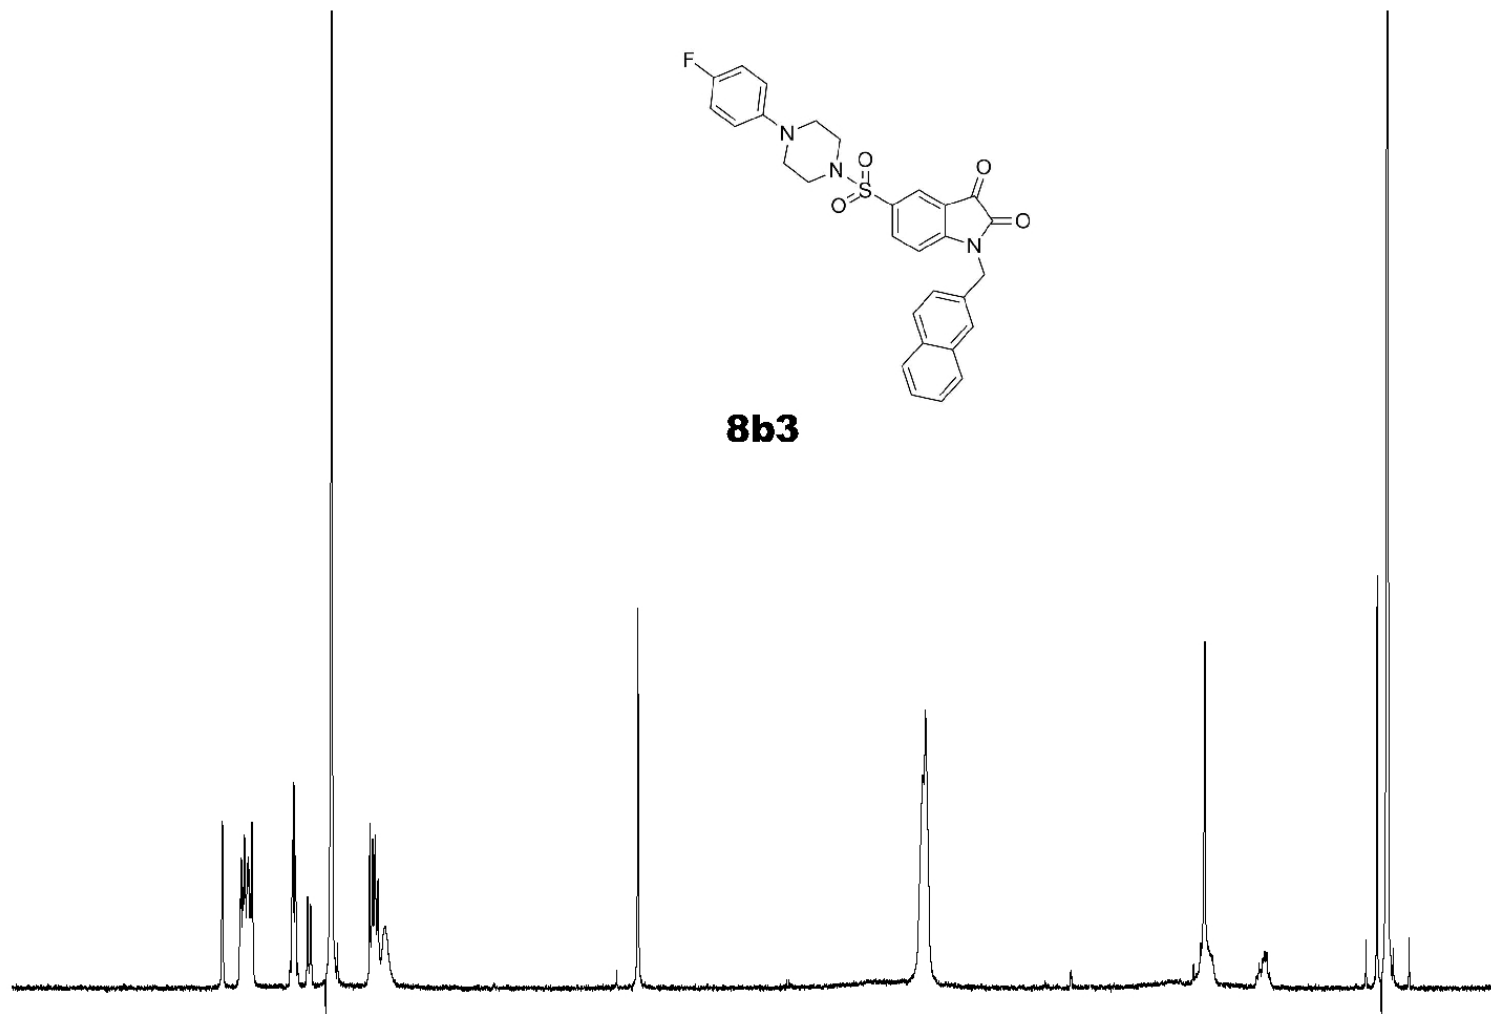

9

1.00  
5.02  
2.21  
1.05  
5.04

6

1.96

4

7.92

2

1

0

ppm

S20120629-034

20120629

PROTON CDCl3 D:\nmr data ham

7.895  
7.878  
7.874  
7.409  
7.394  
7.379  
7.370  
7.363  
7.354  
7.347  
7.284  
7.224  
7.215  
7.210  
7.201  
6.948  
6.927

5.000

3.666

3.081

2.651

0.023



Current Data Parameters  
NAME ZHM-3CLBIANBIAN  
EXPNO 10  
PROCNO 1

F2 - Acquisition Parameters  
Date\_ 20120629  
Time 11.43  
INSTRUM spect  
PROBHD 5 mm PABBO BB-  
PULPROG zg30  
TD 65536  
SOLVENT CDCl3  
NS 16  
DS 2  
SWH 8223.685 Hz  
FIDRES 0.125483 Hz  
AQ 3.9846387 sec  
RG 203  
DW 60.800 usec  
DE 6.50 usec  
TE 298.0 K  
D1 1.00000000 sec

==== CHANNEL f1 =====  
NUC1 1H  
P1 14.50 usec  
PLW1 12.85299969 W  
SFO1 400.1324710 MHz

F2 - Processing parameters  
SI 65536  
SF 400.1300000 MHz  
WDW EM  
SSB 0  
LB 0.30 Hz  
GB 0  
PC 1.00

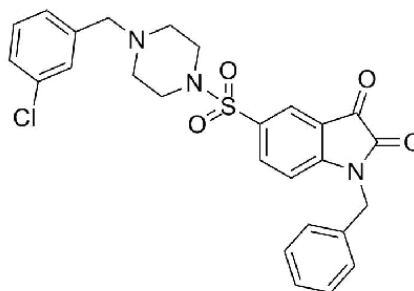

8d2

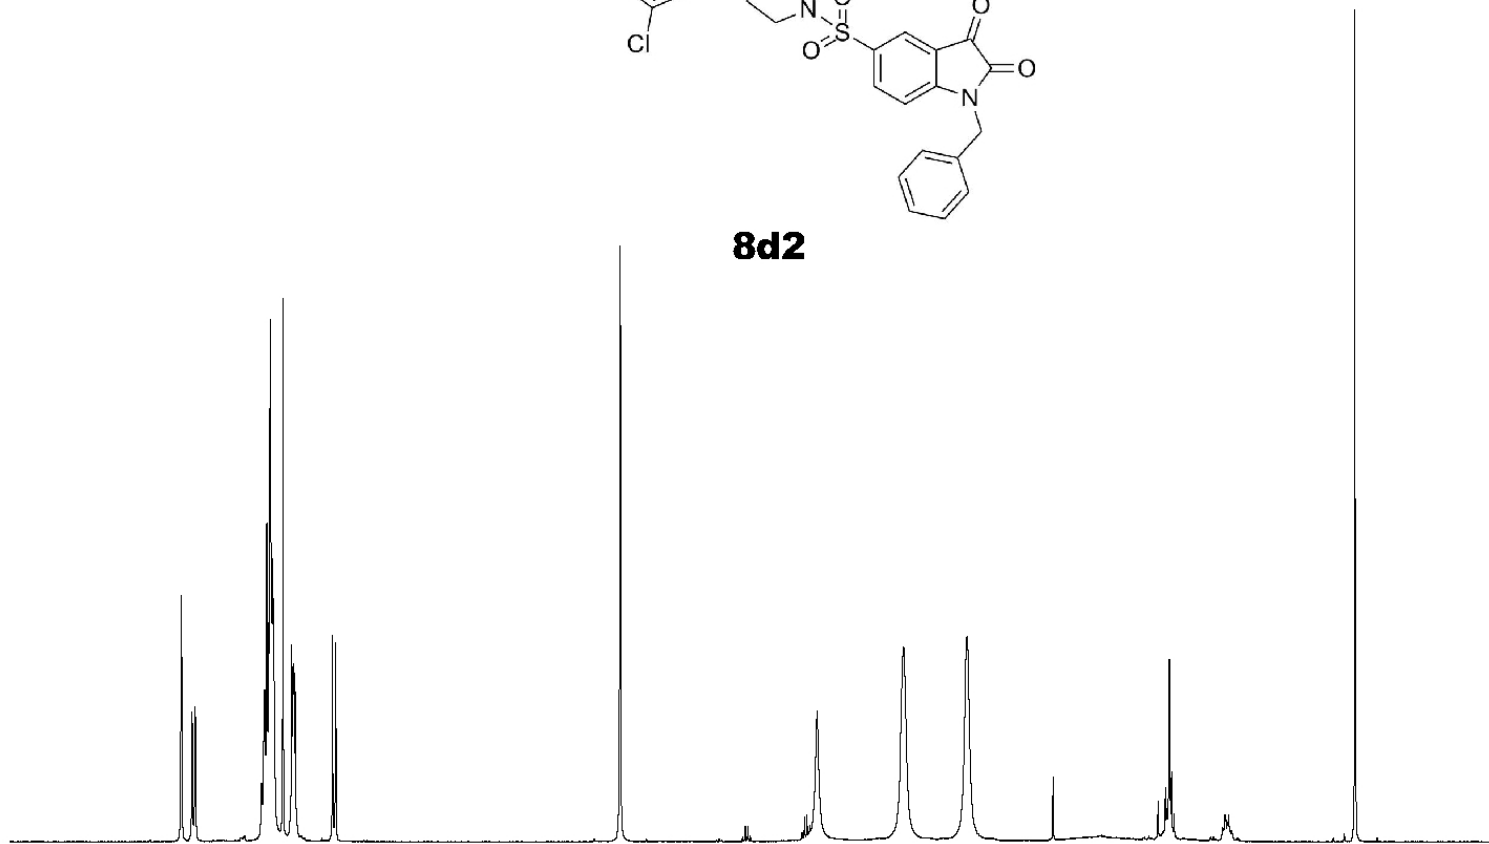

9 8 7 6 5 4 3 2 1 0 ppm

1.00  
1.03  
7.12  
2.04  
1.03  
2.05  
1.90  
3.96  
3.97

S20120629-036

20120629

PROTON CDCl3 D:\nmr data ham

7.868  
7.858  
7.847  
7.828  
7.557  
7.553  
7.544  
7.534  
7.454  
7.451  
7.433  
7.430  
7.284  
7.195  
7.186  
6.992  
6.971  
5.168

3.603  
3.029  
2.592

0.094  
0.032  
0.024  
0.016



Current Data Parameters  
NAME ZHM-3CLBIANNAI2  
EXPNO 10  
PROCNO 1

F2 - Acquisition Parameters  
Date\_ 20120629  
Time 12.09  
INSTRUM spect  
PROBHD 5 mm PABBO BB-  
PULPROG zg30  
TD 65536  
SOLVENT CDCl3  
NS 16  
DS 2  
SWH 8223.685 Hz  
FIDRES 0.125483 Hz  
AQ 3.9846387 sec  
RG 203  
DW 60.800 usec  
DE 6.50 usec  
TE 298.0 K  
D1 1.00000000 sec

==== CHANNEL f1 =====  
NUC1 1H  
P1 14.50 usec  
PLW1 12.85299969 W  
SFO1 400.1324710 MHz

F2 - Processing parameters  
SI 65536  
SF 400.1300000 MHz  
WDW EM  
SSB 0  
LB 0.30 Hz  
GB 0  
PC 1.00

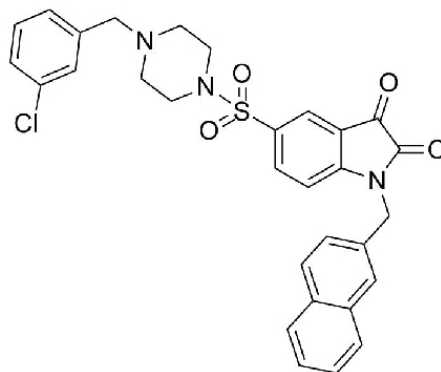

8d3

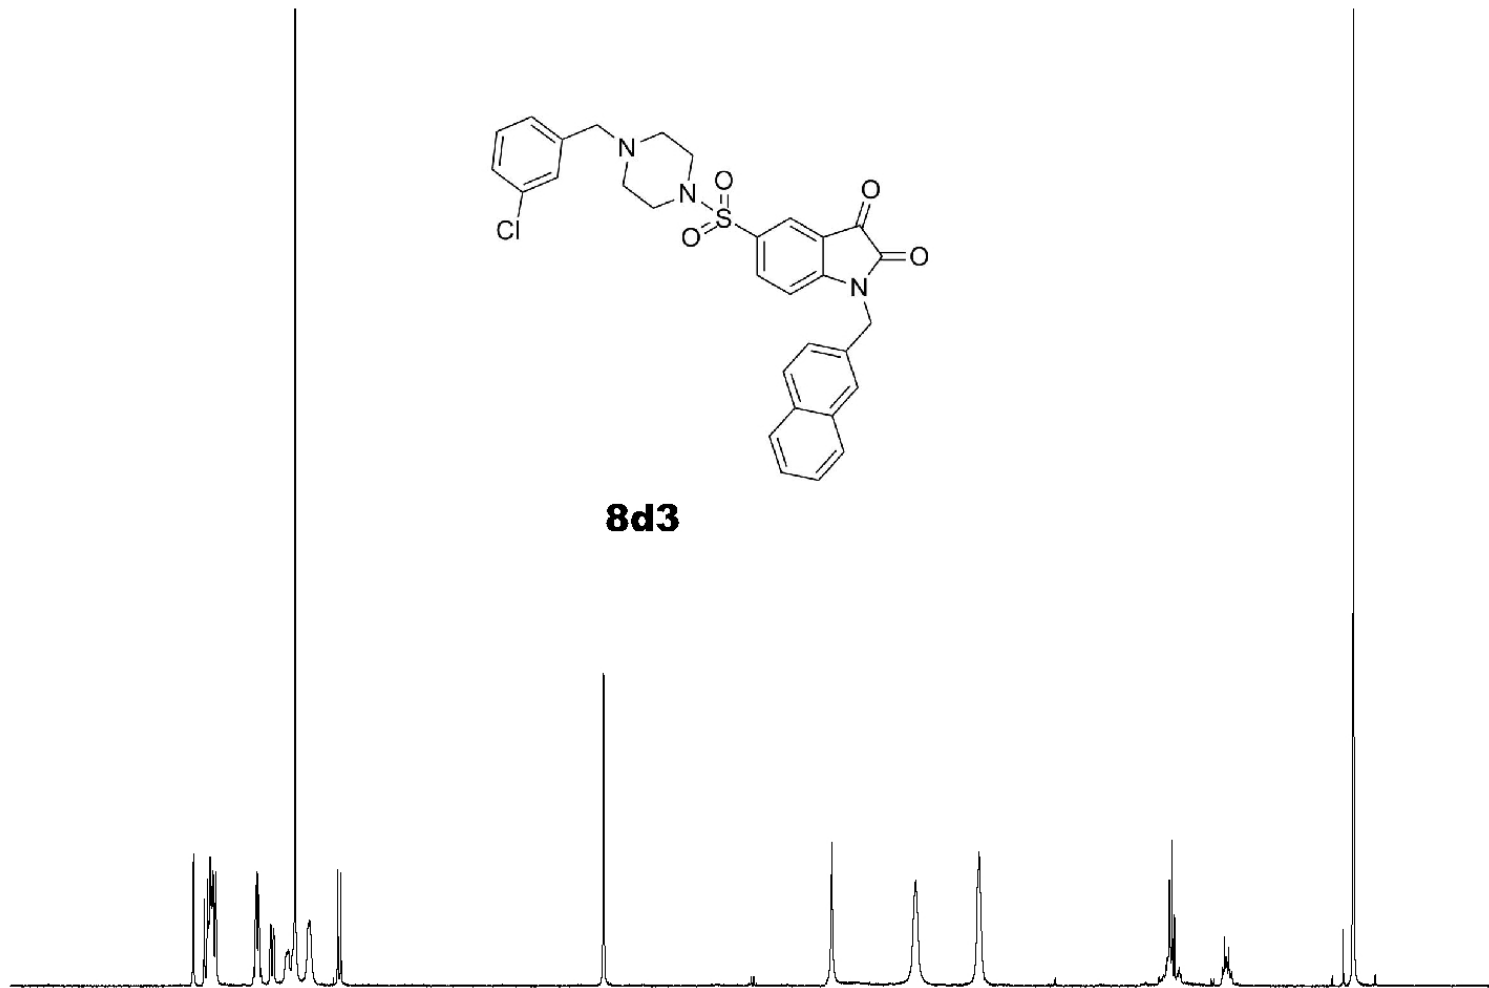

9 8 7 6 5 4 3 2 1 0 ppm

5.19  
1.77  
1.00  
1.16  
1.62  
0.91  
1.74  
1.79  
3.24  
3.19

S20120917-020

20120917

PROTON CDCl3 D:\nmr data ham

8.046  
8.041  
8.025  
8.021  
7.981  
7.977  
7.302  
7.284  
7.266  
7.224  
7.206  
7.177  
7.159  
7.074  
7.053

3.347  
3.094  
2.771  
2.755  
2.745  
2.732  
2.652  
2.641  
2.630  
2.619

0.022



Current Data Parameters  
NAME ZHM-BENYIJIA  
EXPNO 10  
PROCNO 1

F2 - Acquisition Parameters  
Date\_ 20120917  
Time 17.14  
INSTRUM spect  
PROBHD 5 mm PABBO BB-  
PULPROG zg30  
TD 65536  
SOLVENT CDCl3  
NS 16  
DS 2  
SWH 8223.685 Hz  
FIDRES 0.125483 Hz  
AQ 3.9846387 sec  
RG 203  
DW 60.800 usec  
DE 6.50 usec  
TE 298.0 K  
D1 1.00000000 sec

==== CHANNEL f1 =====  
NUC1 1H  
P1 14.50 usec  
PLW1 12.85299969 W  
SFO1 400.1324710 MHz

F2 - Processing parameters  
SI 65536  
SF 400.1300000 MHz  
WDW EM  
SSB 0  
LB 0.30 Hz  
GB 0  
PC 1.00

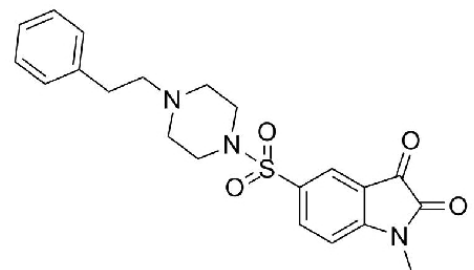

8f1

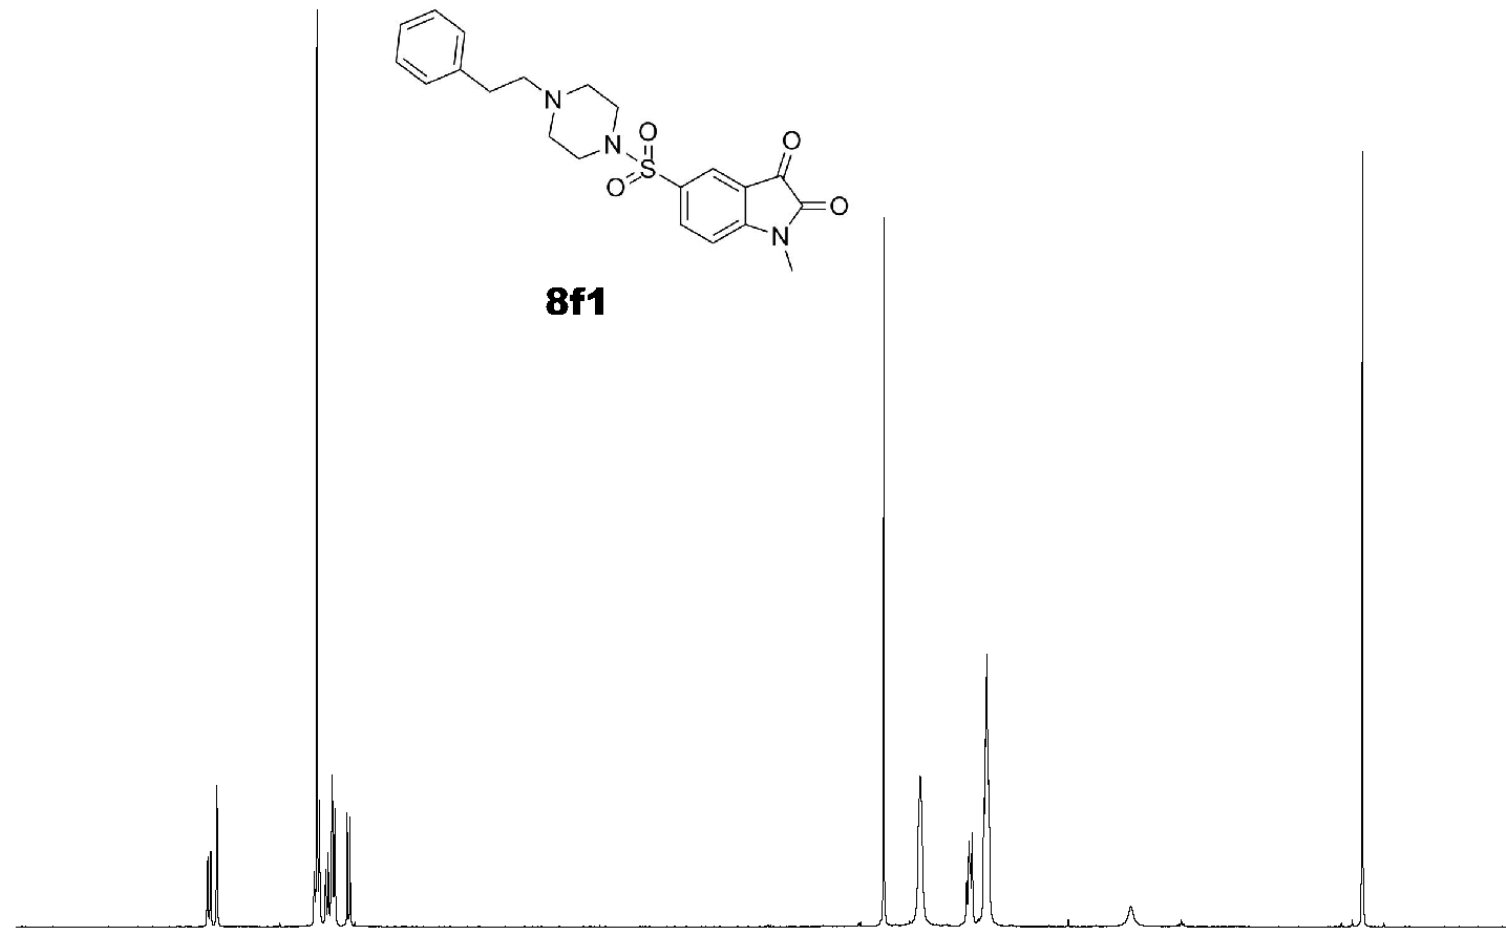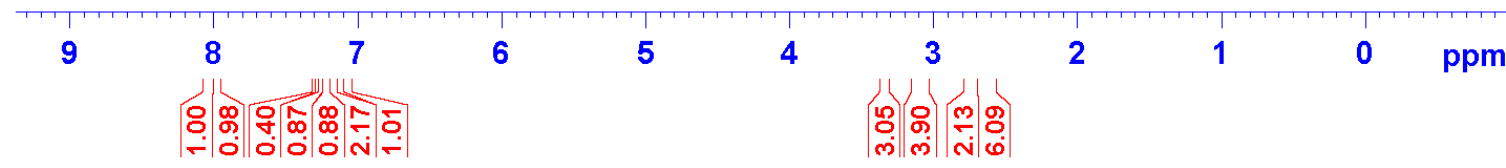

S20120917-023

20120917

PROTON CDCl3 D:\nmr data ham

7.391  
7.376  
7.362  
7.344  
7.297  
7.283  
7.263  
7.222  
7.205  
7.170  
7.152  
6.947  
6.927

5.002

3.058  
2.760  
2.744  
2.722  
2.639  
2.616

0.024



Current Data Parameters  
NAME ZHM-YIBENBIAN  
EXPNO 10  
PROCNO 1

F2 - Acquisition Parameters  
Date\_ 20120917  
Time 17.28  
INSTRUM spect  
PROBHD 5 mm PABBO BB-  
PULPROG zg30  
TD 65536  
SOLVENT CDCl3  
NS 16  
DS 2  
SWH 8223.685 Hz  
FIDRES 0.125483 Hz  
AQ 3.9846387 sec  
RG 90.5  
DW 60.800 usec  
DE 6.50 usec  
TE 298.0 K  
D1 1.00000000 sec

==== CHANNEL f1 =====  
NUC1 1H  
P1 14.50 usec  
PLW1 12.85299969 W  
SFO1 400.1324710 MHz

F2 - Processing parameters  
SI 65536  
SF 400.1300000 MHz  
WDW EM  
SSB 0  
LB 0.30 Hz  
GB 0  
PC 1.00

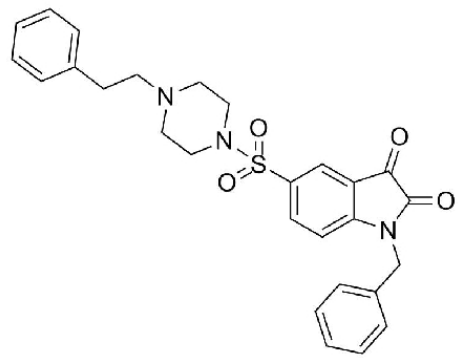

8f2

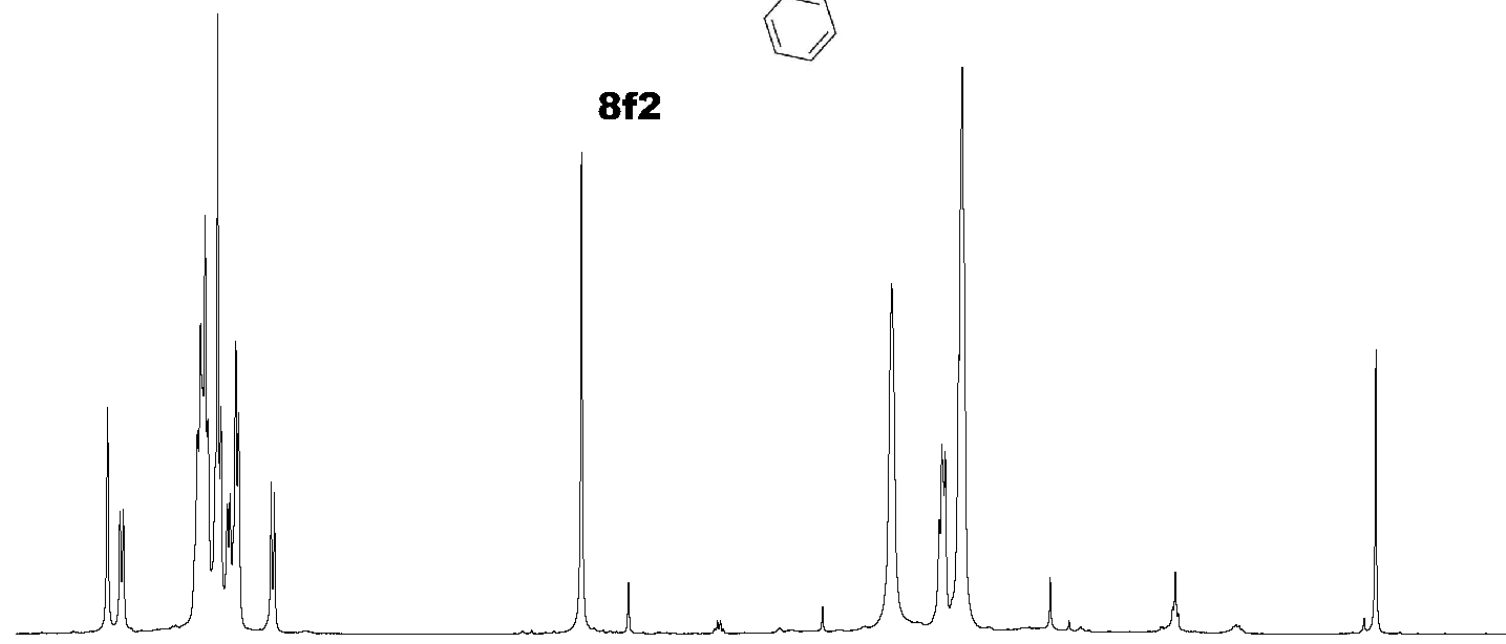

8 7 6 5 4 3 2 1 0 ppm  
1.00 1.02 5.63 3.61 3.31 1.00 1.98 4.11 2.33 6.19

S20120917-021

20120917

PROTON CDCl3 D:\nmr data ham

7.898  
7.869  
7.850  
7.825  
7.544  
7.536  
7.442  
7.422  
7.282  
7.256  
7.218  
7.200  
7.156  
7.138  
6.983  
6.962  
— 5.161

3.028  
2.720  
2.700  
2.592

— 0.029



Current Data Parameters  
NAME ZHM-BENYINAI  
EXPNO 10  
PROCNO 1

F2 - Acquisition Parameters  
Date\_ 20120917  
Time 17.19  
INSTRUM spect  
PROBHD 5 mm PABBO BB-  
PULPROG zg30  
TD 65536  
SOLVENT CDCl3  
NS 16  
DS 2  
SWH 8223.685 Hz  
FIDRES 0.125483 Hz  
AQ 3.9846387 sec  
RG 90.5  
DW 60.800 usec  
DE 6.50 usec  
TE 298.0 K  
D1 1.00000000 sec

==== CHANNEL f1 =====  
NUC1 1H  
P1 14.50 usec  
PLW1 12.85299969 W  
SFO1 400.1324710 MHz

F2 - Processing parameters  
SI 65536  
SF 400.1300000 MHz  
WDW EM  
SSB 0  
LB 0.30 Hz  
GB 0  
PC 1.00

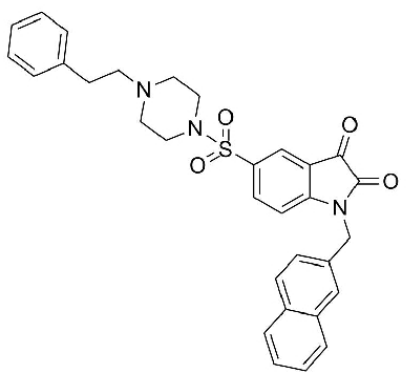

8f3

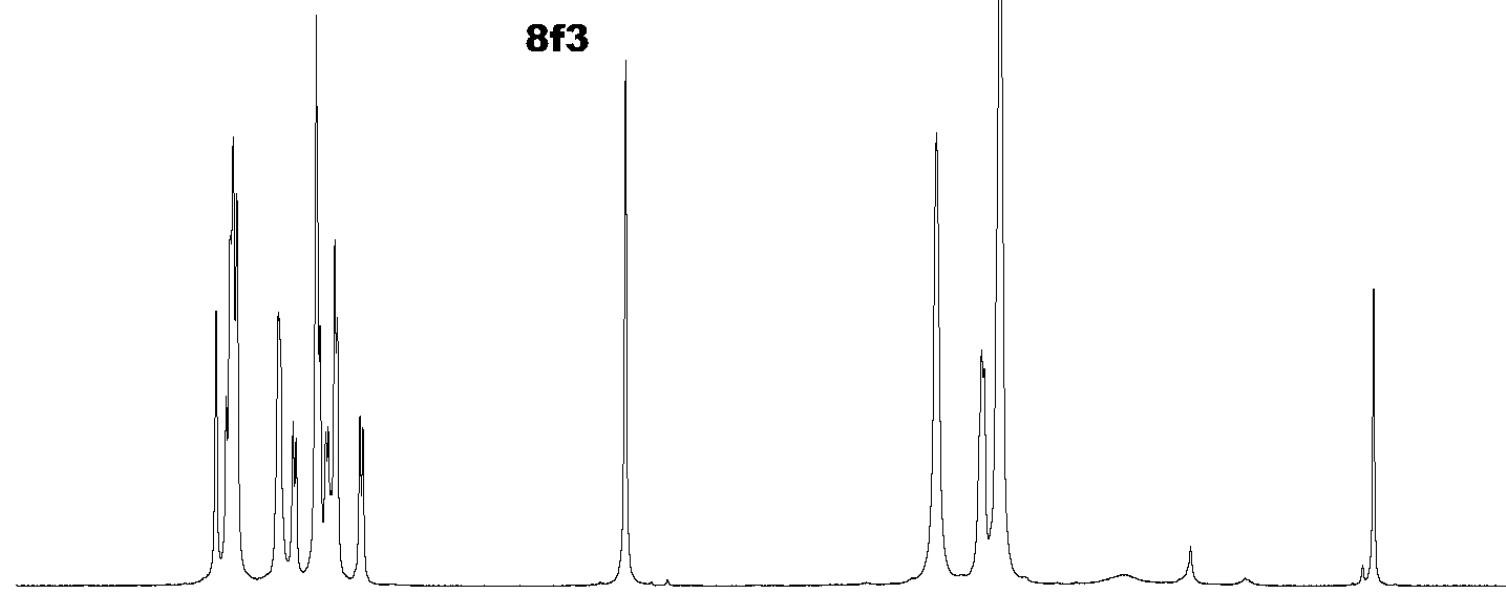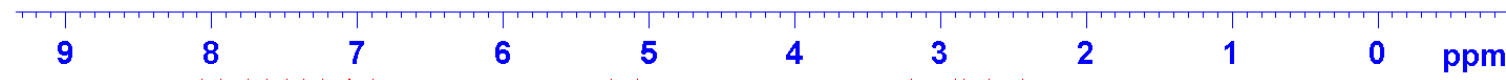

1.03  
4.87  
1.99  
1.10  
3.15  
2.96  
1.00

1.88

3.86  
2.16  
5.74

S20130320-002

20130320

PROTON DMSO D:\nmr\data/ham

8.029  
8.013  
8.008  
7.734  
7.730  
7.530  
7.526  
7.508  
7.491  
7.487  
7.368  
7.347  
6.820  
6.799  
6.648  
6.635  
6.631  
6.618

3.622  
3.612  
3.600  
3.325  
3.173  
3.130  
2.996  
2.985  
2.974  
2.893  
2.505



Current Data Parameters  
NAME ZHM-BIJIA  
EXPNO 10  
PROCNO 1

F2 - Acquisition Parameters  
Date\_ 20130320  
Time\_ 11.03  
INSTRUM spect  
PROBHD 5 mm PABBO BB-  
PULPROG zg30  
TD 65536  
SOLVENT DMSO  
NS 16  
DS 2  
SWH 8223.685 Hz  
FIDRES 0.125483 Hz  
AQ 3.9846387 sec  
RG 203  
DW 60.800 usec  
DE 6.50 usec  
TE 298.1 K  
D1 1.00000000 sec

==== CHANNEL f1 =====  
NUC1 1H  
P1 14.50 usec  
PLW1 12.85299969 W  
SFO1 400.1324710 MHz

F2 - Processing parameters  
SI 65536  
SF 400.1300000 MHz  
WDW EM  
SSB 0  
LB 0.30 Hz  
GB 0  
PC 1.00

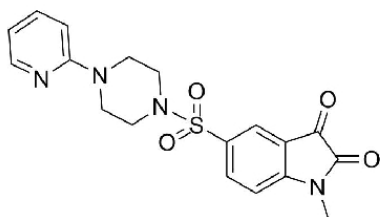

8h1

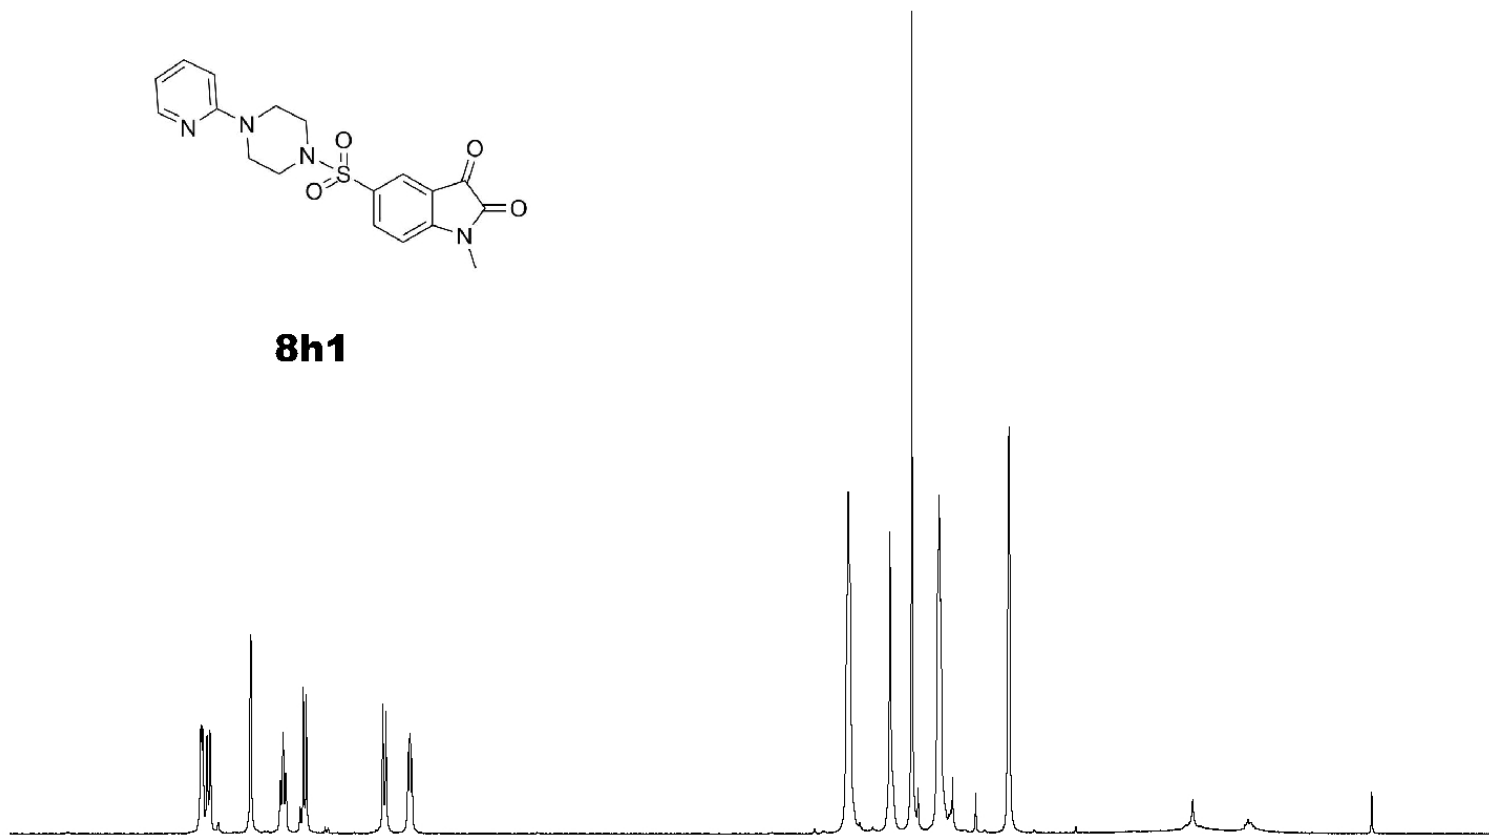

0.95  
0.91  
0.98  
1.00  
0.87  
1.00  
1.00

3.85  
2.67  
3.87

9 8 7 6 5 4 3 2 1 0 ppm



S20130122-010

20130122

PROTON CDC13 D:\nmr data ham

7.918  
7.901  
7.897  
7.492  
7.396  
7.392  
7.388  
7.384  
7.374  
7.362  
7.352  
7.333  
7.284  
6.952  
6.931  
6.669  
6.664  
6.625  
6.603  
4.988

3.680  
3.668  
3.655  
3.124  
2.979  
2.905

1.275

0.021

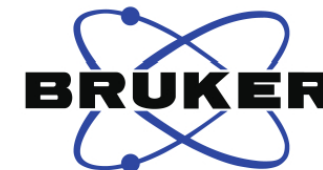

Current Data Parameters  
NAME ZHM-BIBIAN  
EXPNO 10  
PROCNO 1

F2 - Acquisition Parameters  
Date\_ 20130122  
Time 19.45  
INSTRUM spect  
PROBHD 5 mm PABBO BB-  
PULPROG zg30  
TD 65536  
SOLVENT CDCl3  
NS 16  
DS 2  
SWH 8223.685 Hz  
FIDRES 0.125483 Hz  
AQ 3.9846387 sec  
RG 203  
DW 60.800 usec  
DE 6.50 usec  
TE 296.4 K  
D1 1.00000000 sec

==== CHANNEL f1 =====  
NUC1 1H  
P1 14.50 usec  
PLW1 12.85299969 W  
SFO1 400.1324710 MHz

F2 - Processing parameters  
SI 65536  
SF 400.1300000 MHz  
WDB EM  
SSB 0  
LB 0.30 Hz  
GB 0  
PC 1.00

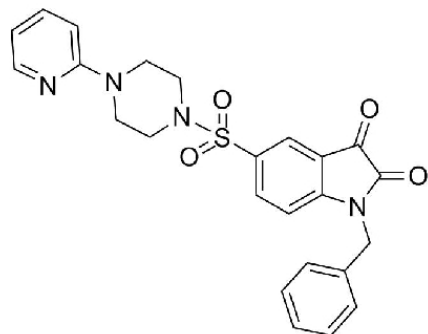

8h2

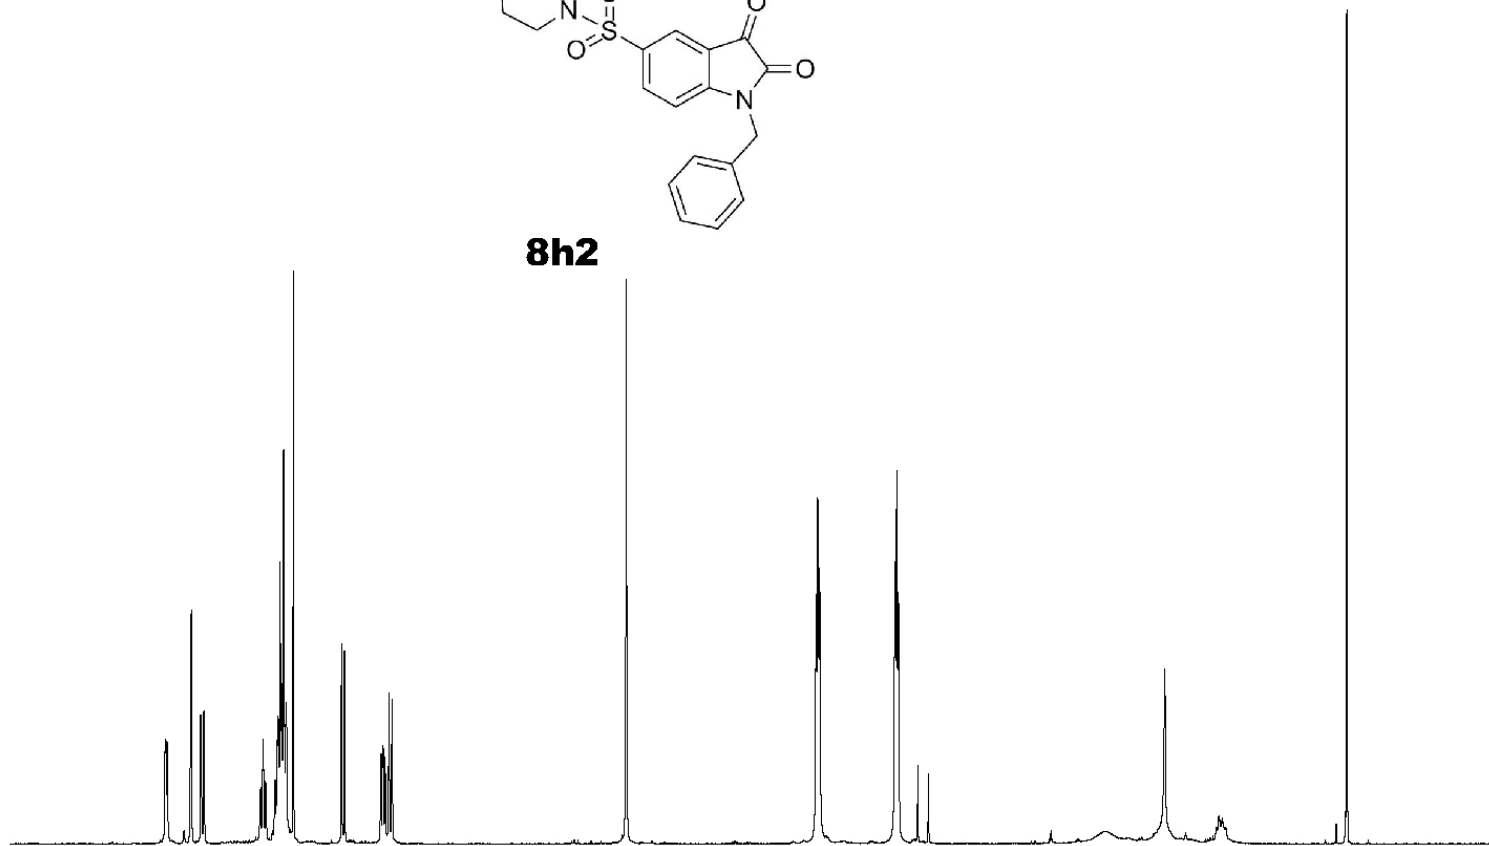

9 8 7 6 5 4 3 2 1 0 ppm

1.00  
0.90  
0.94  
1.10  
5.13  
0.93  
1.03  
0.98  
1.91  
3.90  
3.89

S20130320-003

20130320

PROTON DMSO D:\nmr data ham

7.879  
7.838  
7.829  
7.815  
7.797  
7.576  
7.555  
7.518  
7.508  
7.497  
7.485  
7.199  
7.178  
7.165  
6.793  
6.771  
6.645  
6.632  
6.628  
6.615  
5.121  
3.578  
3.567  
3.332  
3.309  
2.973  
2.962  
2.505  
2.301



Current Data Parameters  
NAME ZHM-BIBIAN  
EXPNO 10  
PROCNO 1

F2 - Acquisition Parameters  
Date\_ 20130320  
Time 11.07  
INSTRUM spect  
PROBHD 5 mm PABBO BB-  
PULPROG zg30  
TD 65536  
SOLVENT DMSO  
NS 16  
DS 2  
SWH 8223.685 Hz  
FIDRES 0.125483 Hz  
AQ 3.9846387 sec  
RG 144  
DW 60.800 usec  
DE 6.50 usec  
TE 298.0 K  
D1 1.0000000 sec

==== CHANNEL f1 =====  
NUC1 1H  
P1 14.50 usec  
PLW1 12.85299969 W  
SFO1 400.1324710 MHz

F2 - Processing parameters  
SI 65536  
SF 400.1300000 MHz  
WDW EM  
SSB 0  
LB 0.30 Hz  
GB 0  
PC 1.00

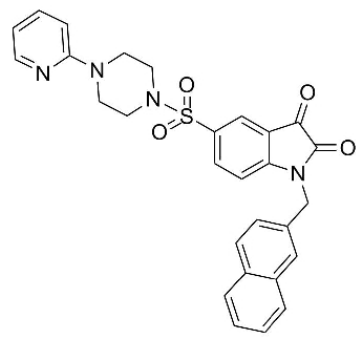

8h3

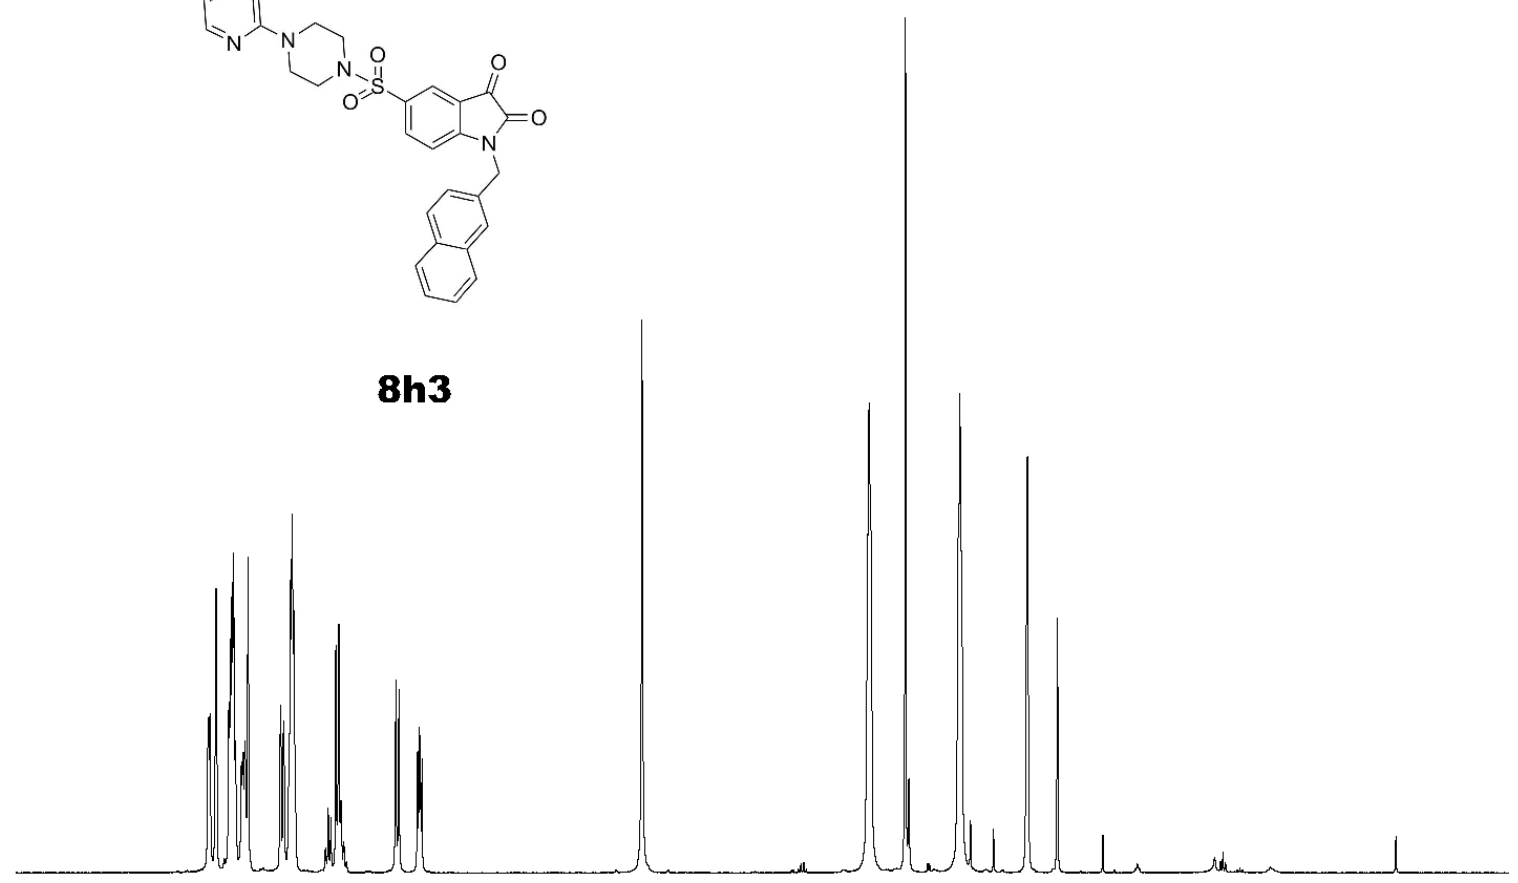

9 8 7 6 5 4 3 2 1 0 ppm

1.00  
1.03  
3.03  
2.04  
1.02  
2.99  
1.91  
1.00  
1.00  
1.97  
4.02  
3.97  
0.60

S20120618-050

20120618

PROTON CDCl3 D:\nmr data ham

7.985  
7.981  
7.923  
7.918  
7.902  
7.897  
7.406  
7.393  
7.377  
7.366  
7.359  
7.283  
6.954  
6.933

4.998

3.021  
3.007  
2.994  
1.680  
1.666  
1.652  
1.638  
1.582  
1.473  
1.459  
1.444

0.030  
0.022



Current Data Parameters  
NAME ZHM-PAINAI  
EXPNO 10  
PROCNO 1

F2 - Acquisition Parameters  
Date\_ 20120618  
Time 10.59  
INSTRUM spect  
PROBHD 5 mm PABBO BB-  
PULPROG zg30  
TD 65536  
SOLVENT CDCl3  
NS 16  
DS 2  
SWH 8223.685 Hz  
FIDRES 0.125483 Hz  
AQ 3.9846387 sec  
RG 203  
DW 60.800 usec  
DE 6.50 usec  
TE 298.0 K  
D1 1.00000000 sec

==== CHANNEL f1 =====  
NUC1 1H  
P1 14.50 usec  
PLW1 12.85299969 W  
SFO1 400.1324710 MHz

F2 - Processing parameters  
SI 65536  
SF 400.1300000 MHz  
WDW EM  
SSB 0  
LB 0.30 Hz  
GB 0  
PC 1.00

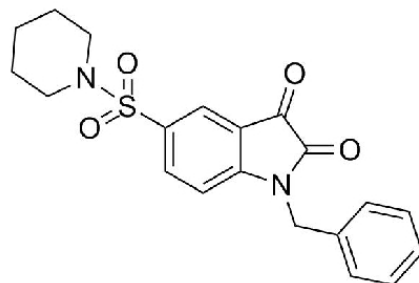

8i2

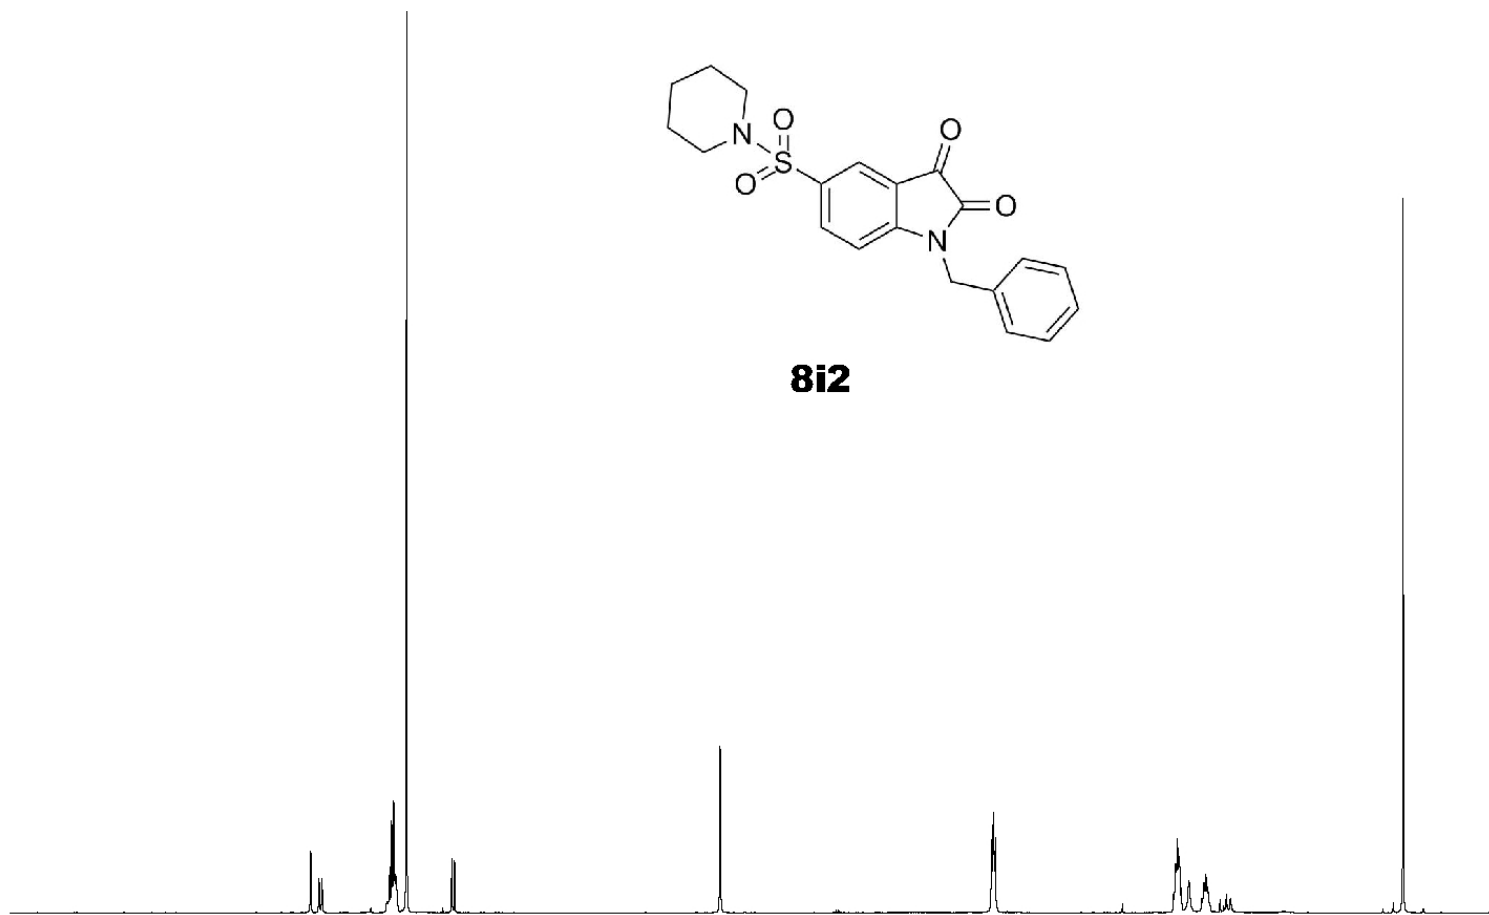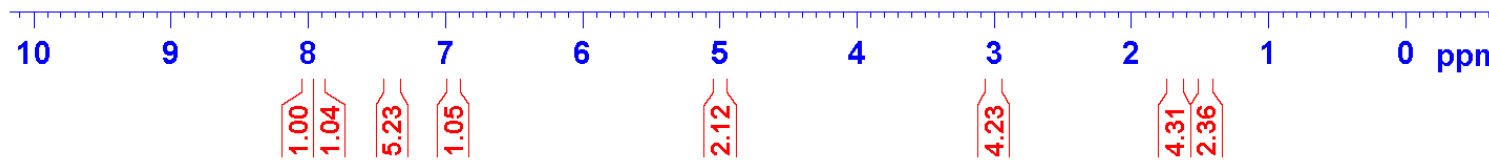

S20120618-049

20120618

PROTON CDCl3 D:\nmr data ham

7.881 7.869 7.865 7.857 7.839 7.560 7.556 7.547 7.537 7.463 7.459 7.442 7.438 7.283 7.000 6.979 5.163 2.996 2.983 2.969 1.659 1.645 1.631 1.567 1.446 1.438 1.435 0.031 0.023

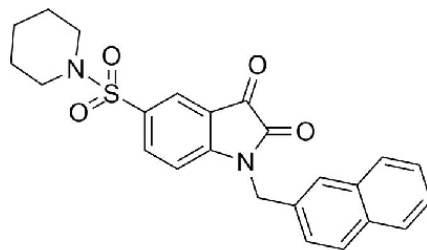

8i3

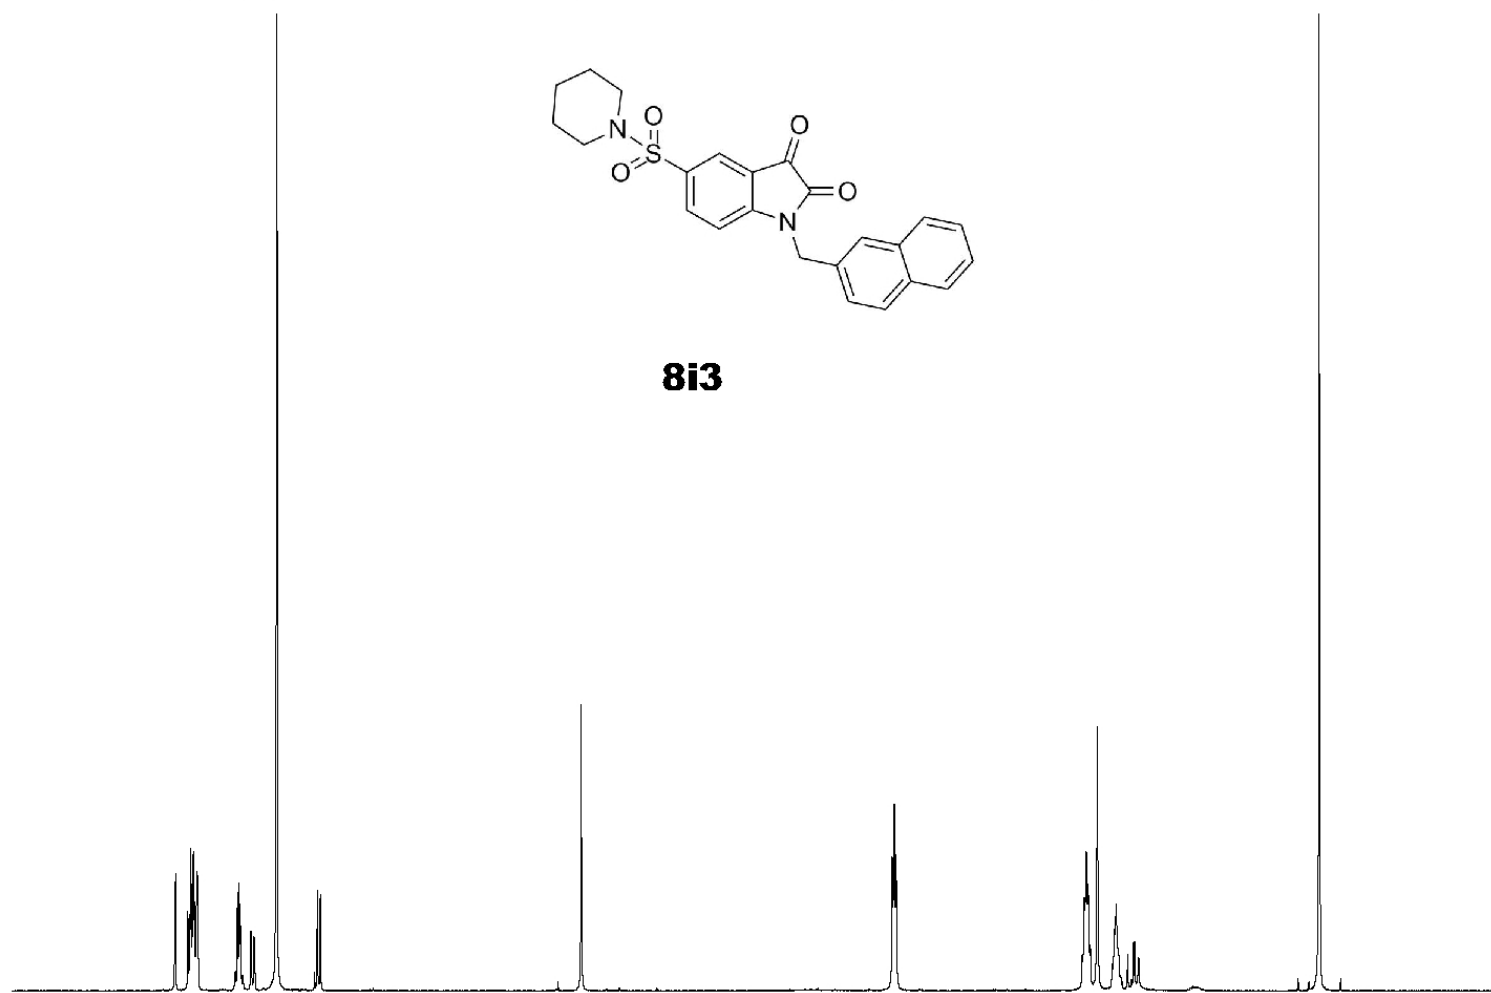

0.96 5.00 2.06 1.00 0.99 1.99 3.96 4.02 2.32



Current Data Parameters  
NAME ZHM-PAIBIAN2  
EXPNO 10  
PROCNO 1

F2 - Acquisition Parameters  
Date\_ 20120618  
Time 10.54  
INSTRUM spect  
PROBHD 5 mm PABBO BB-  
PULPROG zg30  
TD 65536  
SOLVENT CDCl3  
NS 16  
DS 2  
SWH 8223.685 Hz  
FIDRES 0.125483 Hz  
AQ 3.9846387 sec  
RG 203  
DW 60.800 usec  
DE 6.50 usec  
TE 298.0 K  
D1 1.00000000 sec

==== CHANNEL f1 =====  
NUC1 1H  
P1 14.50 usec  
PLW1 12.85299969 W  
SFO1 400.1324710 MHz

F2 - Processing parameters  
SI 65536  
SF 400.1300000 MHz  
WDW EM  
SSB 0  
LB 0.30 Hz  
GB 0  
PC 1.00

S20111026-005

1H CDCL3

20111026

8.052  
8.048  
8.031  
8.028  
7.986  
7.982  
7.285  
7.267  
7.098  
7.078

3.795  
3.783  
3.772  
3.358  
3.341  
3.060  
3.049  
3.037

0.092

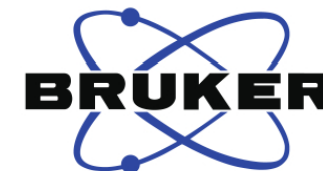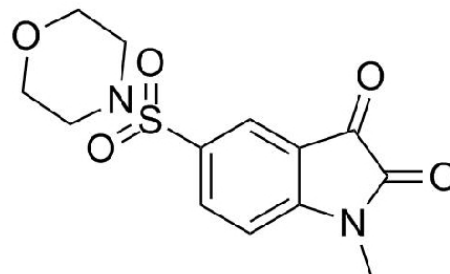

8j1

Current Data Parameters  
NAME ZHM-MALINJIAJI  
EXPNO 1  
PROCNO 1

F2 - Acquisition Parameters  
Date\_ 20111026  
Time 16.42  
INSTRUM spect  
PROBHD 5 mm PABBO BB-  
PULPROG zg30  
TD 65536  
SOLVENT CDCL3  
NS 16  
DS 2  
SWH 8223.685 Hz  
FIDRES 0.125483 Hz  
AQ 3.9846387 sec  
RG 203  
DW 60.800 usec  
DE 6.50 usec  
TE 299.3 K  
D1 1.00000000 sec

==== CHANNEL f1 =====  
NUC1 1H  
P1 14.68 usec  
PLW1 12.85299969 W  
SFO1 400.1324710 MHz

F2 - Processing parameters  
SI 65536  
SF 400.1300000 MHz  
WDW EM  
SSB 0  
LB 0.30 Hz  
GB 0  
PC 1.00

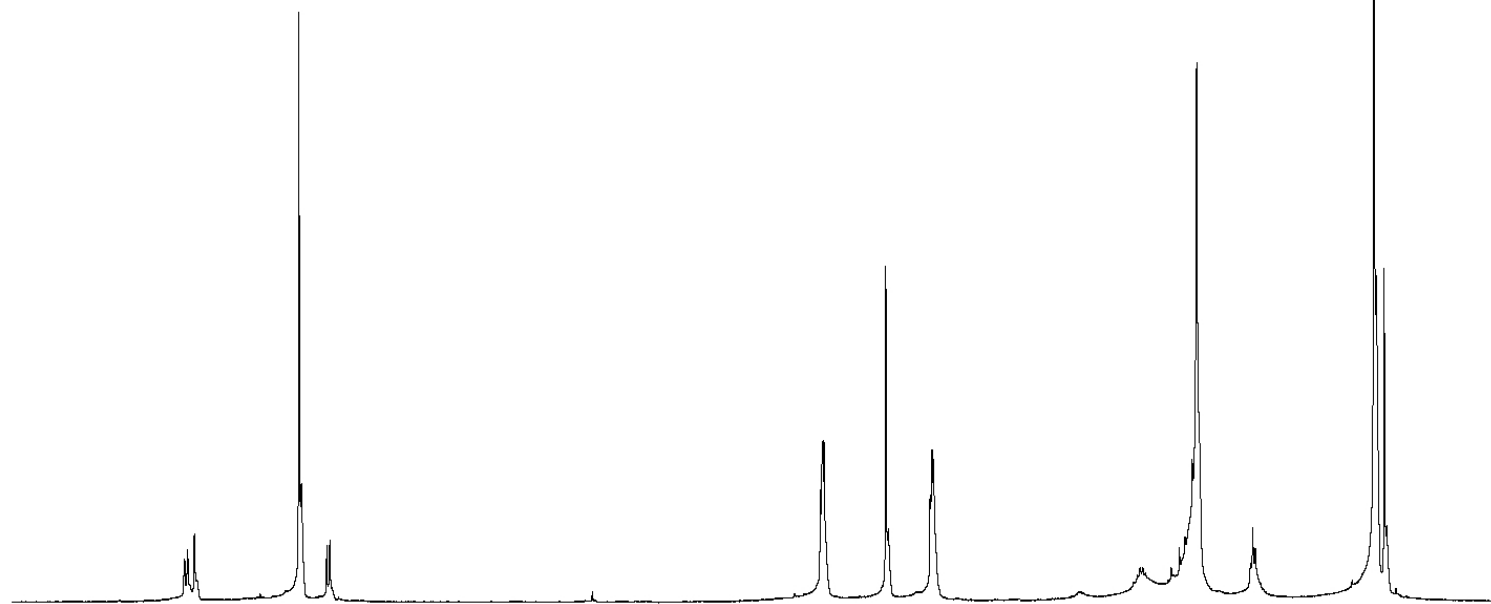

9 8 7 6 5 4 3 2 1 0 ppm

1.04  
0.90

1.08

4.29

3.00

4.08

S20120525-014

20120525

PROTON CDC13 D:\nmr data ham

7.987  
7.914  
7.893  
7.740  
7.726  
7.562  
7.553  
7.547  
7.413  
7.409  
7.396  
7.384  
7.372  
7.352  
7.284  
6.975  
6.954

5.012

3.772  
3.761  
3.752  
3.735  
3.717  
3.030  
3.018  
3.007

0.092  
0.021

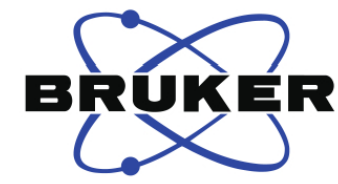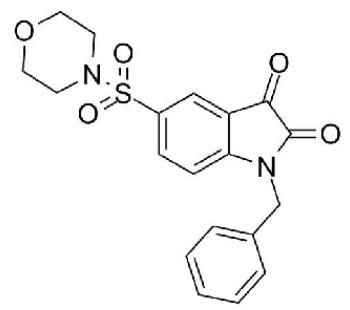

8j2

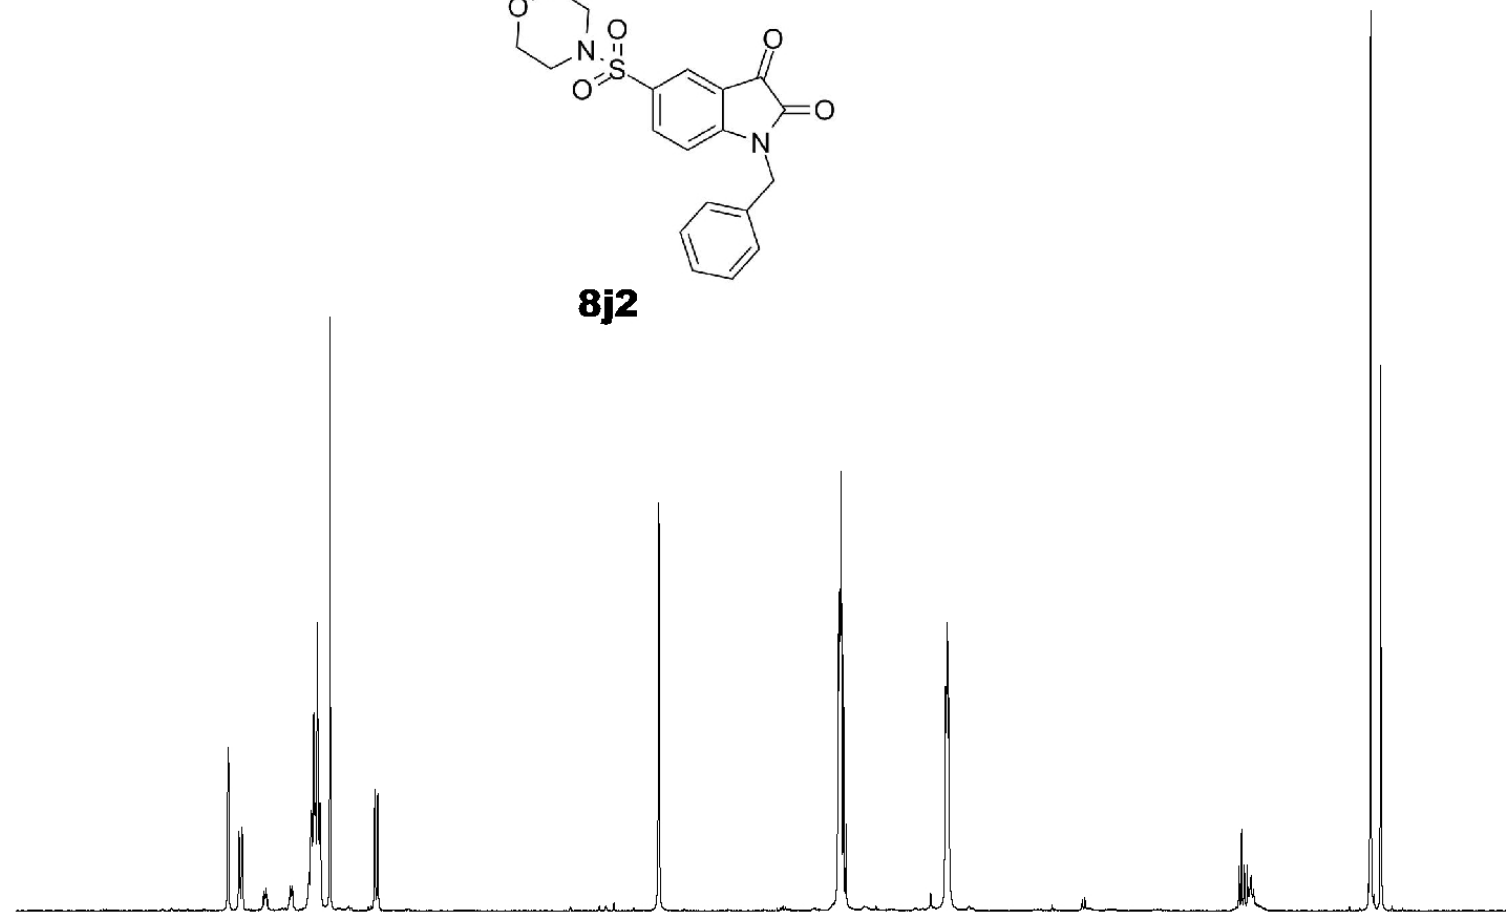

1.00  
1.00  
0.31  
0.36  
5.32  
1.03

2.01

6.63

4.25

Current Data Parameters  
NAME ZHM-MABIAN  
EXPNO 10  
PROCNO 1

F2 - Acquisition Parameters  
Date\_ 20120525  
Time 11.38  
INSTRUM spect  
PROBHD 5 mm PABBO BB-  
PULPROG zg30  
TD 65536  
SOLVENT CDCl3  
NS 16  
DS 2  
SWH 8223.685 Hz  
FIDRES 0.125483 Hz  
AQ 3.9846387 sec  
RG 203  
DW 60.800 usec  
DE 6.50 usec  
TE 298.0 K  
D1 1.00000000 sec

==== CHANNEL f1 =====  
NUC1 1H  
P1 14.50 usec  
PLW1 12.85299969 W  
SFO1 400.1324710 MHz

F2 - Processing parameters  
SI 65536  
SF 400.1300000 MHz  
WDW EM  
SSB 0  
LB 0.30 Hz  
GB 0  
PC 1.00

9 8 7 6 5 4 3 2 1 0 ppm

S20120531-008

20120531

PROTON CDC13 D:\nmr data ham

7.985  
7.903  
7.881  
7.865  
7.854  
7.833  
7.554  
7.545  
7.535  
7.451  
7.430  
7.284  
7.016  
6.996

5.174

3.737

2.990

0.095  
0.024

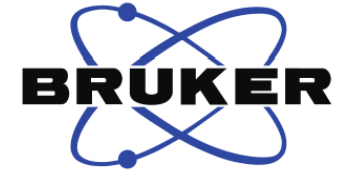

Current Data Parameters  
NAME ZHM-MANAI  
EXPNO 10  
PROCNO 1

F2 - Acquisition Parameters  
Date\_ 20120531  
Time 12.49  
INSTRUM spect  
PROBHD 5 mm PABBO BB-  
PULPROG zg30  
TD 65536  
SOLVENT CDCl3  
NS 16  
DS 2  
SWH 8223.685 Hz  
FIDRES 0.125483 Hz  
AQ 3.9846387 sec  
RG 203  
DW 60.800 usec  
DE 6.50 usec  
TE 298.0 K  
D1 1.00000000 sec

==== CHANNEL f1 =====  
NUC1 1H  
P1 14.50 usec  
PLW1 12.85299969 W  
SFO1 400.1324710 MHz

F2 - Processing parameters  
SI 65536  
SF 400.1300000 MHz  
WDW EM  
SSB 0  
LB 0.30 Hz  
GB 0  
PC 1.00

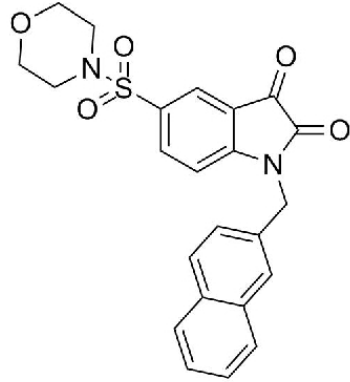

8j3

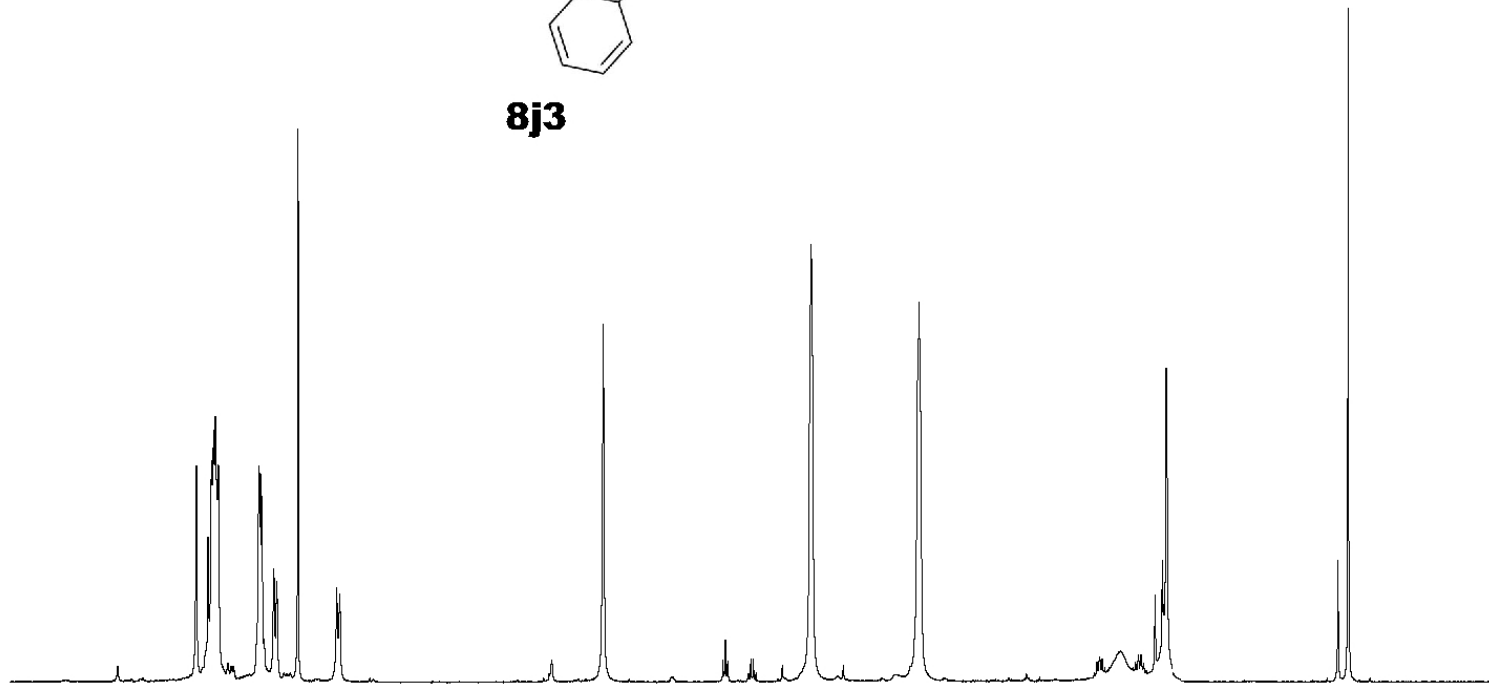

9 8 7 6 5 4 3 2 1 0 ppm

1.15  
6.05  
2.64  
1.18  
1.00

2.03

4.93

4.81

S20120903-005

20120903

PROTON CDCl3 D:\nmr data ham



Current Data Parameters  
NAME ZHM-4JIA  
EXPNO 10  
PROCNO 1

F2 - Acquisition Parameters  
Date\_ 20120903  
Time 10.51  
INSTRUM spect  
PROBHD 5 mm PABBO BB-  
PULPROG zg30  
TD 65536  
SOLVENT CDCl3  
NS 16  
DS 2  
SWH 8223.685 Hz  
FIDRES 0.125483 Hz  
AQ 3.9846387 sec  
RG 203  
DW 60.800 usec  
DE 6.50 usec  
TE 298.0 K  
D1 1.00000000 sec

==== CHANNEL f1 =====  
NUC1 1H  
P1 14.50 usec  
PLW1 12.85299969 W  
SFO1 400.1324710 MHz

F2 - Processing parameters  
SI 65536  
SF 400.1300000 MHz  
WDW EM  
SSB 0  
LB 0.30 Hz  
GB 0  
PC 1.00

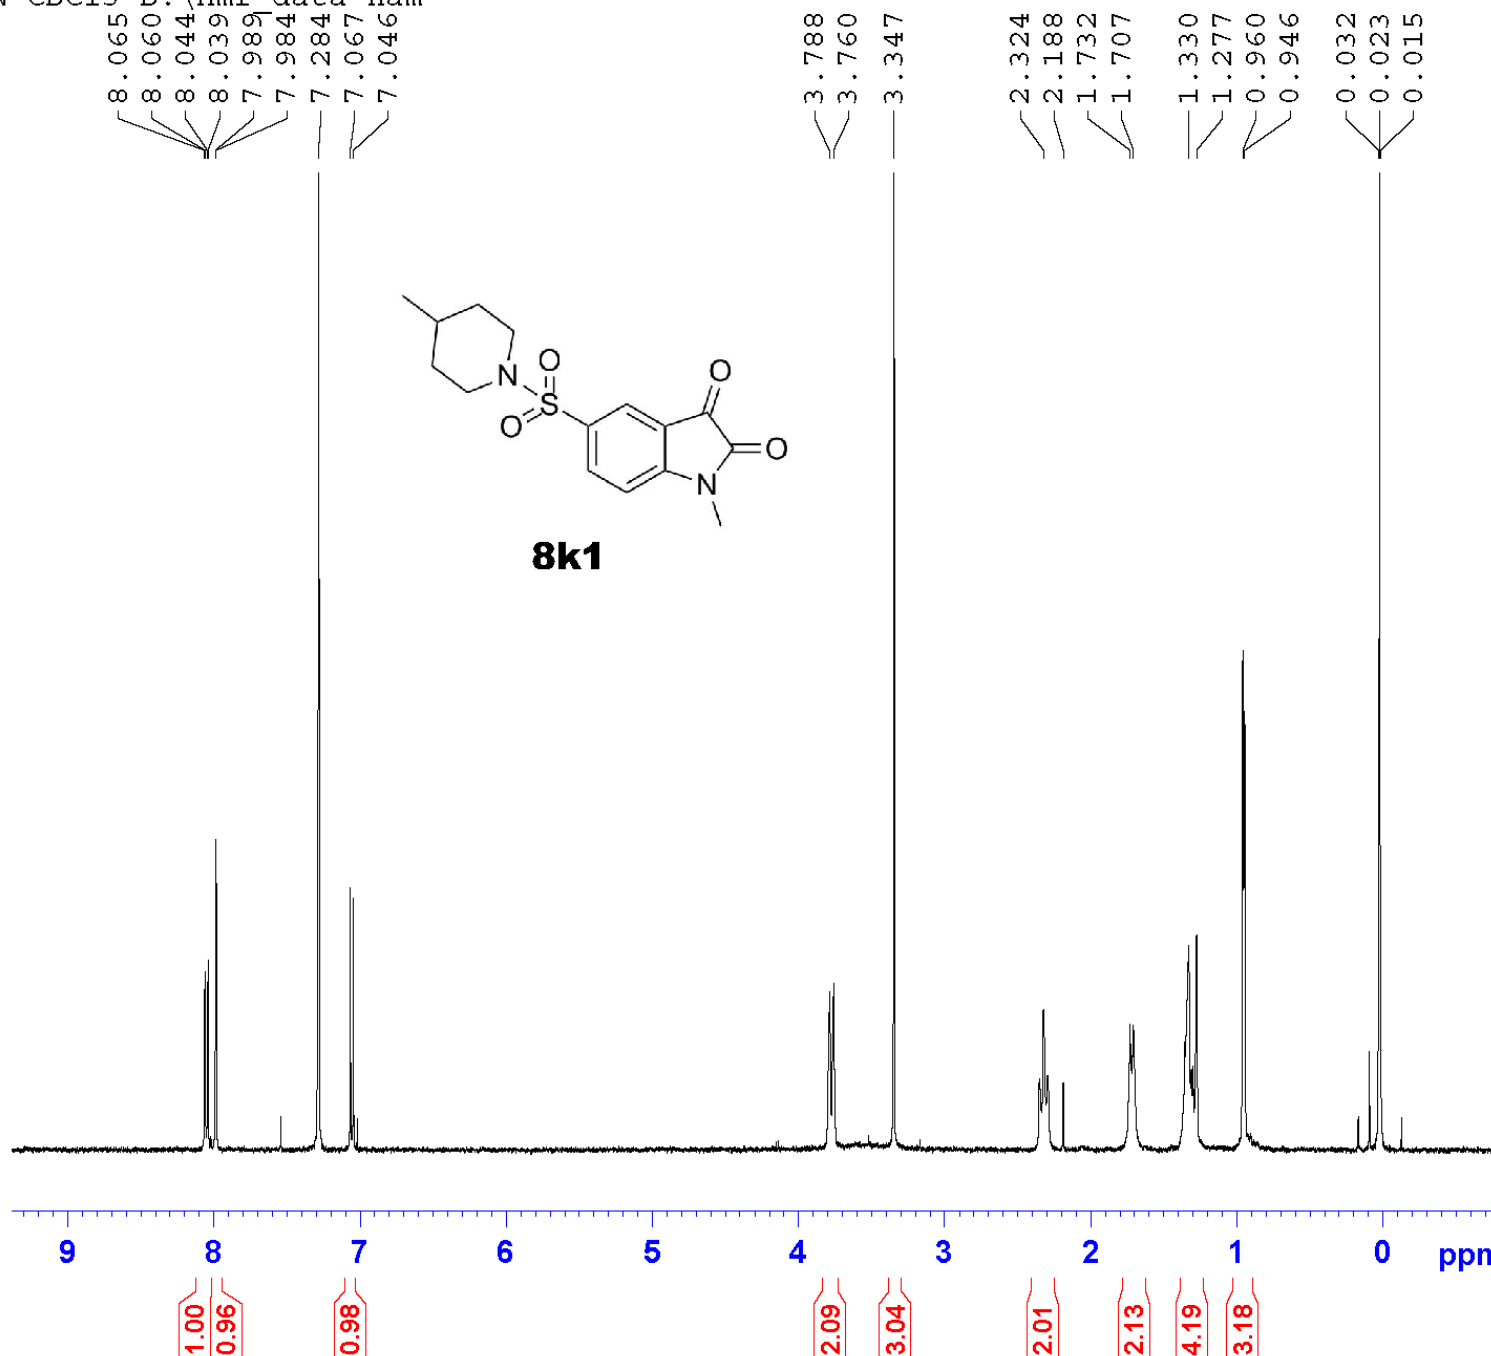



S20120605-030

20120605

PROTON CDC13 D:\nmr data ham

7.972  
7.968  
7.912  
7.908  
7.891  
7.887  
7.401  
7.386  
7.373  
7.365  
7.360  
7.356  
7.284  
6.955  
6.934

— 4.996

< 3.742  
< 3.714

— 2.297

< 1.705  
< 1.680  
< 1.311  
< 1.304  
< 0.941  
< 0.927

— 0.020

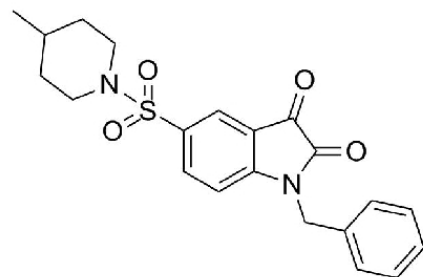

8k2

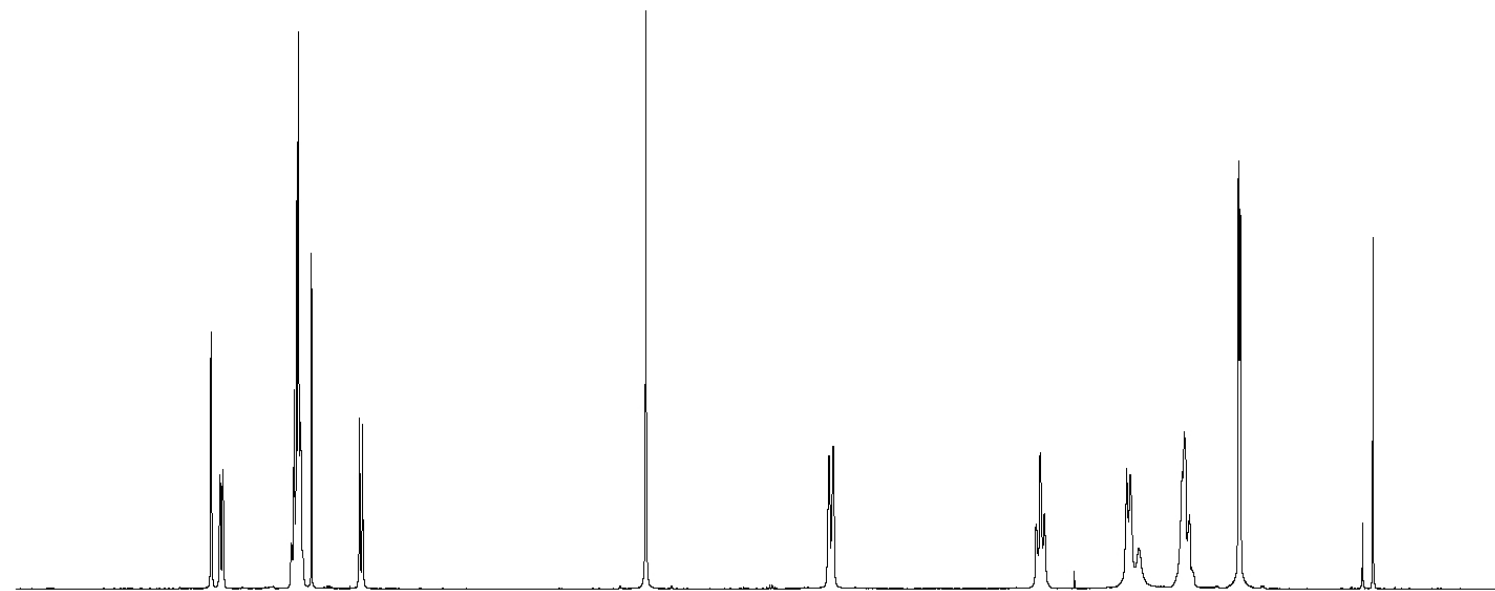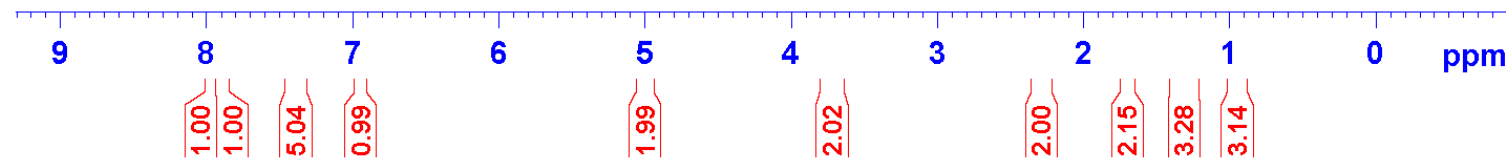

Current Data Parameters  
NAME ZHM-4JIABIAN  
EXPNO 10  
PROCNO 1

F2 - Acquisition Parameters  
Date\_ 20120606  
Time 0.30  
INSTRUM spect  
PROBHD 5 mm PABBO BB-  
PULPROG zg30  
TD 65536  
SOLVENT CDCl3  
NS 16  
DS 2  
SWH 8223.685 Hz  
FIDRES 0.125483 Hz  
AQ 3.9846387 sec  
RG 144  
DW 60.800 usec  
DE 6.50 usec  
TE 298.6 K  
D1 1.00000000 sec

==== CHANNEL f1 =====  
NUC1 1H  
P1 14.50 usec  
PLW1 12.85299969 W  
SFO1 400.1324710 MHz

F2 - Processing parameters  
SI 65536  
SF 400.1300000 MHz  
WDW EM  
SSB 0  
LB 0.30 Hz  
GB 0  
PC 1.00

S20120531-009

20120531

PROTON CDC13 D:\nmr data ham

7.892  
7.887  
7.880  
7.871  
7.866  
7.857  
7.835  
7.560  
7.556  
7.547  
7.537  
7.462  
7.458  
7.284  
6.999  
6.978

5.164

3.729  
3.701

2.273  
2.069  
1.686  
1.662  
1.301  
1.291  
1.284  
0.925  
0.912

0.032  
0.024



Current Data Parameters  
NAME ZHM-4JIANAI  
EXPNO 10  
PROCNO 1

F2 - Acquisition Parameters  
Date\_ 20120531  
Time 12.54  
INSTRUM spect  
PROBHD 5 mm PABBO BB-  
PULPROG zg30  
TD 65536  
SOLVENT CDCl3  
NS 16  
DS 2  
SWH 8223.685 Hz  
FIDRES 0.125483 Hz  
AQ 3.9846387 sec  
RG 203  
DW 60.800 usec  
DE 6.50 usec  
TE 298.0 K  
D1 1.00000000 sec

==== CHANNEL f1 =====  
NUC1 1H  
P1 14.50 usec  
PLW1 12.85299969 W  
SFO1 400.1324710 MHz

F2 - Processing parameters  
SI 65536  
SF 400.1300000 MHz  
WDW EM  
SSB 0  
LB 0.30 Hz  
GB 0  
PC 1.00

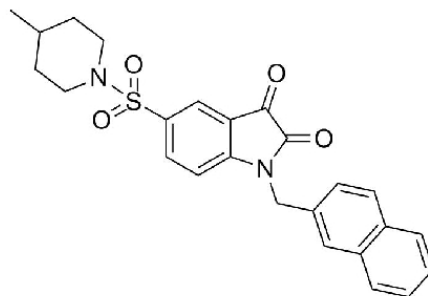

8k3

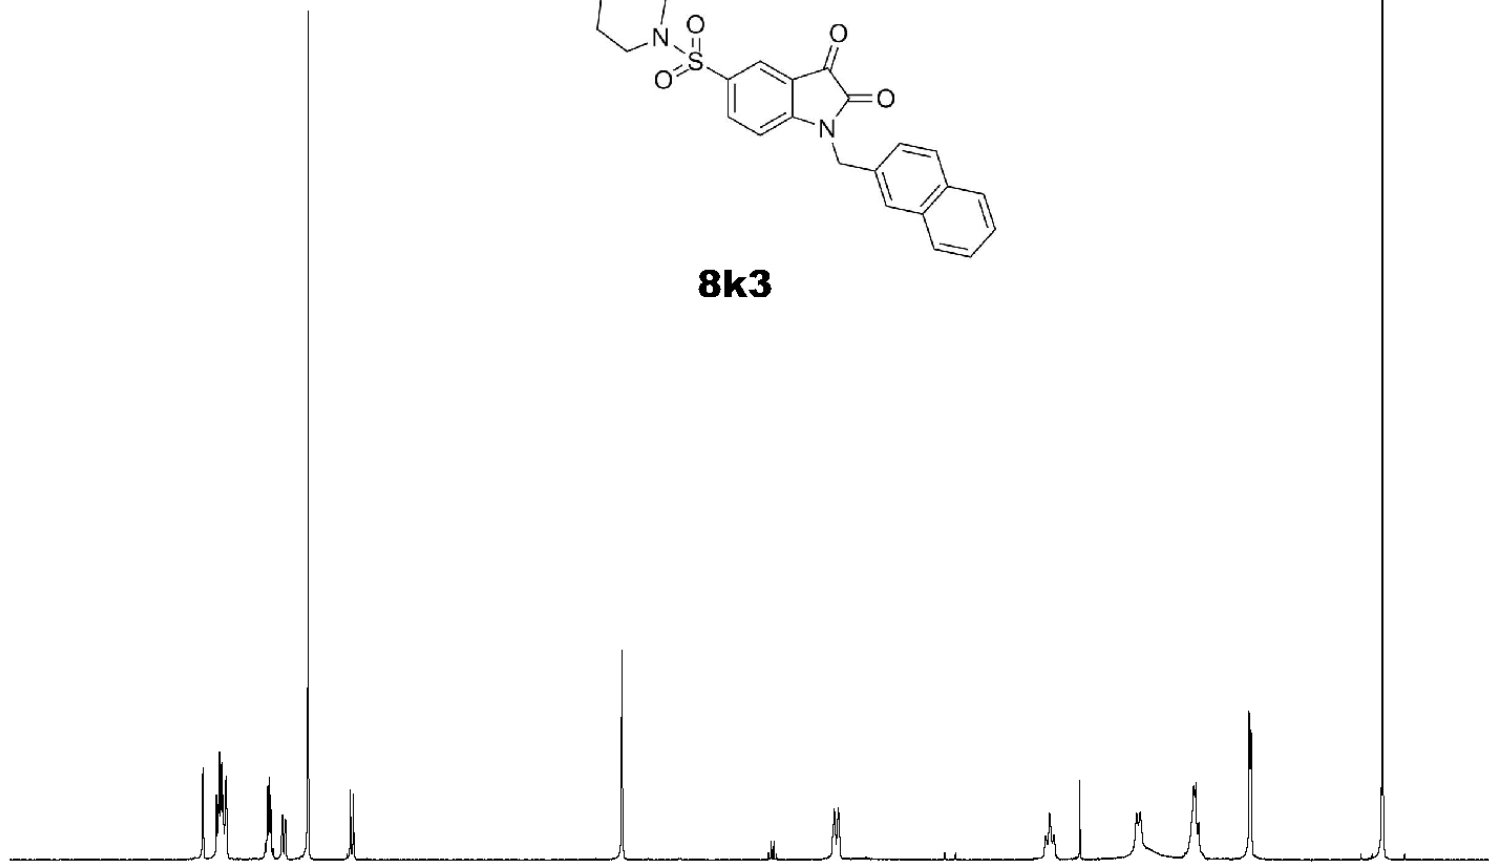

9 8 7 6 5 4 3 2 1 0 ppm

1.00  
4.95  
2.02  
0.99  
0.98  
1.94  
2.10  
2.02  
2.76  
3.71  
3.02

S20120906-096

20120906

PROTON CDCl3 D:\nmr data ham



Current Data Parameters  
NAME ZHM-3.5-ERJIAJIA  
EXPNO 10  
PROCNO 1

F2 - Acquisition Parameters  
Date\_ 20120906  
Time 12.45  
INSTRUM spect  
PROBHD 5 mm PABBO BB-  
PULPROG zg30  
TD 65536  
SOLVENT CDCl3  
NS 16  
DS 2  
SWH 8223.685 Hz  
FIDRES 0.125483 Hz  
AQ 3.9846387 sec  
RG 203  
DW 60.800 usec  
DE 6.50 usec  
TE 298.0 K  
D1 1.00000000 sec

==== CHANNEL f1 =====  
NUC1 1H  
P1 14.50 usec  
PLW1 12.85299969 W  
SFO1 400.1324710 MHz

F2 - Processing parameters  
SI 65536  
SF 400.1300000 MHz  
WDW EM  
SSB 0  
LB 0.30 Hz  
GB 0  
PC 1.00

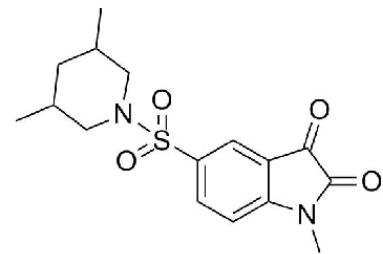

8m1

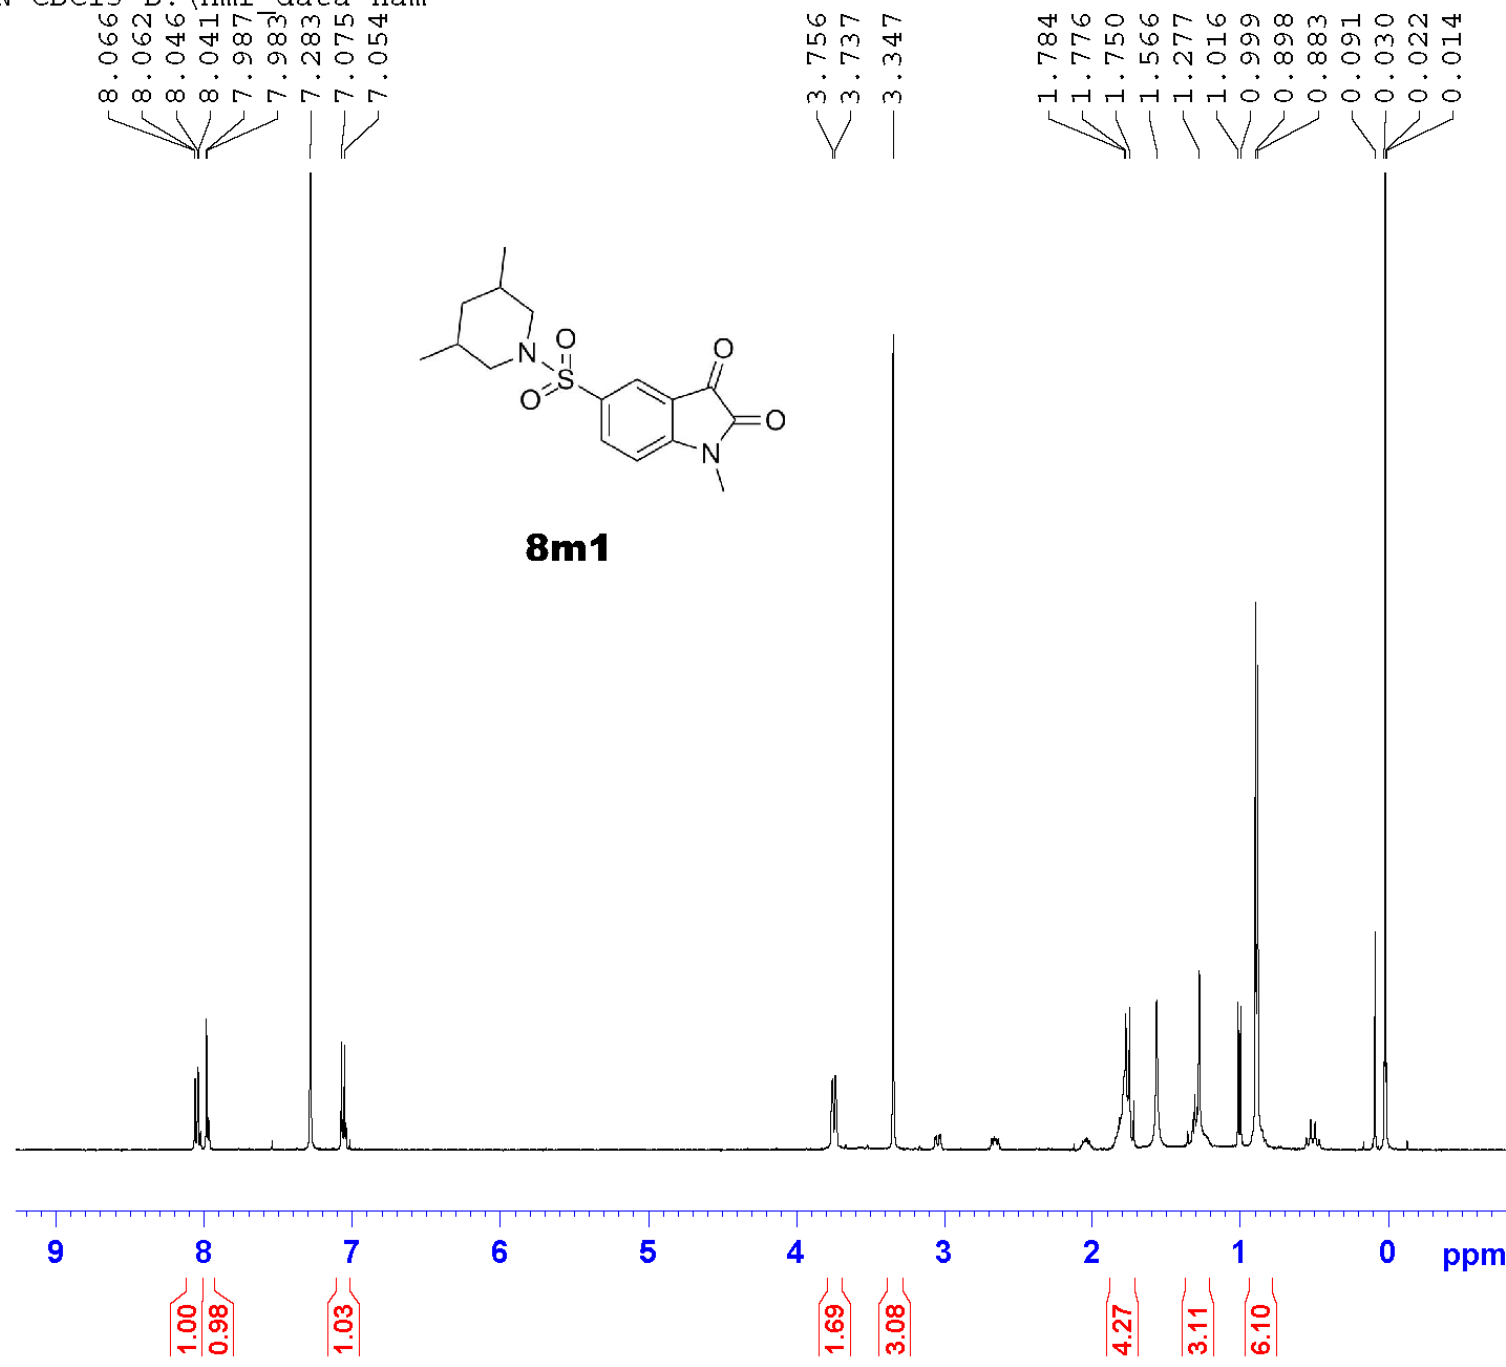

S20120906-090

20120906

PROTON CDC13 D:\nmr data ham

7.991  
7.987  
7.931  
7.927  
7.911  
7.906  
7.412  
7.399  
7.382  
7.373  
7.364  
7.283  
6.963  
6.942  
  
4.998  
  
3.723  
3.705  
  
1.767  
1.741  
1.571  
1.277  
0.883  
0.868  
0.092  
0.031  
0.023  
0.015



Current Data Parameters  
NAME ZHM-3.5-ERJIABIAN  
EXPNO 10  
PROCNO 1

F2 - Acquisition Parameters  
Date\_ 20120906  
Time 12.19  
INSTRUM spect  
PROBHD 5 mm PABBO BB-  
PULPROG zg30  
TD 65536  
SOLVENT CDCl3  
NS 16  
DS 2  
SWH 8223.685 Hz  
FIDRES 0.125483 Hz  
AQ 3.9846387 sec  
RG 203  
DW 60.800 usec  
DE 6.50 usec  
TE 298.0 K  
D1 1.00000000 sec

==== CHANNEL f1 =====  
NUC1 1H  
P1 14.50 usec  
PLW1 12.85299969 W  
SFO1 400.1324710 MHz

F2 - Processing parameters  
SI 65536  
SF 400.1300000 MHz  
WDW EM  
SSB 0  
LB 0.30 Hz  
GB 0  
PC 1.00

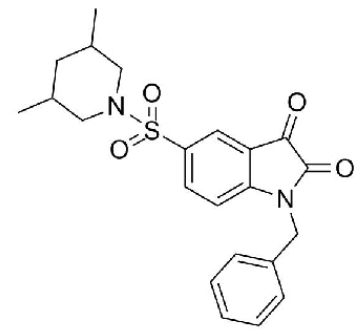

8m2

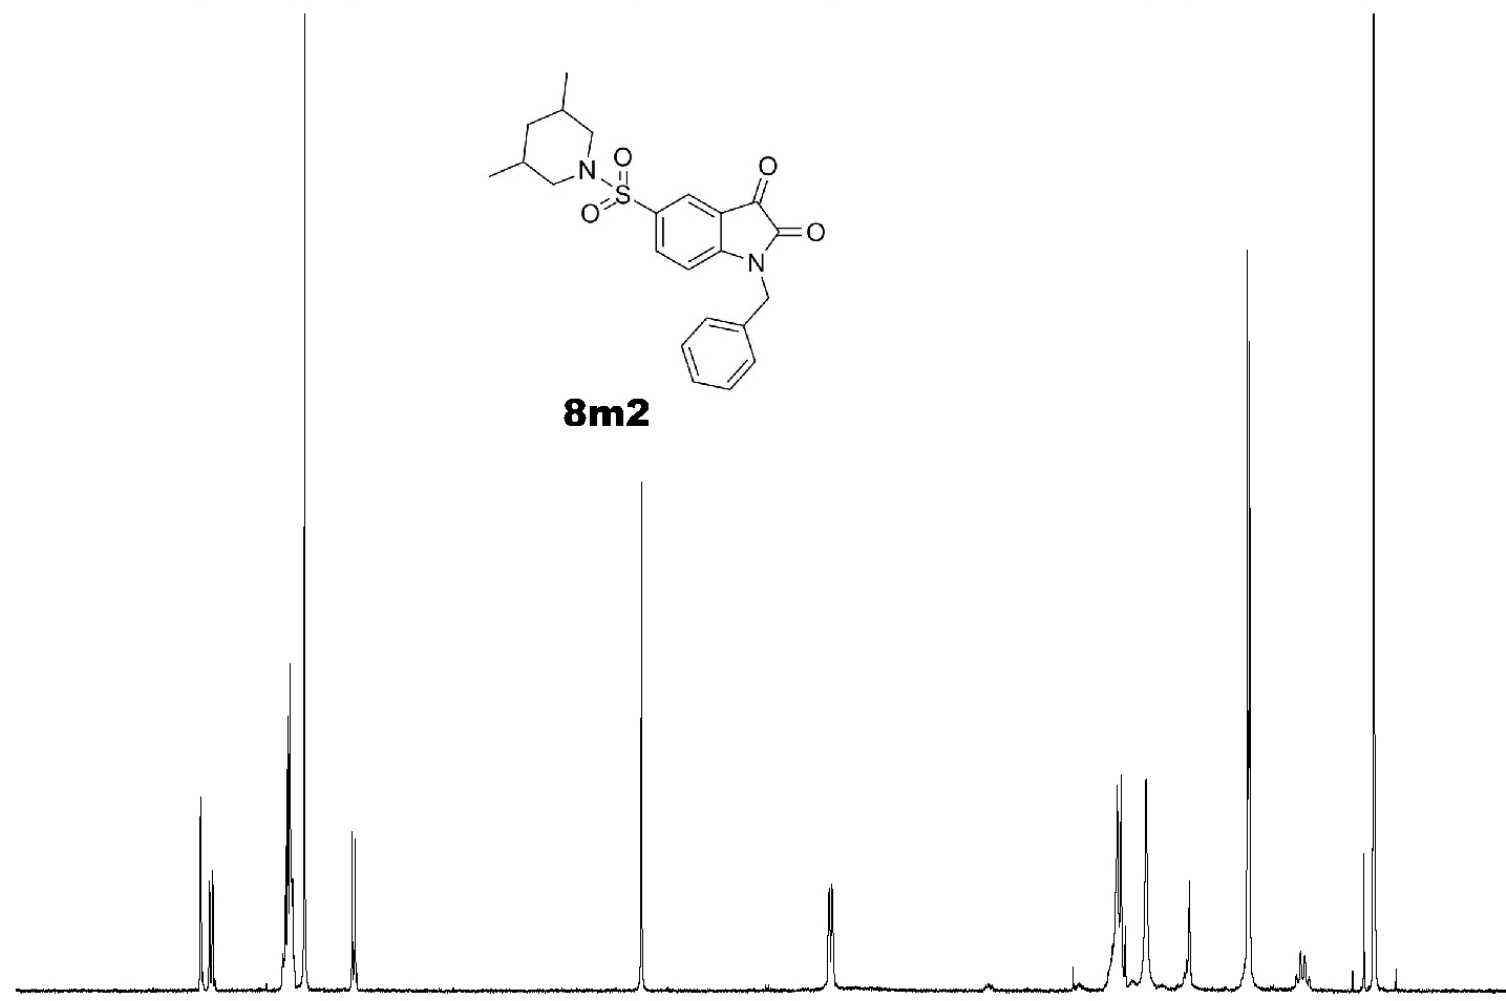

9 8 7 6 5 4 3 2 1 0 ppm

1.00  
1.02  
5.14  
1.03  
2.08  
1.99  
4.78  
6.03

S20121126-011

20121126

PROTON CDC13 D:\nmr data ham

7.894  
7.886  
7.873  
7.869  
7.862  
7.845  
7.560  
7.551  
7.542  
7.469  
7.465  
7.447  
7.444  
7.284  
7.009  
6.988

— 5.163

3.701  
3.682

1.743  
1.717  
1.689  
1.277  
0.981  
0.964  
0.862  
0.847  
0.498  
0.470  
0.024



Current Data Parameters  
NAME ZHM-3.5ERJIANAI  
EXPNO 10  
PROCNO 1

F2 - Acquisition Parameters  
Date\_ 20121126  
Time 11.57  
INSTRUM spect  
PROBHD 5 mm PABBO BB-  
PULPROG zg30  
TD 65536  
SOLVENT CDCl3  
NS 16  
DS 2  
SWH 8223.685 Hz  
FIDRES 0.125483 Hz  
AQ 3.9846387 sec  
RG 203  
DW 60.800 usec  
DE 6.50 usec  
TE 298.0 K  
D1 1.0000000 sec

==== CHANNEL f1 =====  
NUC1 1H  
P1 14.50 usec  
PLW1 12.85299969 W  
SFO1 400.1324710 MHz

F2 - Processing parameters  
SI 65536  
SF 400.1300000 MHz  
WDW EM  
SSB 0  
LB 0.30 Hz  
GB 0  
PC 1.00

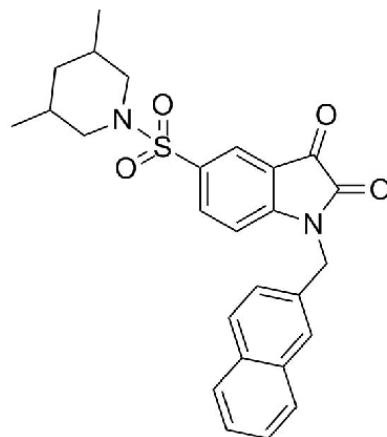

8m3

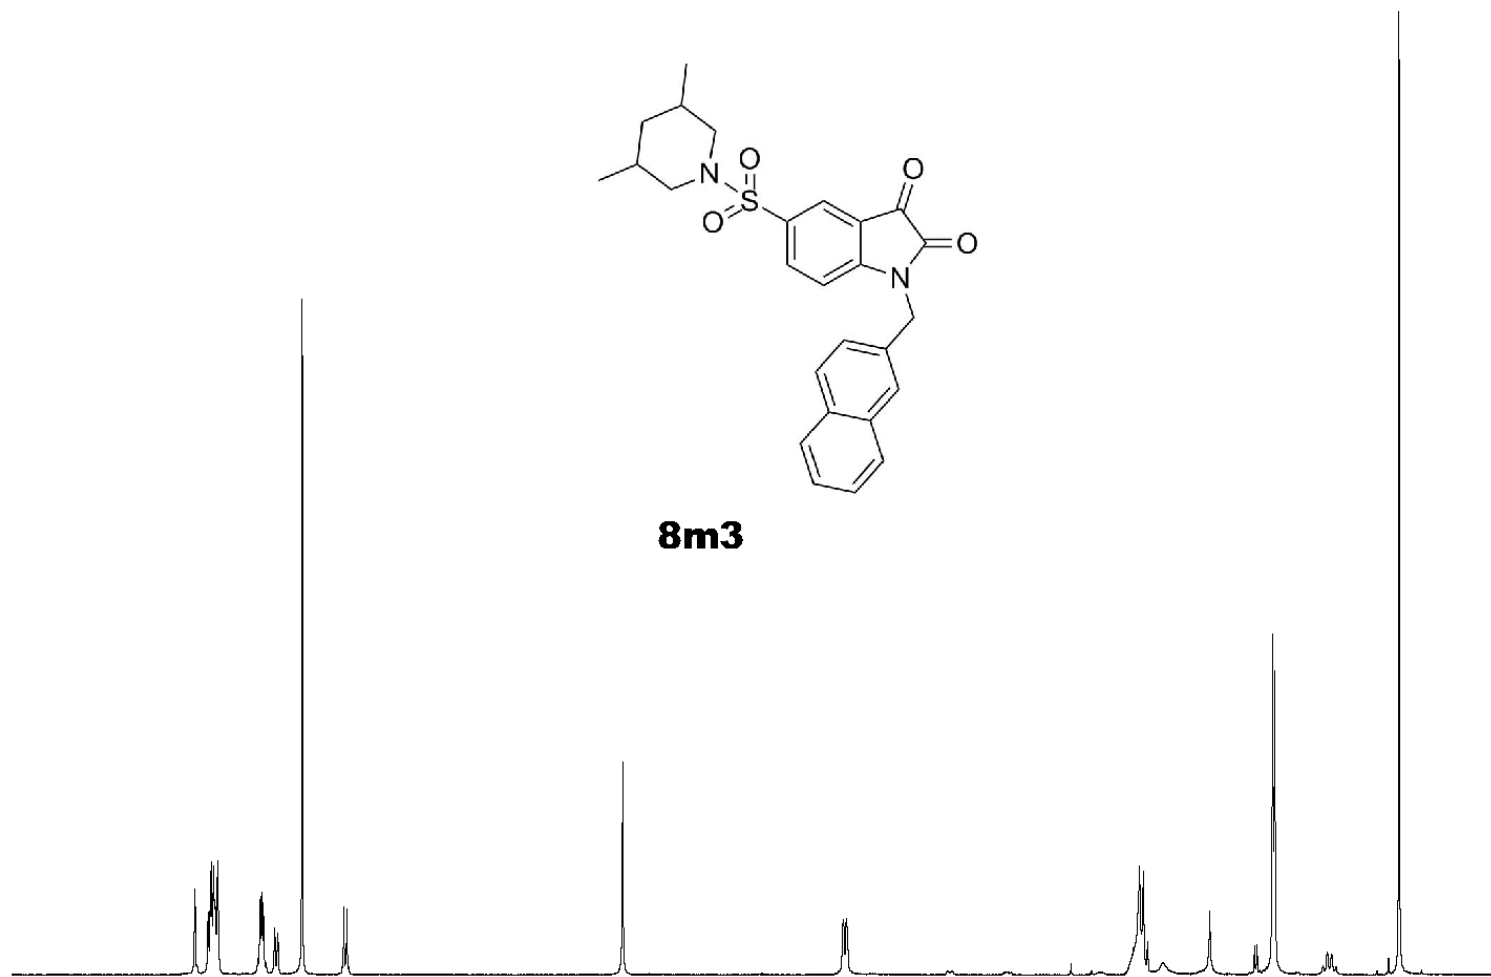

9 8 7 6 5 4 3 2 1 0 ppm

1.02  
4.87  
1.96  
1.00  
1.00

1.94

1.87

4.57

5.62

S20121115-042

20121115

C13CPD DMSO D:\nmr\_data ham

— 183.33  
— 159.93  
— 154.34  
— 137.48  
— 129.17  
— 123.85  
— 118.68  
— 113.24

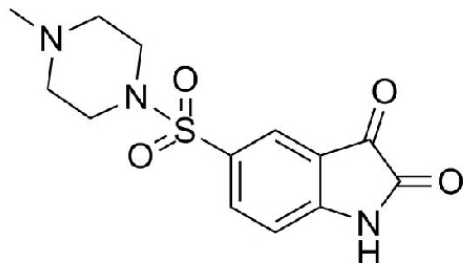

7a

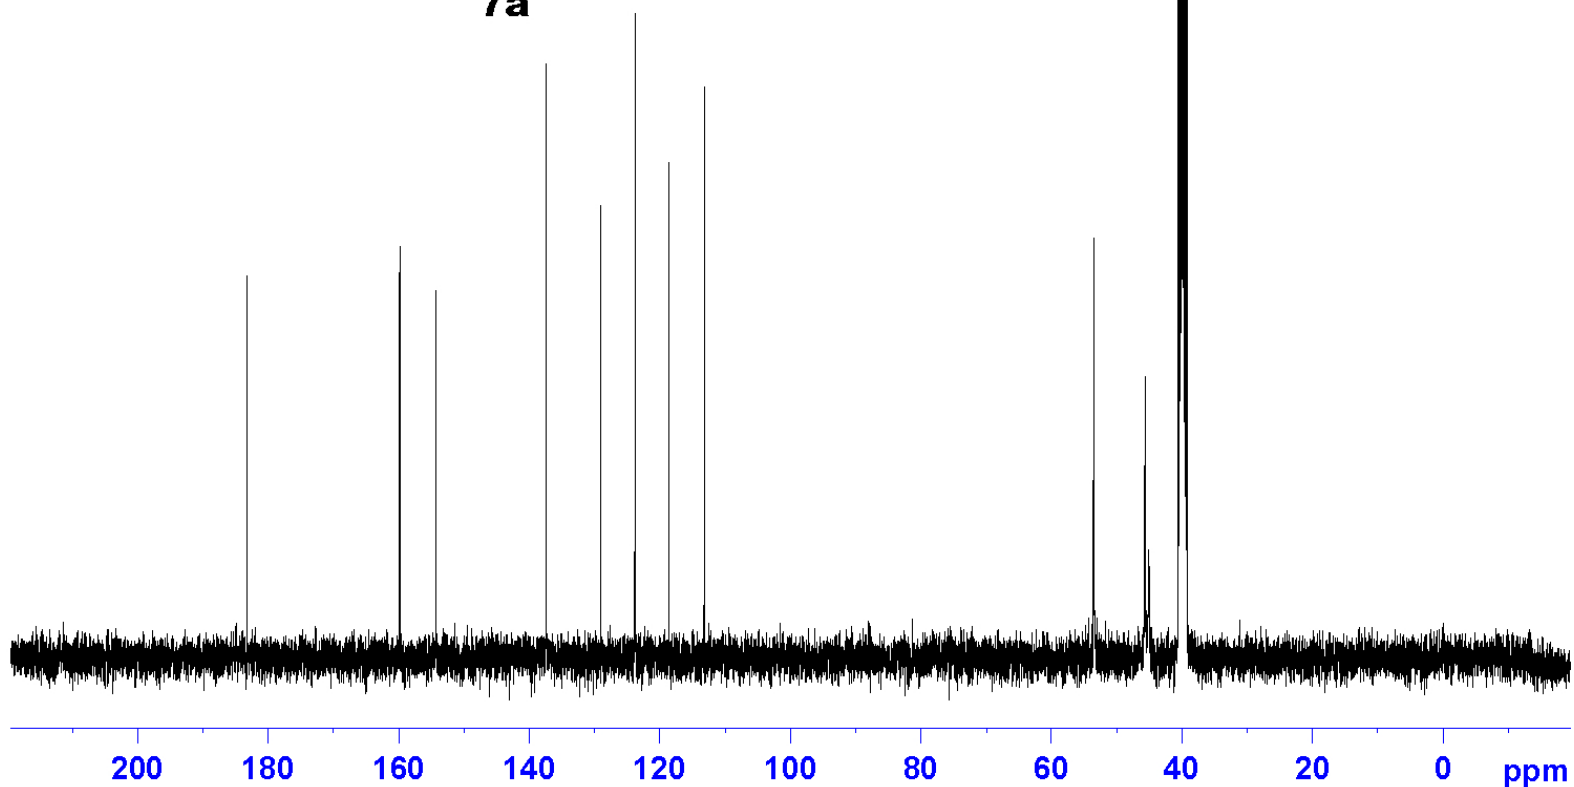

53.59  
45.75  
45.16  
40.61  
40.40  
40.20  
39.99  
39.78  
39.57  
39.36

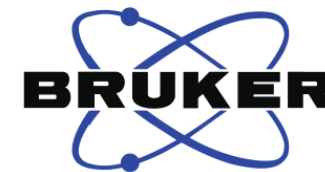

Current Data Parameters  
NAME ZHM-NJIAPAI  
EXPNO 10  
PROCNO 1

F2 - Acquisition Parameters  
Date\_ 20121115  
Time 17.25  
INSTRUM spect  
PROBHD 5 mm PABBO BB-  
PULPROG zgpg30  
TD 65536  
SOLVENT DMSO  
NS 1024  
DS 4  
SWH 24038.461 Hz  
FIDRES 0.366798 Hz  
AQ 1.3631988 sec  
RG 203  
DW 20.800 usec  
DE 6.50 usec  
TE 298.1 K  
D1 2.00000000 sec  
D11 0.03000000 sec

==== CHANNEL f1 =====  
NUC1 13C  
P1 9.65 usec  
PLW1 49.65900040 W  
SFO1 100.6228293 MHz

==== CHANNEL f2 =====  
CPDPRG2 waltz16  
NUC2 1H  
PCPD2 90.00 usec  
PLW2 12.85299969 W  
PLW12 0.34196001 W  
PLW13 0.27699000 W  
SFO2 400.1316005 MHz

F2 - Processing parameters  
SI 32768  
SF 100.6127690 MHz  
WDW EM  
SSB 0  
LB 1.00 Hz  
GB 0  
PC 1.40

S20130122-017  
13C DMSO  
20130129

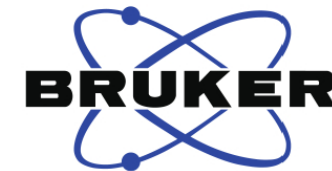

183.33  
159.96  
157.72  
156.15  
154.38  
147.73  
137.57  
128.86  
123.89  
118.79  
118.64  
118.58  
118.53  
115.92  
115.78  
113.27

49.24  
49.14  
46.34  
40.53  
40.41  
40.27  
40.13  
39.99  
39.85  
39.72  
39.58

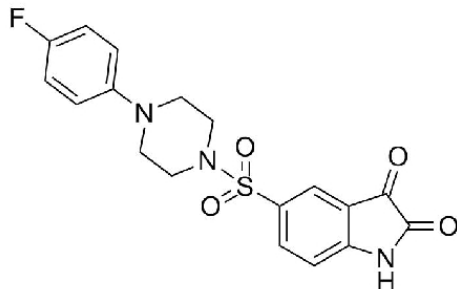

7b

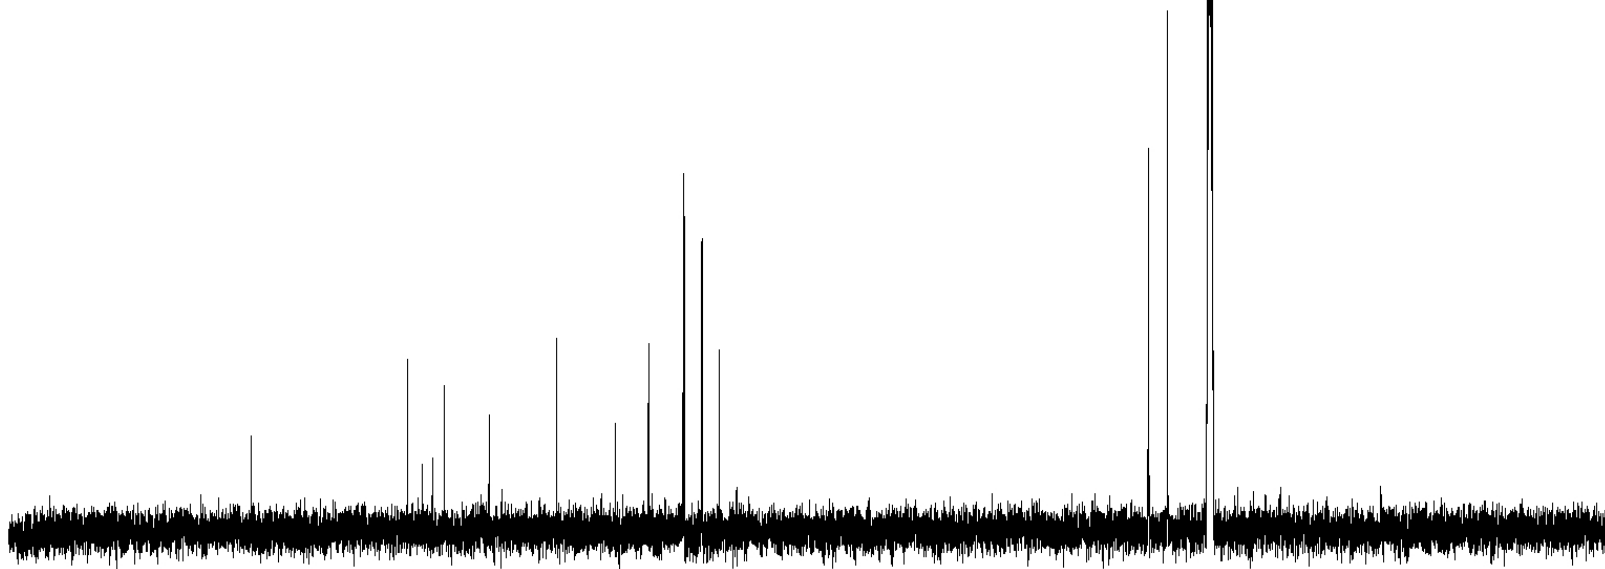

Current Data Parameters  
NAME ZHM-4FBen  
EXPNO 10  
PROCNO 1

F2 - Acquisition Parameters  
Date\_ 20130129  
Time 12.39  
INSTRUM spect  
PROBHD 5 mm PABBO BB-  
PULPROG zgpg30  
TD 65536  
SOLVENT DMSO  
NS 1024  
DS 4  
SWH 36057.691 Hz  
FIDRES 0.550197 Hz  
AQ 0.9088159 sec  
RG 203  
DW 13.867 usec  
DE 6.50 usec  
TE 296.6 K  
D1 2.0000000 sec  
D11 0.0300000 sec

==== CHANNEL f1 =====  
NUC1 13C  
P1 15.08 usec  
PLW1 100.0000000 W  
SFO1 150.9430456 MHz

==== CHANNEL f2 =====  
CPDPRG2 waltz16  
NUC2 1H  
PCPD2 70.00 usec  
PLW2 17.78300095 W  
PLW12 0.65262997 W  
PLW13 0.65262997 W  
SFO2 600.2324009 MHz

F2 - Processing parameters  
SI 32768  
SF 150.9279540 MHz  
WDW EM  
SSB 0  
LB 1.00 Hz  
GB 0  
PC 1.40

200 180 160 140 120 100 80 60 40 20 0 ppm

S20130408-007

20130410

C13CPD DMSO D:\nmr\_data ham

183.31  
159.92  
154.38  
151.04  
137.56  
130.84  
130.52  
130.22  
129.91  
128.91  
126.13  
123.88  
123.42  
120.71  
119.88  
118.76  
115.89  
115.85  
113.27  
112.17  
112.13

60.21  
47.70  
46.13  
40.61  
40.40  
40.19  
39.99  
39.78  
39.57  
39.36  
21.21  
14.54

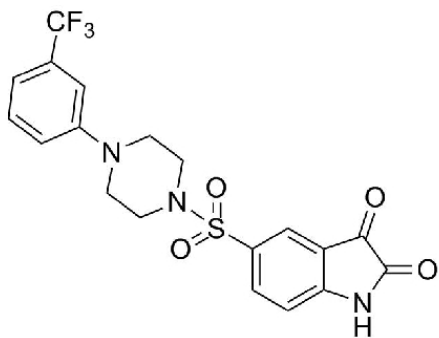

7c

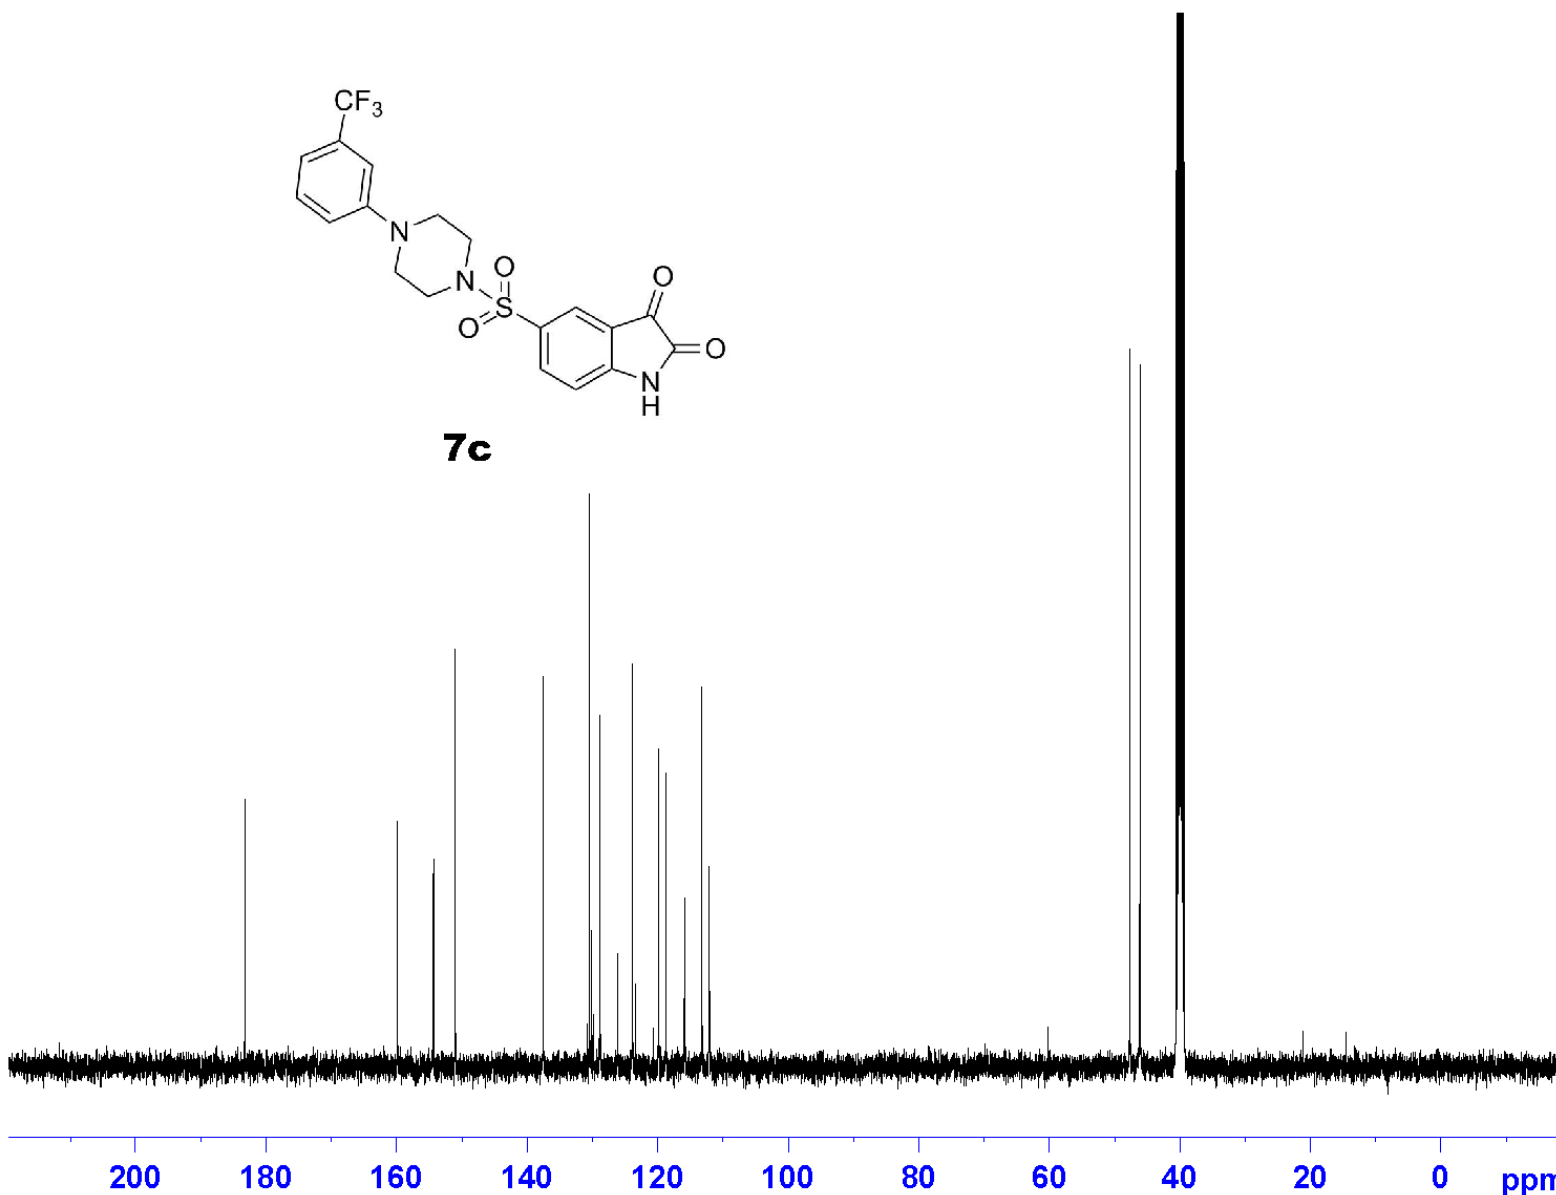

Current Data Parameters  
NAME ZHM-3F  
EXPNO 10  
PROCNO 1

F2 - Acquisition Parameters  
Date\_ 20130410  
Time 18.58  
INSTRUM spect  
PROBHD 5 mm PABBO BB-  
PULPROG zgpg30  
TD 65536  
SOLVENT DMSO  
NS 1024  
DS 4  
SWH 24038.461 Hz  
FIDRES 0.366798 Hz  
AQ 1.3631988 sec  
RG 203  
DW 20.800 usec  
DE 6.50 usec  
TE 298.6 K  
D1 2.00000000 sec  
D11 0.03000000 sec

==== CHANNEL f1 =====  
NUC1 13C  
P1 9.65 usec  
PLW1 49.65900040 W  
SFO1 100.6228293 MHz

==== CHANNEL f2 =====  
CPDPRG2 waltz16  
NUC2 1H  
PCPD2 90.00 usec  
PLW2 12.85299969 W  
PLW12 0.34196001 W  
PLW13 0.27699000 W  
SFO2 400.1316005 MHz

F2 - Processing parameters  
SI 32768  
SF 100.6127690 MHz  
WDW EM  
SSB 0  
LB 1.00 Hz  
GB 0  
PC 1.40



S20130114-016

20130114

C13CPD DMSO D:\nmr\_data ham

183.33

159.95

154.29

137.50

135.60

133.74

131.23

130.77

129.74

129.21

128.94

128.85

127.46

123.86

118.73

113.22

58.48

51.93

46.48

40.62

40.41

40.21

40.00

39.79

39.58

39.37

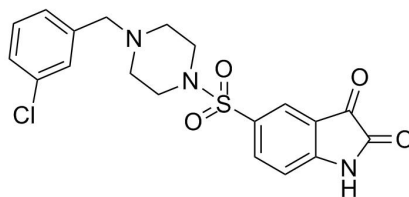

7d

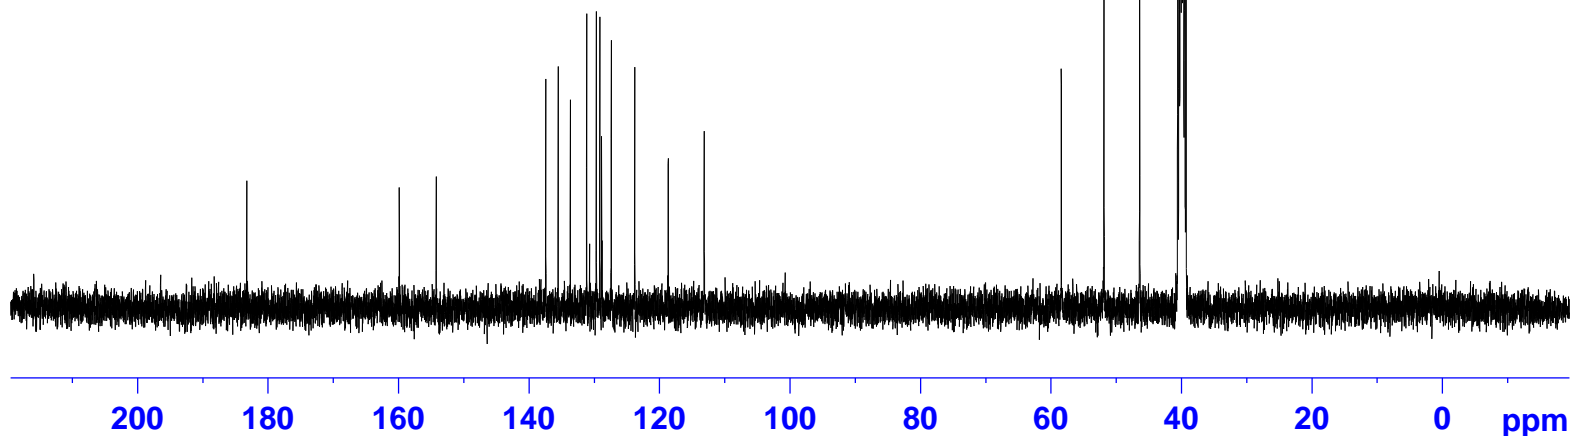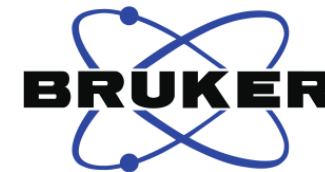

Current Data Parameters  
NAME ZHM-3CLBIAN  
EXPNO 10  
PROCNO 1

F2 - Acquisition Parameters  
Date\_ 20130114  
Time 20.23  
INSTRUM spect  
PROBHD 5 mm PABBO BB-  
PULPROG zgpg30  
TD 65536  
SOLVENT DMSO  
NS 1024  
DS 4  
SWH 24038.461 Hz  
FIDRES 0.366798 Hz  
AQ 1.3631988 sec  
RG 203  
DW 20.800 usec  
DE 6.50 usec  
TE 299.0 K  
D1 2.0000000 sec  
D11 0.0300000 sec

==== CHANNEL f1 =====  
NUC1 13C  
P1 9.65 usec  
PLW1 49.65900040 W  
SFO1 100.6228293 MHz

==== CHANNEL f2 =====  
CPDPRG2 waltz16  
NUC2 1H  
PCPD2 90.00 usec  
PLW2 12.85299969 W  
PLW12 0.34196001 W  
PLW13 0.27699000 W  
SFO2 400.1316005 MHz

F2 - Processing parameters  
SI 32768  
SF 100.6127690 MHz  
WDW EM  
SSB 0  
LB 1.00 Hz  
GB 0  
PC 1.40

S20120309-007  
13C DMSO  
20120309

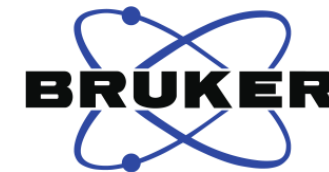

— 183.36  
— 159.94  
— 154.27  
— 153.05  
— 152.40  
— 142.28  
— 137.48  
— 129.26  
— 125.05  
— 123.83  
— 123.59  
— 118.70  
— 113.22  
— 108.08

61.35  
60.74  
56.28  
55.67  
51.88  
46.50  
40.59  
40.47  
40.33  
40.19  
40.05  
39.91  
39.78  
39.64

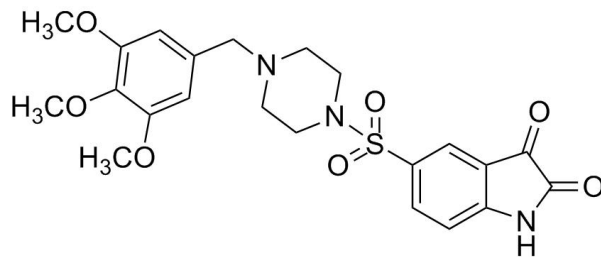

7e

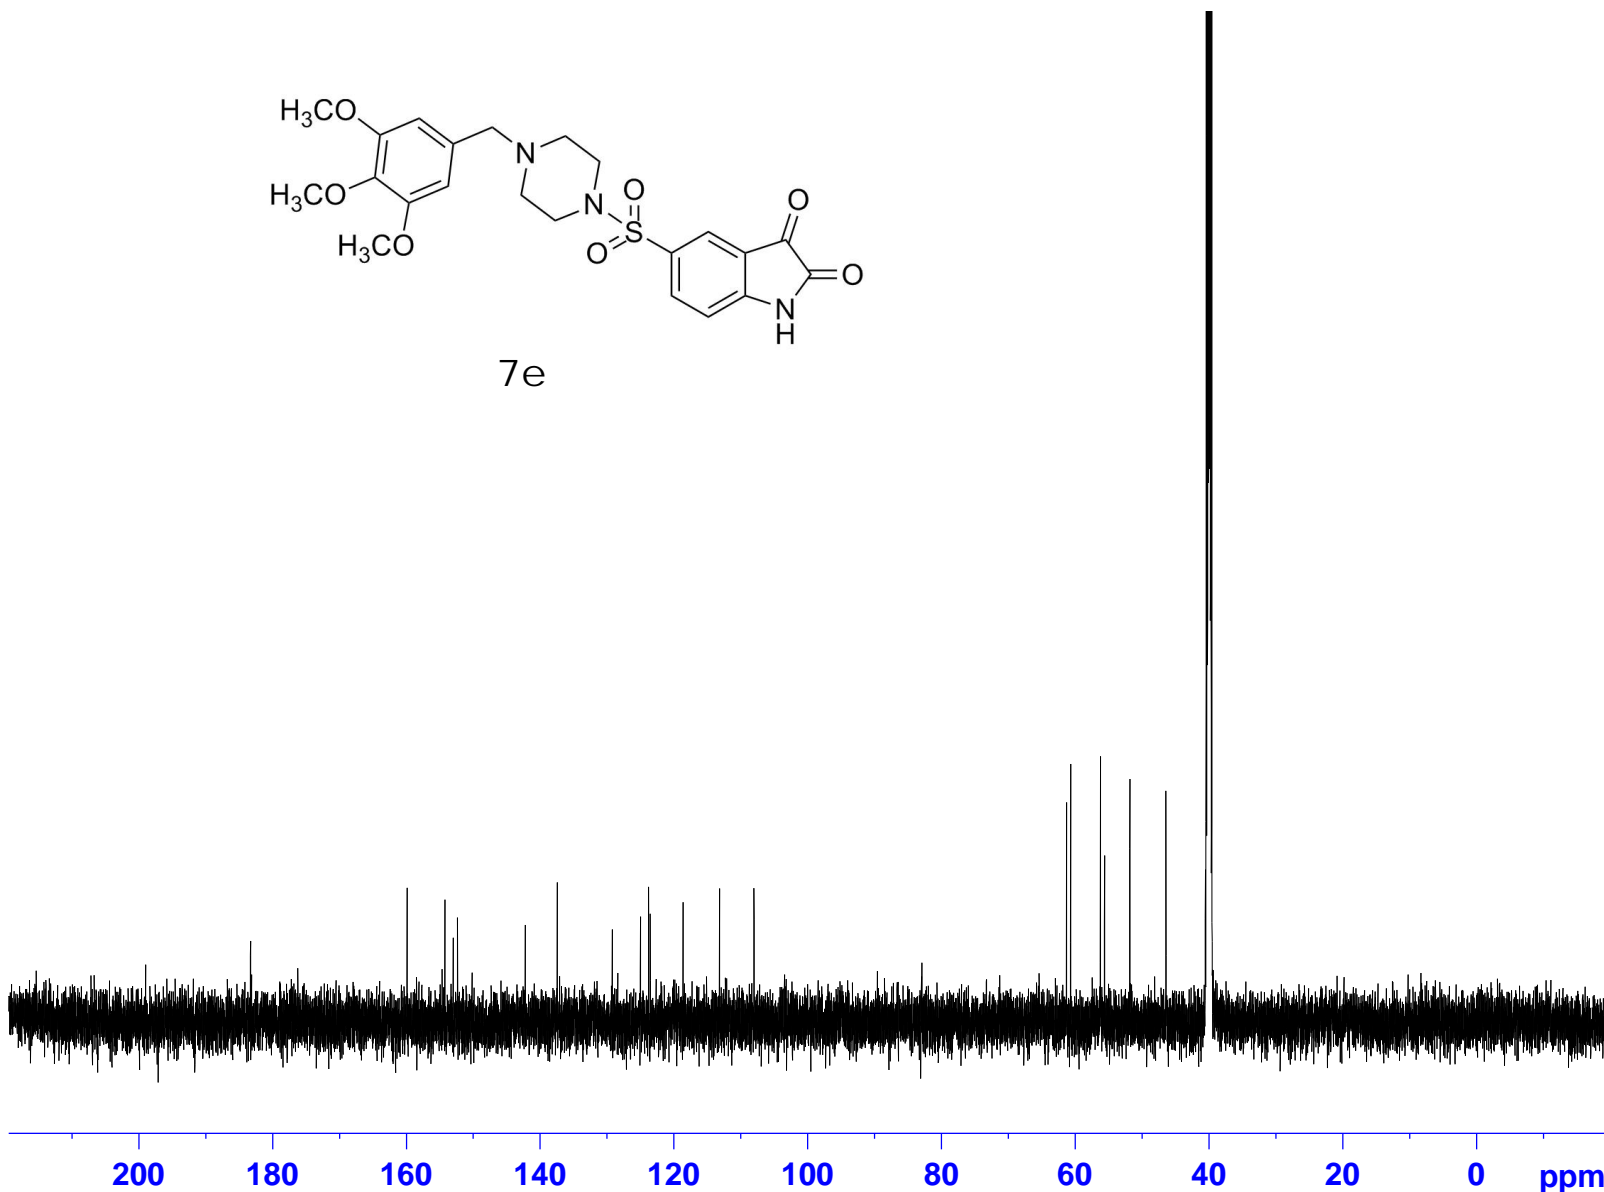

Current Data Parameters  
NAME ZHM-3DCH3  
EXPNO 2  
PROCNO 1

F2 - Acquisition Parameters  
Date\_ 20120309  
Time 11.05  
INSTRUM spect  
PROBHD 5 mm PABBO BB-  
PULPROG zgpg30  
TD 65536  
SOLVENT DMSO  
NS 1024  
DS 4  
SWH 36057.691 Hz  
FIDRES 0.550197 Hz  
AQ 0.9088159 sec  
RG 203  
DW 13.867 usec  
DE 6.50 usec  
TE 303.0 K  
D1 2.0000000 sec  
D11 0.0300000 sec

==== CHANNEL f1 =====  
NUC1 13C  
P1 14.68 usec  
PLW1 100.0000000 W  
SFO1 150.9430456 MHz

==== CHANNEL f2 =====  
CPDPRG2 waltz16  
NUC2 1H  
PCPD2 70.00 usec  
PLW2 17.78300095 W  
PLW12 0.64582998 W  
PLW13 0.64582998 W  
SFO2 600.2324009 MHz

F2 - Processing parameters  
SI 32768  
SF 150.9279540 MHz  
WDW EM  
SSB 0  
LB 1.00 Hz  
GB 0  
PC 1.40

S20120319-004

20120319

C13CPD Acetone D:\nmr\_data ham

— 182.89  
— 159.50  
— 153.83  
— 140.14  
— 137.04  
— 128.56  
— 128.53  
— 128.22  
— 125.86  
— 123.38  
— 118.27  
— 112.74

58.88  
51.47  
45.92  
40.17  
39.96  
39.75  
39.54  
39.33  
39.13  
38.92  
32.49

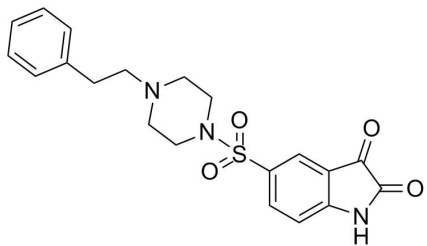

7f

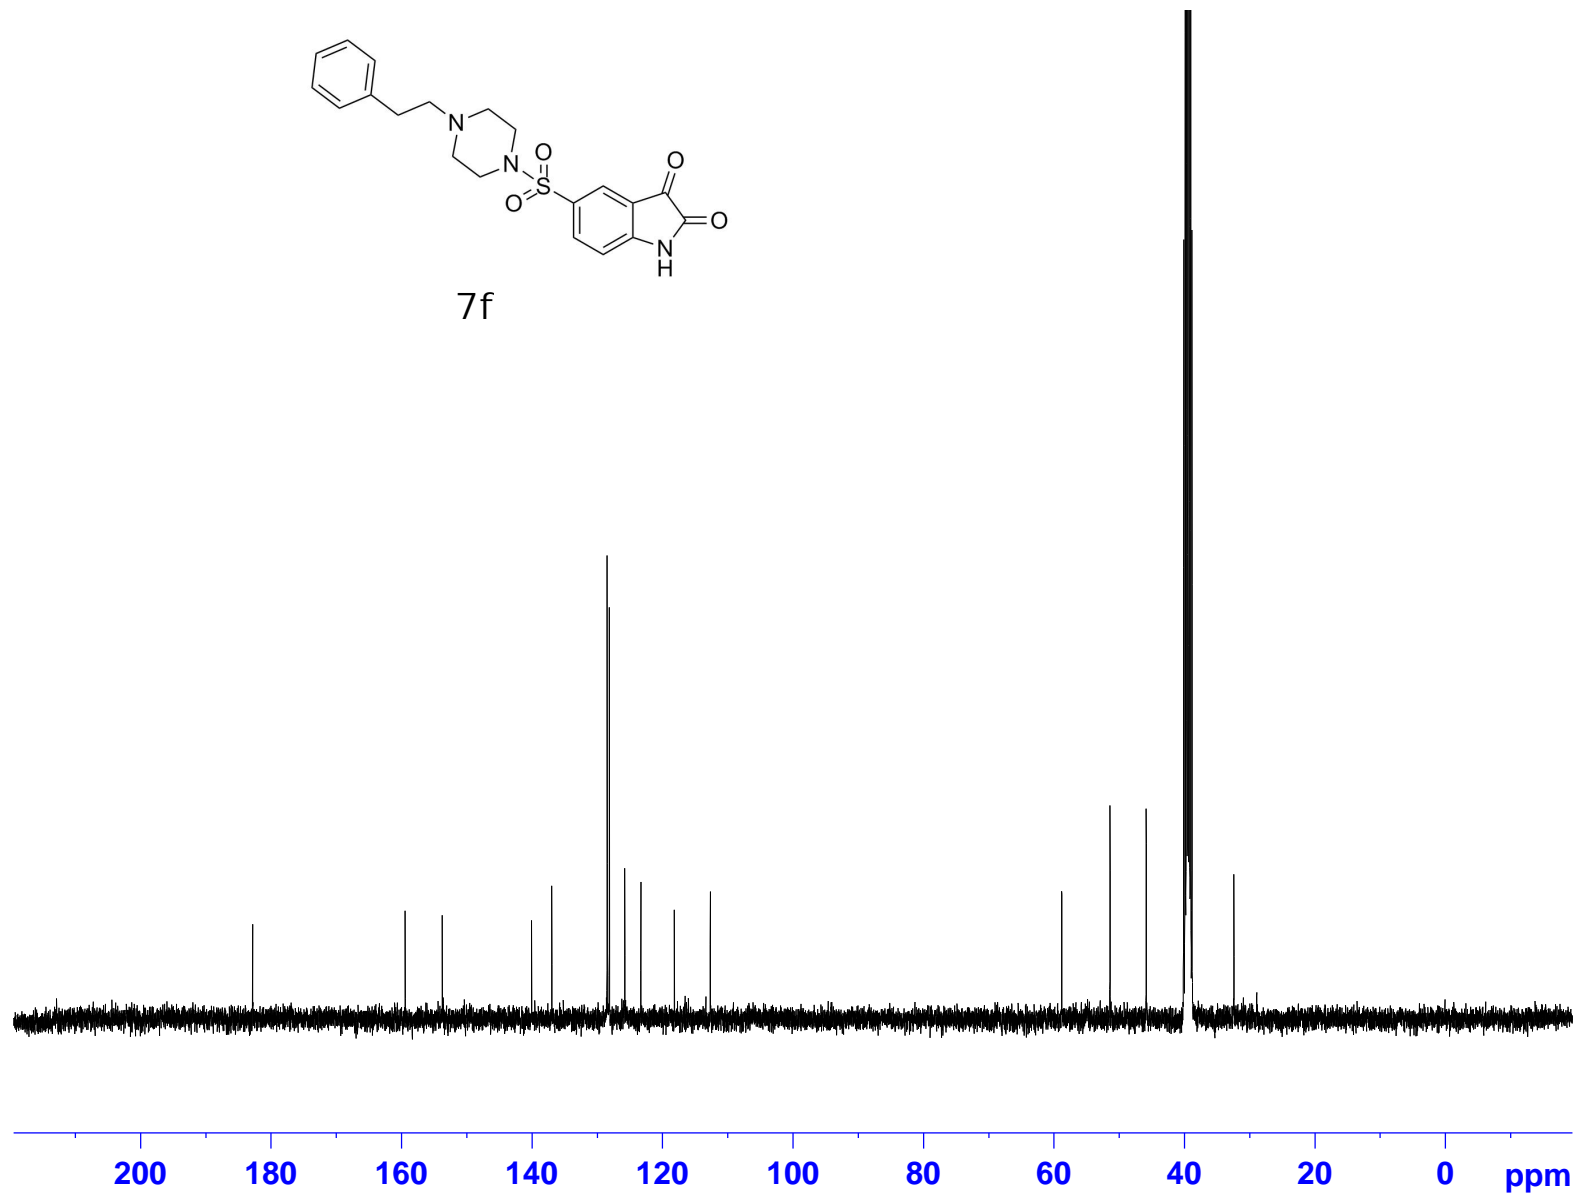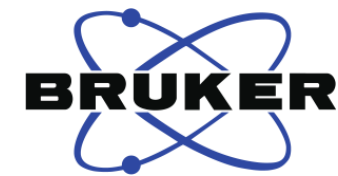

Current Data Parameters  
NAME ZHM-YIBEN  
EXPNO 10  
PROCNO 1

F2 - Acquisition Parameters  
Date\_ 20120320  
Time 3.26  
INSTRUM spect  
PROBHD 5 mm PABBO BB-  
PULPROG zgpg30  
TD 65536  
SOLVENT Acetone  
NS 1024  
DS 4  
SWH 24038.461 Hz  
FIDRES 0.366798 Hz  
AQ 1.3631988 sec  
RG 203  
DW 20.800 usec  
DE 6.50 usec  
TE 298.0 K  
D1 2.00000000 sec  
D11 0.03000000 sec

==== CHANNEL f1 =====  
NUC1 13C  
P1 9.65 usec  
PLW1 49.65900040 W  
SFO1 100.6228293 MHz

==== CHANNEL f2 =====  
CPDPRG2 waltz16  
NUC2 1H  
PCPD2 90.00 usec  
PLW2 12.85299969 W  
PLW12 0.34196001 W  
PLW13 0.27699000 W  
SFO2 400.1316005 MHz

F2 - Processing parameters  
SI 32768  
SF 100.6127690 MHz  
WDW EM  
SSB 0  
LB 1.00 Hz  
GB 0  
PC 1.40

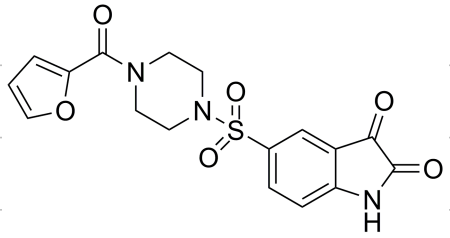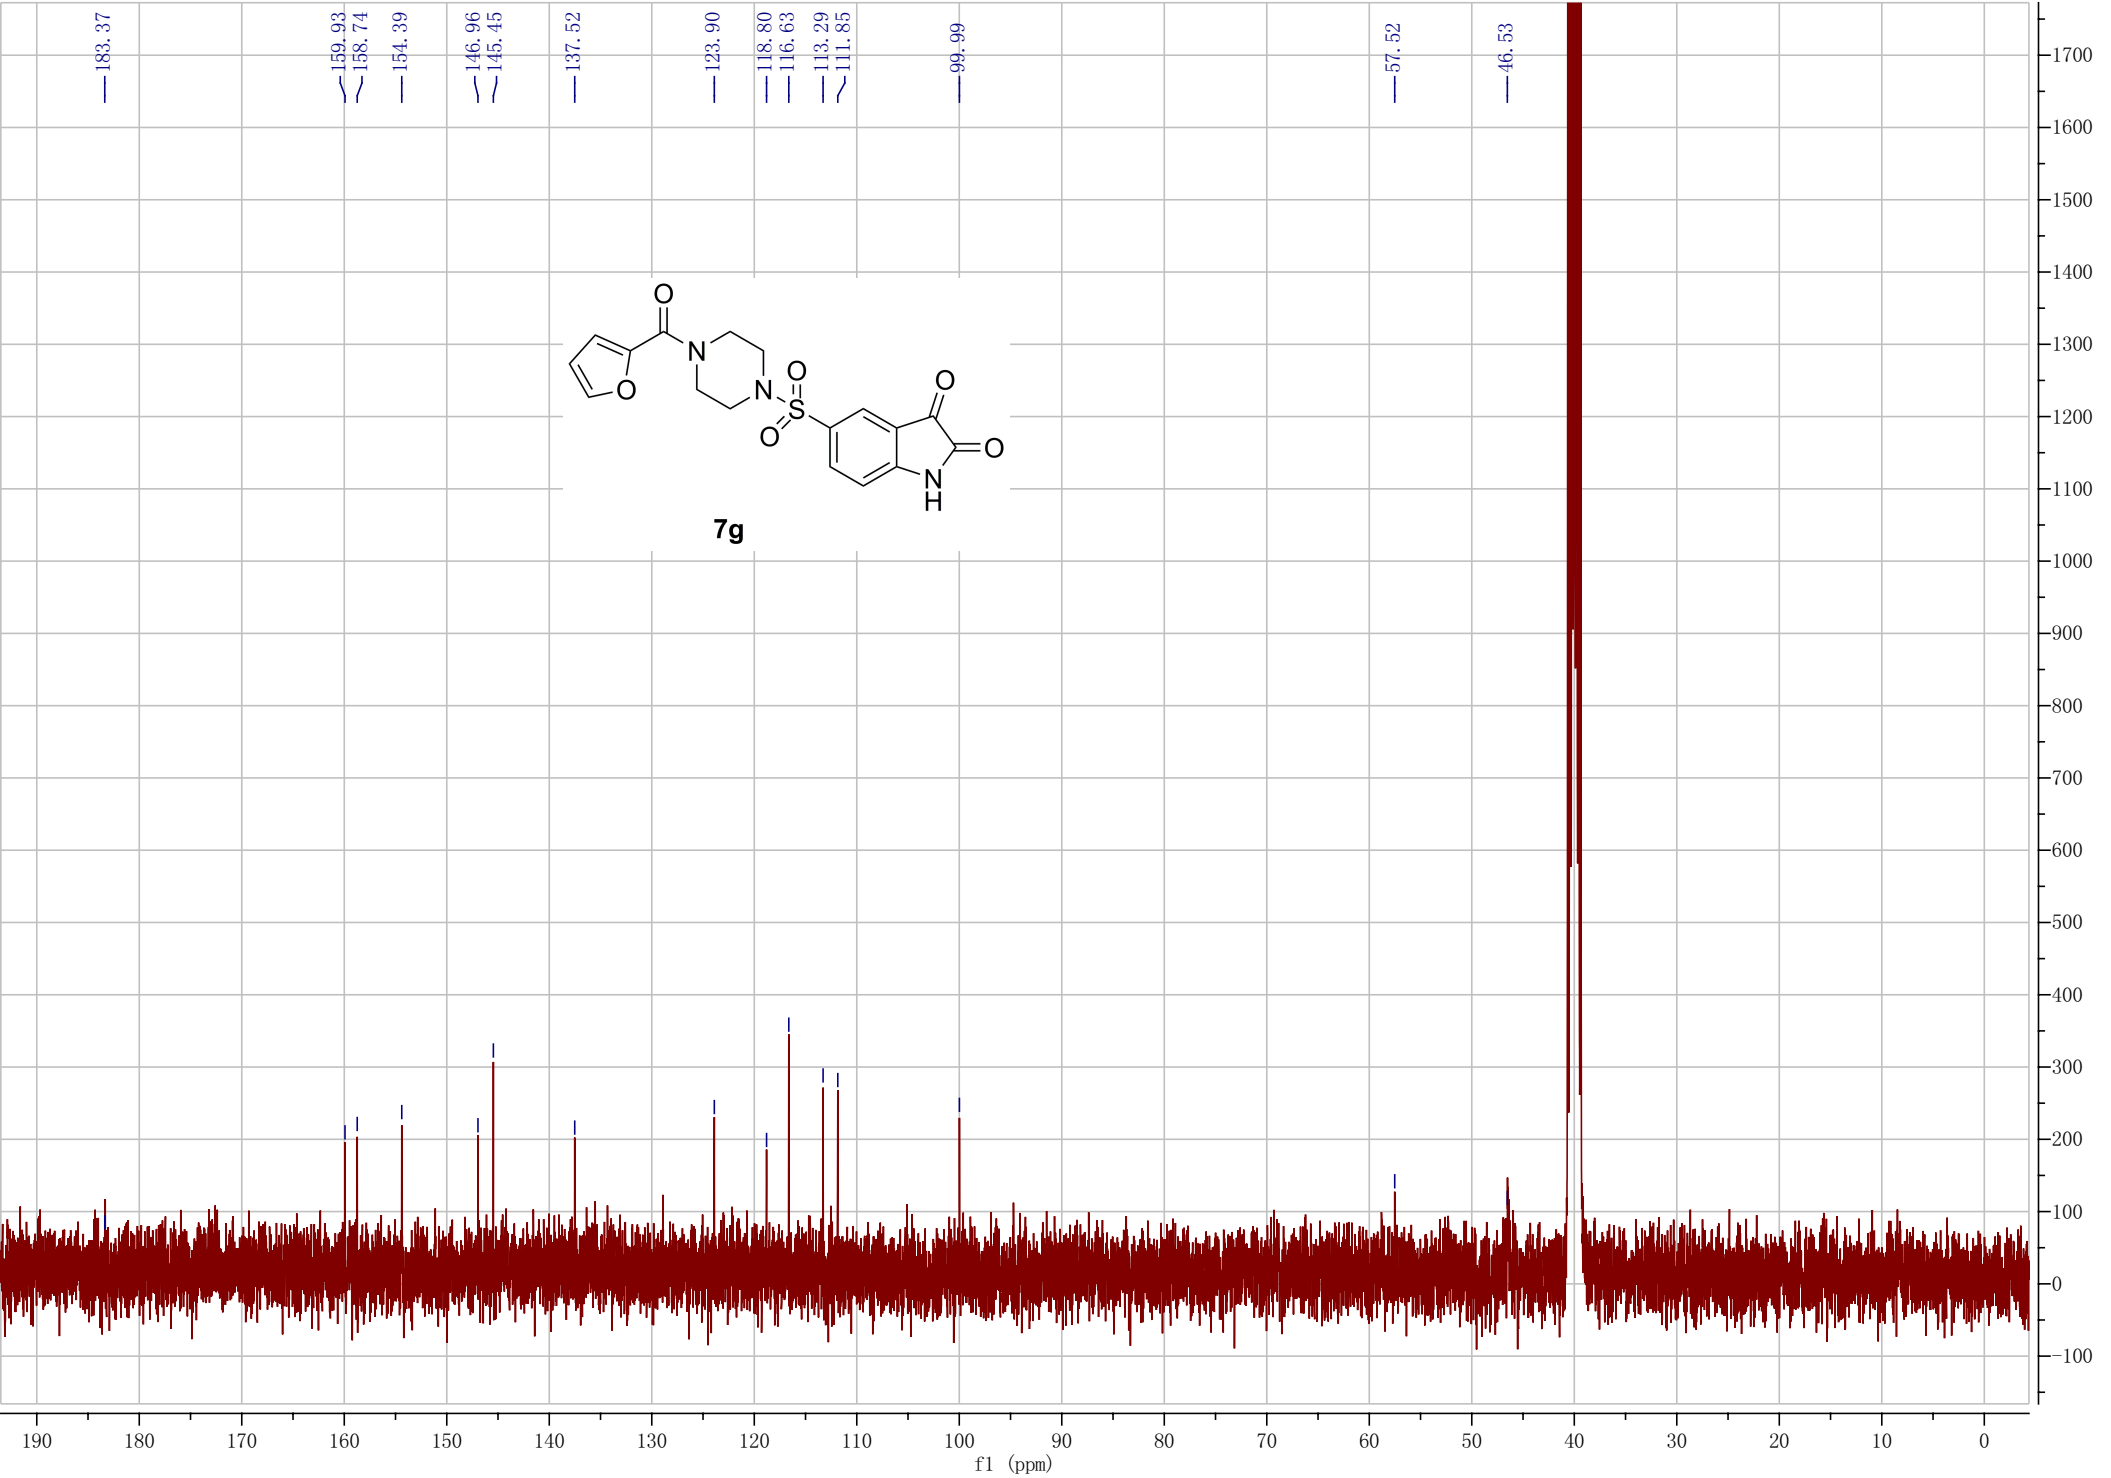

S20130107-064

20130108

C13CPD DMSO D:\nmr\_data ham

183.31

159.91

158.66

154.33

147.98

138.19

137.50

129.07

123.86

118.75

113.98

113.24

107.89

46.01

44.39

40.64

40.43

40.22

40.01

39.80

39.60

39.39

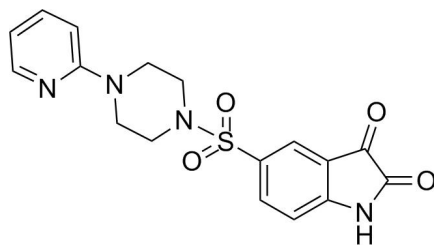

7h

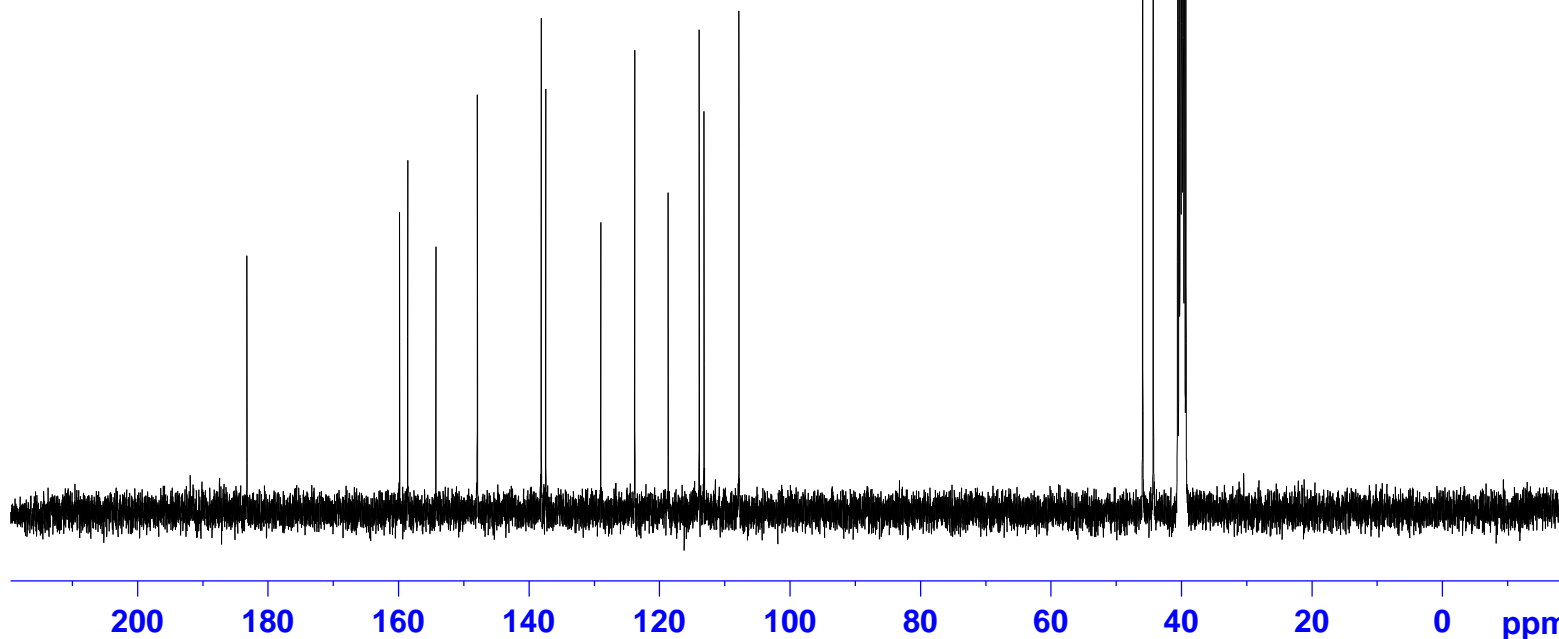

Current Data Parameters  
NAME ZHM-2BI  
EXPNO 10  
PROCNO 1

F2 - Acquisition Parameters  
Date\_ 20130108  
Time 20.02  
INSTRUM spect  
PROBHD 5 mm PABBO BB-  
PULPROG zgpg30  
TD 65536  
SOLVENT DMSO  
NS 1024  
DS 4  
SWH 24038.461 Hz  
FIDRES 0.366798 Hz  
AQ 1.3631988 sec  
RG 203  
DW 20.800 usec  
DE 6.50 usec  
TE 304.1 K  
D1 2.0000000 sec  
D11 0.0300000 sec

==== CHANNEL f1 =====  
NUC1 13C  
P1 9.65 usec  
PLW1 49.65900040 W  
SFO1 100.6228293 MHz

==== CHANNEL f2 =====  
CPDPRG2 waltz16  
NUC2 1H  
PCPD2 90.00 usec  
PLW2 12.85299969 W  
PLW12 0.34196001 W  
PLW13 0.27699000 W  
SFO2 400.1316005 MHz

F2 - Processing parameters  
SI 32768  
SF 100.6127690 MHz  
WDW EM  
SSB 0  
LB 1.00 Hz  
GB 0  
PC 1.40

S20121204-018

20121204

C13CPD DMSO D:\nmr\_data ham

— 183.43  
— 159.92  
— 154.11  
— 137.41  
— 129.94  
— 123.67  
— 118.60  
— 113.18

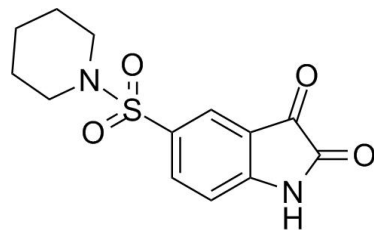

7i

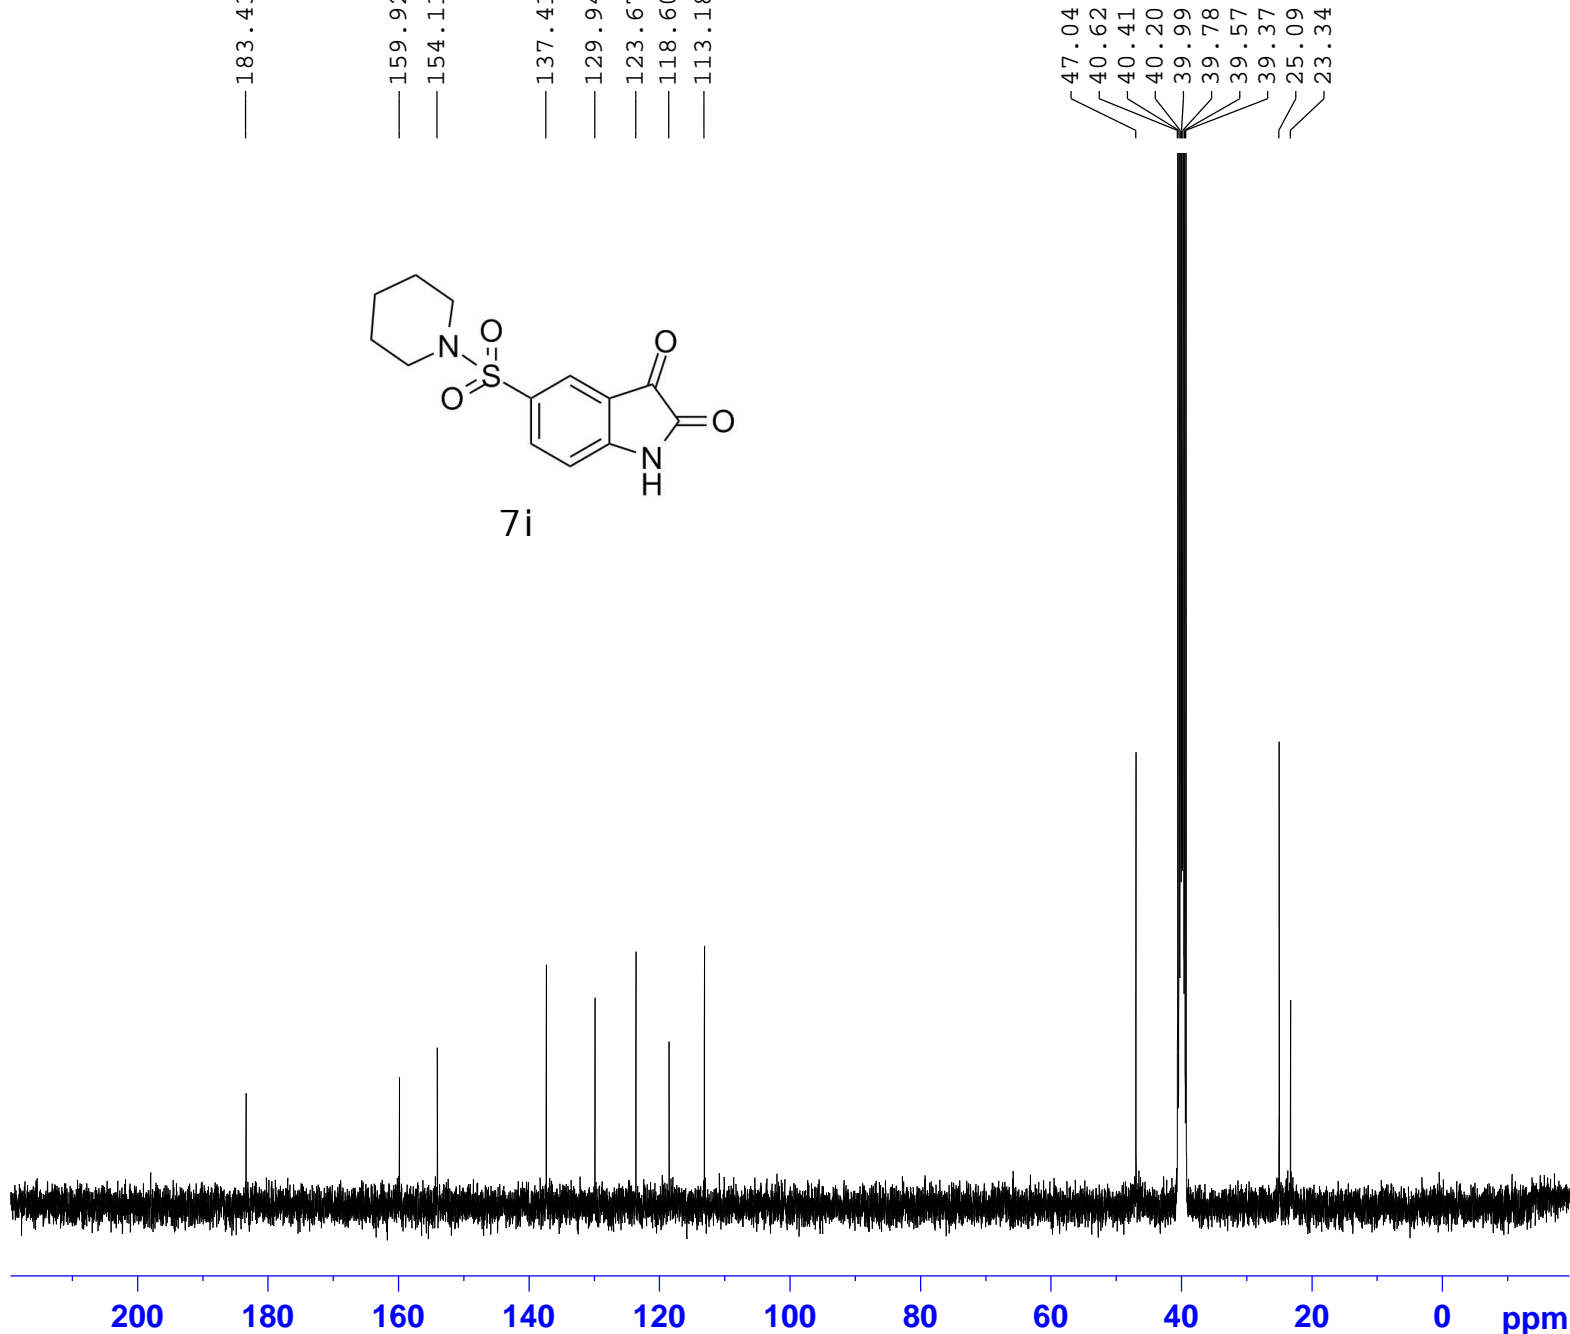

47.04  
40.62  
40.41  
40.20  
39.99  
39.78  
39.57  
39.37  
25.09  
23.34



Current Data Parameters  
NAME ZHM-PAIDING  
EXPNO 10  
PROCNO 1

F2 - Acquisition Parameters  
Date\_ 20121204  
Time 18.26  
INSTRUM spect  
PROBHD 5 mm PABBO BB-  
PULPROG zgpg30  
TD 65536  
SOLVENT DMSO  
NS 1024  
DS 4  
SWH 24038.461 Hz  
FIDRES 0.366798 Hz  
AQ 1.3631988 sec  
RG 203  
DW 20.800 usec  
DE 6.50 usec  
TE 298.0 K  
D1 2.0000000 sec  
D11 0.0300000 sec

==== CHANNEL f1 =====  
NUC1 13C  
P1 9.65 usec  
PLW1 49.65900040 W  
SFO1 100.6228293 MHz

==== CHANNEL f2 =====  
CPDPRG2 waltz16  
NUC2 1H  
PCPD2 90.00 usec  
PLW2 12.85299969 W  
PLW12 0.34196001 W  
PLW13 0.27699000 W  
SFO2 400.1316005 MHz

F2 - Processing parameters  
SI 32768  
SF 100.6127690 MHz  
WDW EM  
SSB 0  
LB 1.00 Hz  
GB 0  
PC 1.40

S20120705-009

20120705

C13CPD DMSO D:\nmr\_data ham

— 183.32

— 159.95

— 154.39

— 137.58

— 128.70

— 123.93

— 118.76

— 113.26

— 65.69

— 46.34

— 40.62

— 40.41

— 40.20

— 39.99

— 39.78

— 39.57

— 39.36

— 0.57

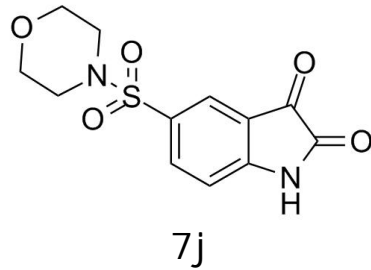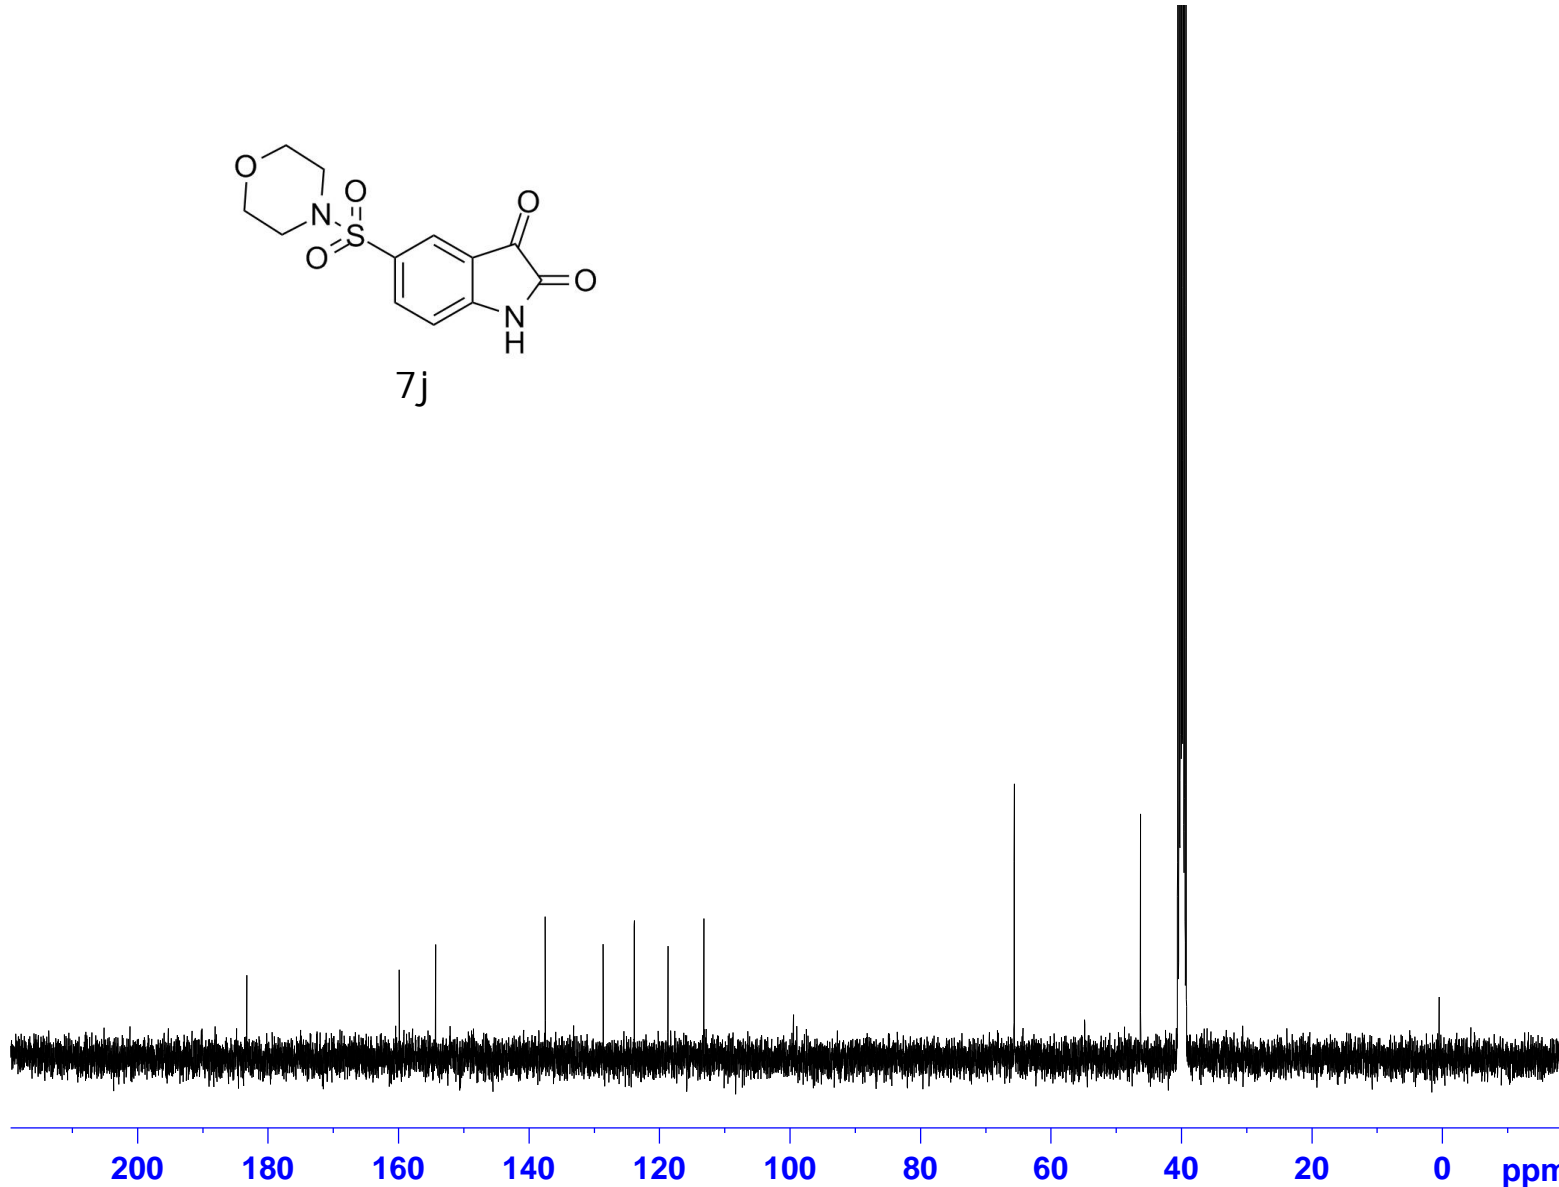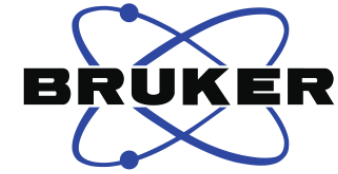

Current Data Parameters  
NAME ZHM-MALIN  
EXPNO 10  
PROCNO 1

F2 - Acquisition Parameters  
Date\_ 20120705  
Time 23.12  
INSTRUM spect  
PROBHD 5 mm PABBO BB-  
PULPROG zgpg30  
TD 65536  
SOLVENT DMSO  
NS 1024  
DS 4  
SWH 24038.461 Hz  
FIDRES 0.366798 Hz  
AQ 1.3631988 sec  
RG 203  
DW 20.800 usec  
DE 6.50 usec  
TE 298.0 K  
D1 2.0000000 sec  
D11 0.0300000 sec

==== CHANNEL f1 =====  
NUC1 13C  
P1 9.65 usec  
PLW1 49.65900040 W  
SFO1 100.6228293 MHz

==== CHANNEL f2 =====  
CPDPRG2 waltz16  
NUC2 1H  
PCPD2 90.00 usec  
PLW2 12.85299969 W  
PLW12 0.34196001 W  
PLW13 0.27699000 W  
SFO2 400.1316005 MHz

F2 - Processing parameters  
SI 32768  
SF 100.6127690 MHz  
WDW EM  
SSB 0  
LB 1.00 Hz  
GB 0  
PC 1.40

S20121115-044

20121115

C13CPD DMSO D:\nmr\_data ham

— 183.43  
— 159.91  
— 154.11  
— 137.40  
— 130.04  
— 123.67  
— 118.59  
— 113.19

46.50  
40.63  
40.42  
40.21  
40.00  
39.79  
39.58  
39.37  
33.24  
31.15  
29.77  
21.73



Current Data Parameters  
NAME ZHM-4JIAPAI  
EXPNO 10  
PROCNO 1

F2 - Acquisition Parameters

Date\_ 20121121  
Time 18.00  
INSTRUM spect  
PROBHD 5 mm PABBO BB-  
PULPROG zgpg30  
TD 65536  
SOLVENT DMSO  
NS 1024  
DS 4  
SWH 24038.461 Hz  
FIDRES 0.366798 Hz  
AQ 1.3631988 sec  
RG 203  
DW 20.800 usec  
DE 6.50 usec  
TE 299.7 K  
D1 2.00000000 sec  
D11 0.03000000 sec

==== CHANNEL f1 =====

NUC1 13C  
P1 9.65 usec  
PLW1 49.65900040 W  
SFO1 100.6228293 MHz

==== CHANNEL f2 =====

CPDPRG2 waltz16  
NUC2 1H  
PCPD2 90.00 usec  
PLW2 12.85299969 W  
PLW12 0.34196001 W  
PLW13 0.27699000 W  
SFO2 400.1316005 MHz

F2 - Processing parameters

SI 32768  
SF 100.6127690 MHz  
WDW EM  
SSB 0  
LB 1.00 Hz  
GB 0  
PC 1.40

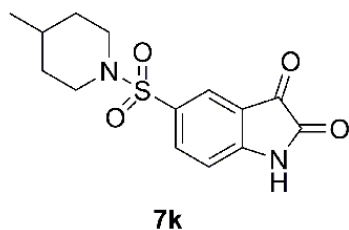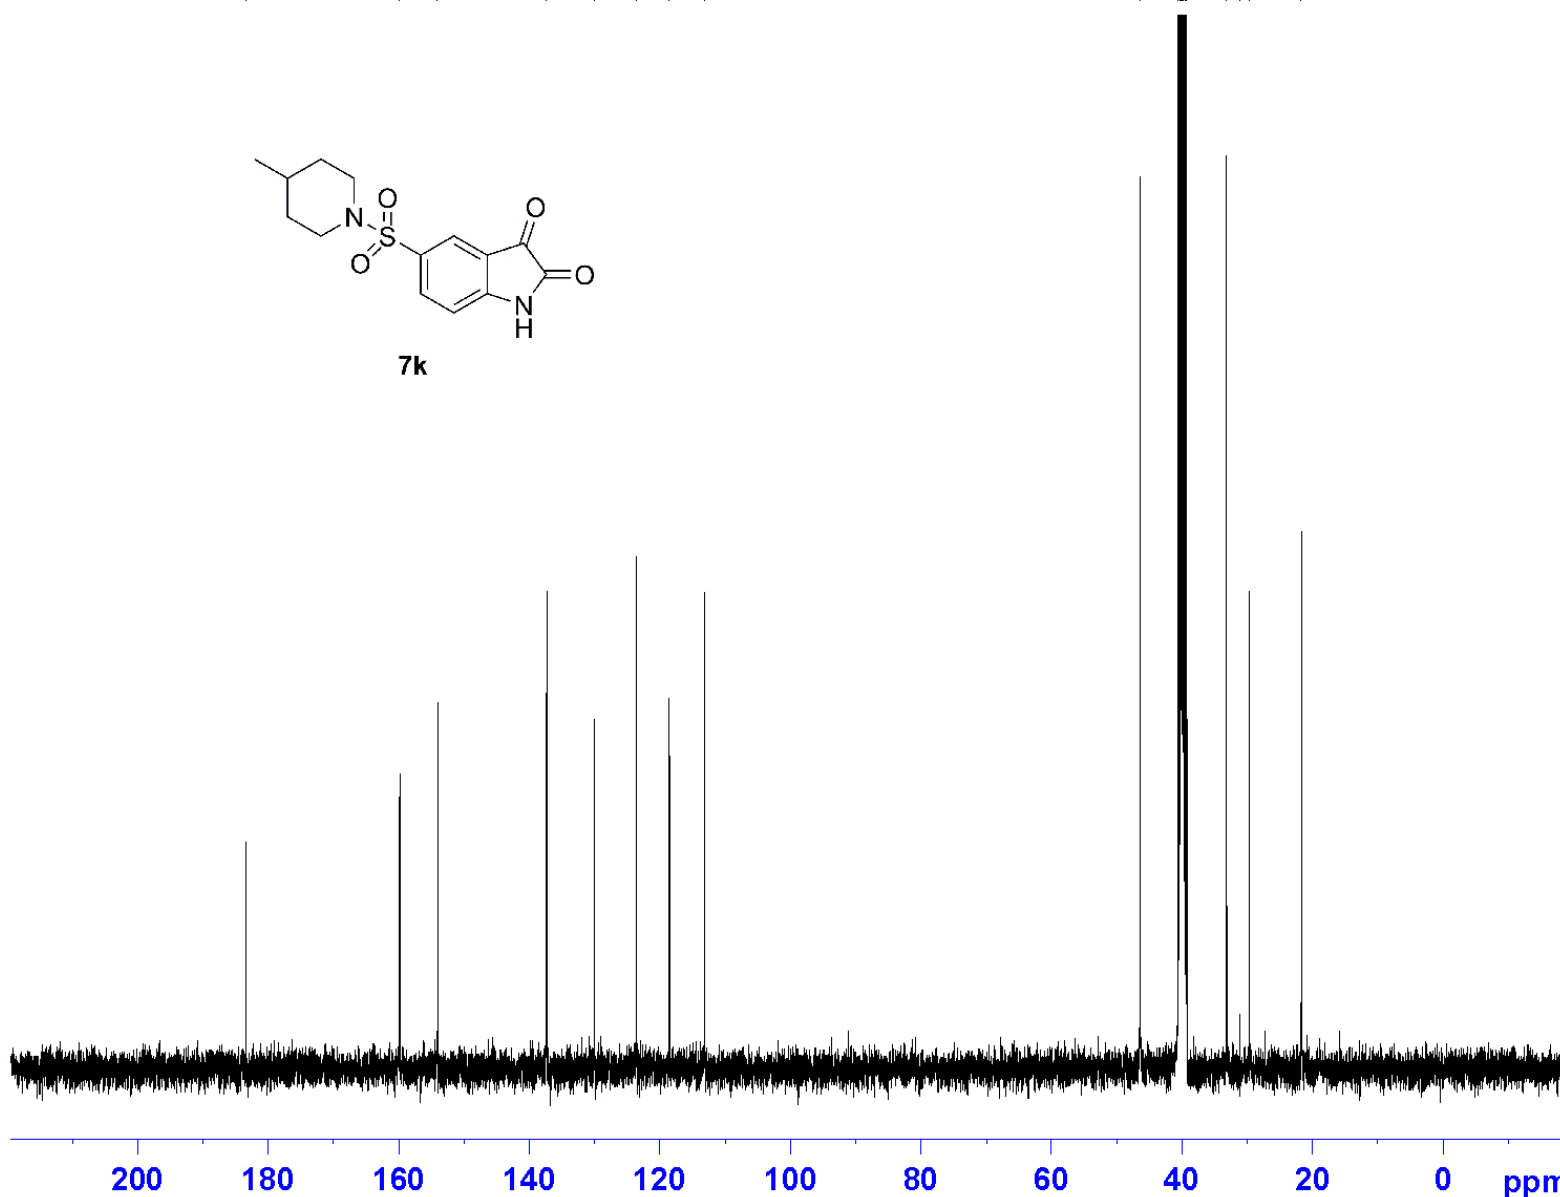



S20121127-048

20121127

C13CPD DMSO D:\nmr\_data ham

— 183.49  
— 159.96  
— 153.71  
— 136.62  
— 135.38  
— 122.91  
— 118.61  
— 113.23

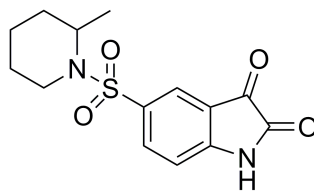

48.69  
40.62  
40.41  
40.20  
39.99  
39.78  
39.57  
39.37  
30.28  
25.16  
18.05  
15.72

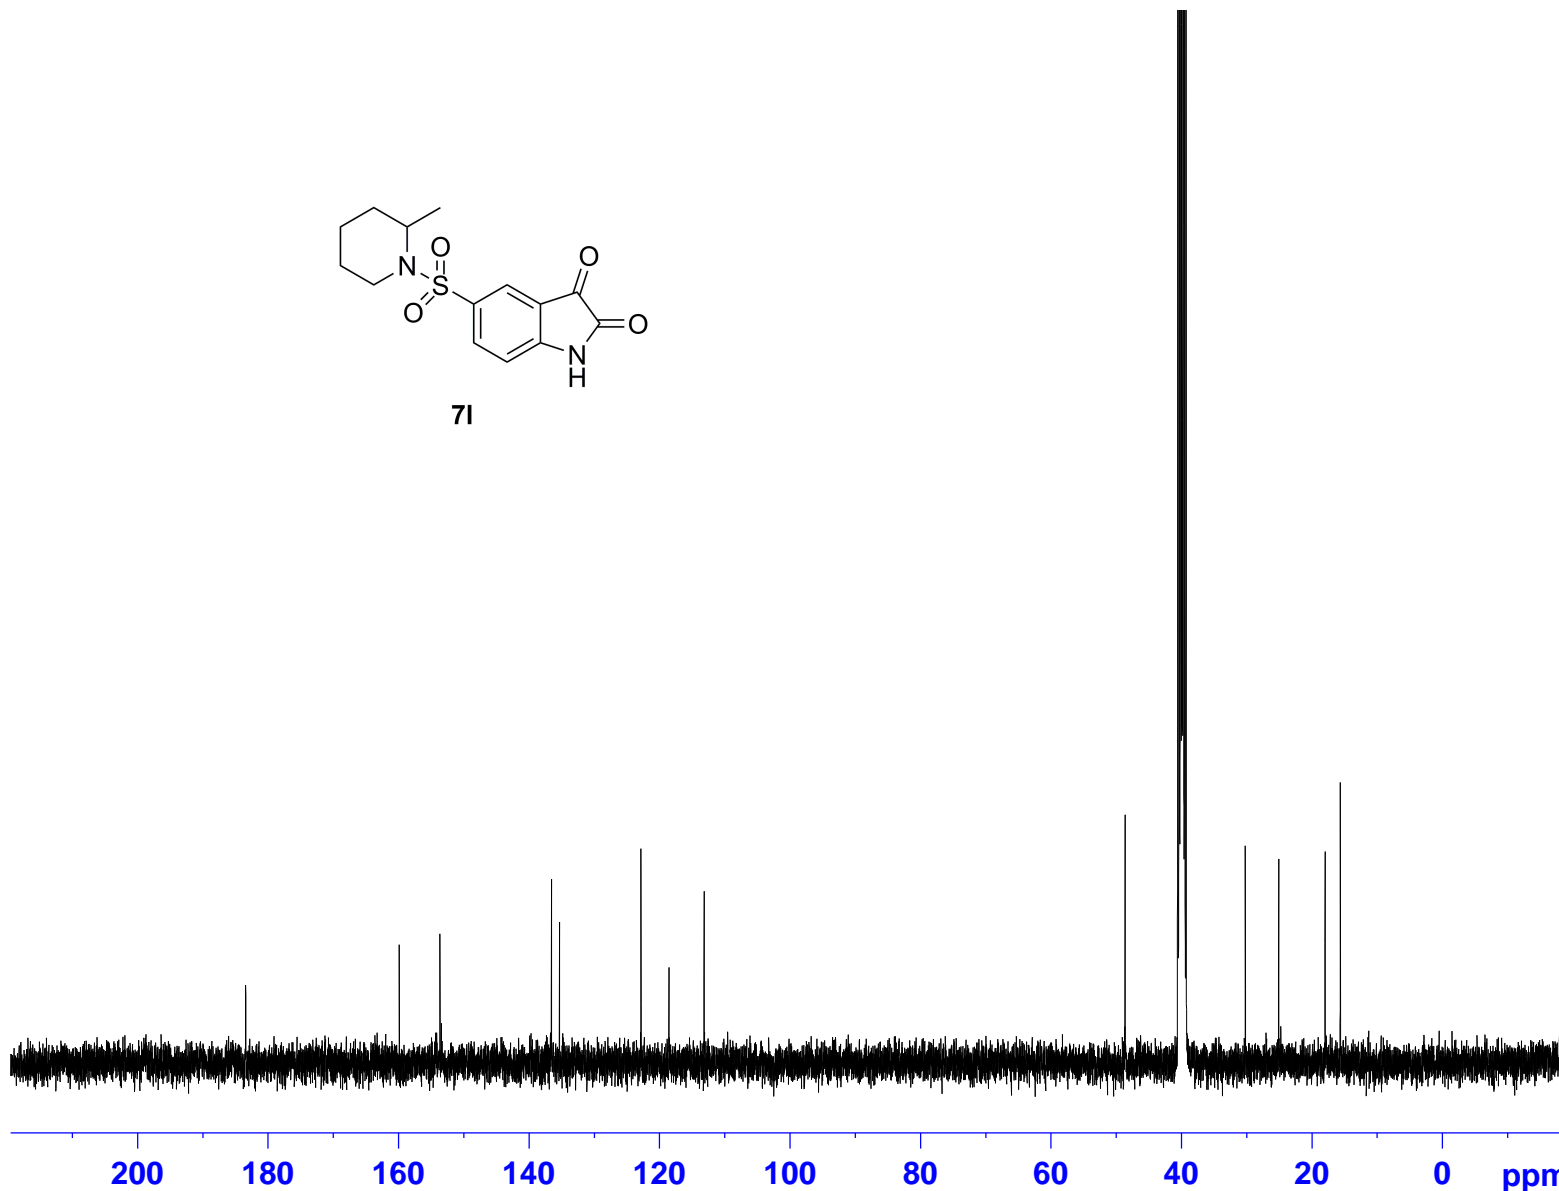

Current Data Parameters  
NAME ZHM-ERJIAPADING  
EXPNO 10  
PROCNO 1

F2 - Acquisition Parameters  
Date\_ 20121127  
Time 21.33  
INSTRUM spect  
PROBHD 5 mm PABBO BB-  
PULPROG zgpg30  
TD 65536  
SOLVENT DMSO  
NS 1024  
DS 4  
SWH 24038.461 Hz  
FIDRES 0.366798 Hz  
AQ 1.3631988 sec  
RG 203  
DW 20.800 usec  
DE 6.50 usec  
TE 298.0 K  
D1 2.0000000 sec  
D11 0.0300000 sec

==== CHANNEL f1 =====  
NUC1 13C  
P1 9.65 usec  
PLW1 49.65900040 W  
SFO1 100.6228293 MHz

==== CHANNEL f2 =====  
CPDPRG2 waltz16  
NUC2 1H  
PCPD2 90.00 usec  
PLW2 12.85299969 W  
PLW12 0.34196001 W  
PLW13 0.27699000 W  
SFO2 400.1316005 MHz

F2 - Processing parameters  
SI 32768  
SF 100.6127690 MHz  
WDW EM  
SSB 0  
LB 1.00 Hz  
GB 0  
PC 1.40

S20130105-009

20130105

C13CPD DMSO D:\nmr\_data ham

— 183.47  
— 159.91  
— 154.11  
— 137.35  
— 130.13  
— 123.63  
— 118.62  
— 113.24

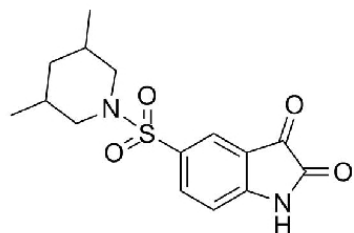

**7m**

52.67  
41.10  
40.61  
40.41  
40.20  
39.99  
39.78  
39.57  
39.36  
30.93  
19.22  
— 0.57

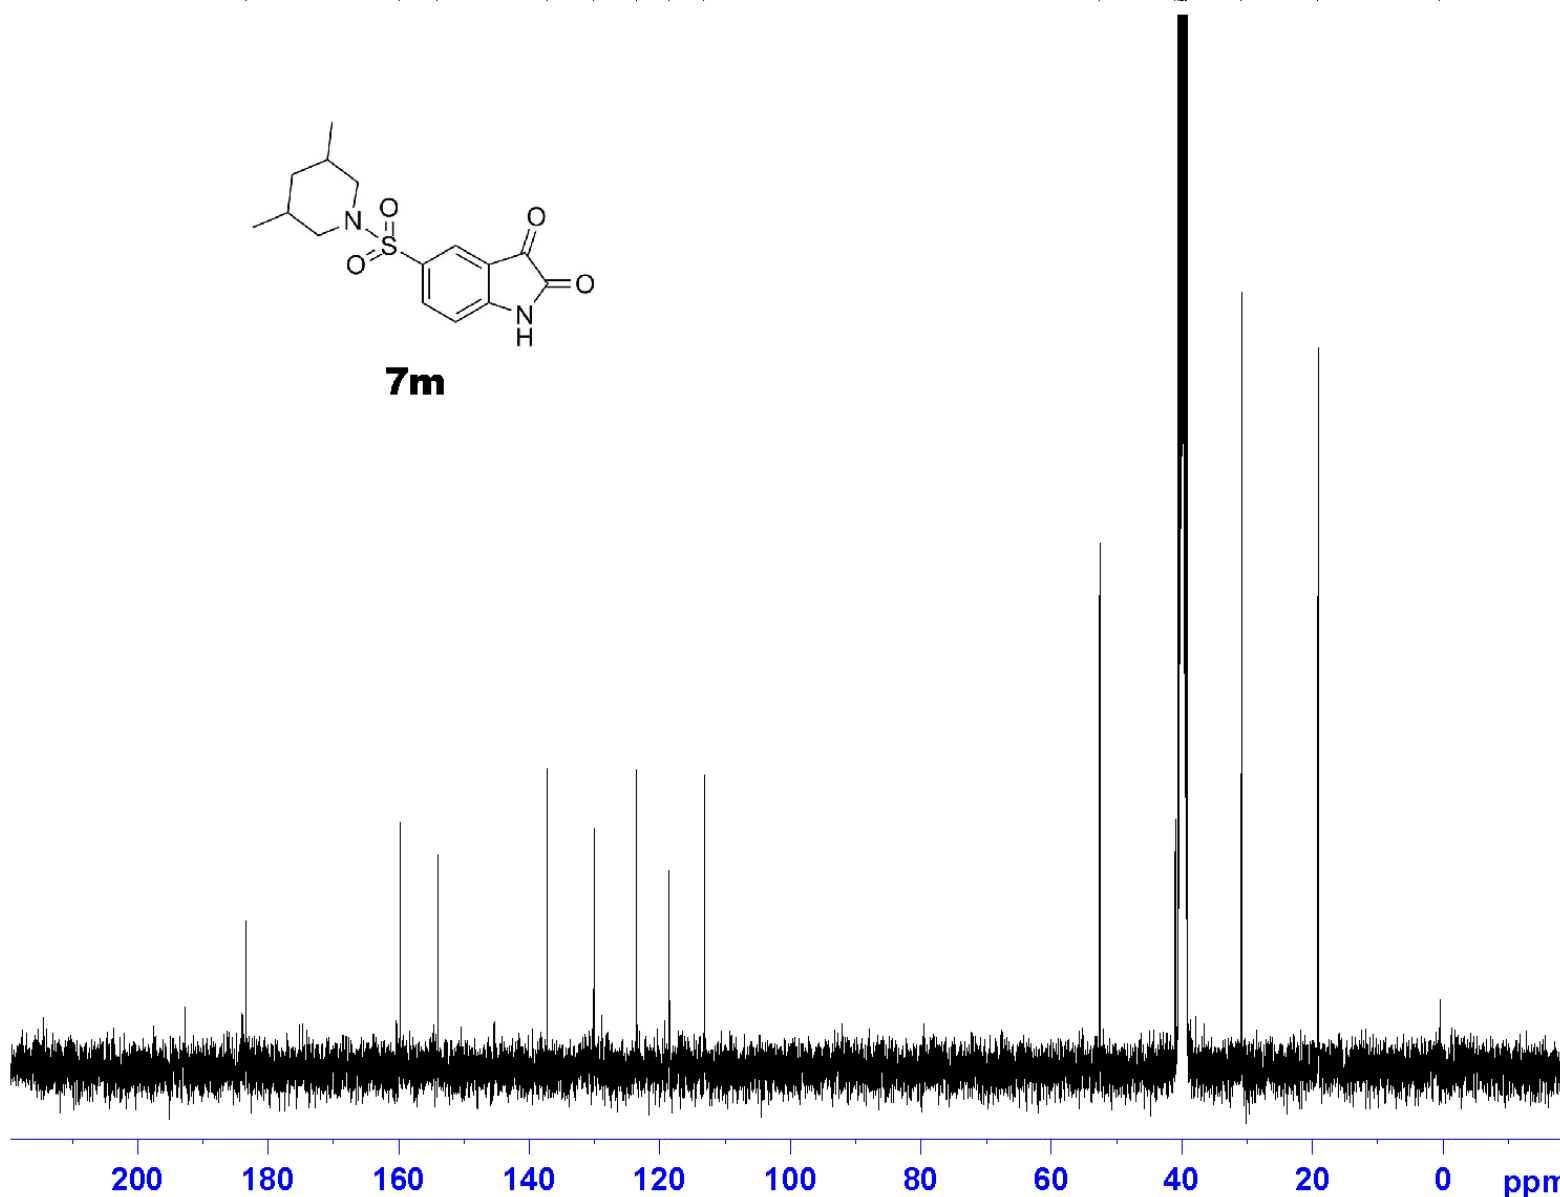

Current Data Parameters  
NAME ZHM-3.5ERJIA  
EXPNO 10  
PROCNO 1

F2 - Acquisition Parameters  
Date\_ 20130105  
Time 19.18  
INSTRUM spect  
PROBHD 5 mm PABBO BB-  
PULPROG zgpg30  
TD 65536  
SOLVENT DMSO  
NS 2048  
DS 4  
SWH 24038.461 Hz  
FIDRES 0.366798 Hz  
AQ 1.3631988 sec  
RG 203  
DW 20.800 usec  
DE 6.50 usec  
TE 298.0 K  
D1 2.00000000 sec  
D11 0.03000000 sec

==== CHANNEL f1 =====  
NUC1 13C  
P1 9.65 usec  
PLW1 49.65900040 W  
SFO1 100.6228293 MHz

==== CHANNEL f2 =====  
CPDPRG2 waltz16  
NUC2 1H  
PCPD2 90.00 usec  
PLW2 12.85299969 W  
PLW12 0.34196001 W  
PLW13 0.27699000 W  
SFO2 400.1316005 MHz

F2 - Processing parameters  
SI 32768  
SF 100.6127690 MHz  
WDW EM  
SSB 0  
LB 1.00 Hz  
GB 0  
PC 1.40

S20120702-029

20120702

C13CPD CDCl3 D:\nmr\_data ham

157.72  
154.27  
137.78  
131.72  
124.74  
117.24  
110.23

77.33  
77.21  
77.01  
76.69

53.91  
45.86  
45.65

26.65

-0.01

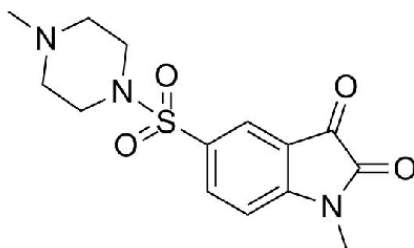

**8a1**

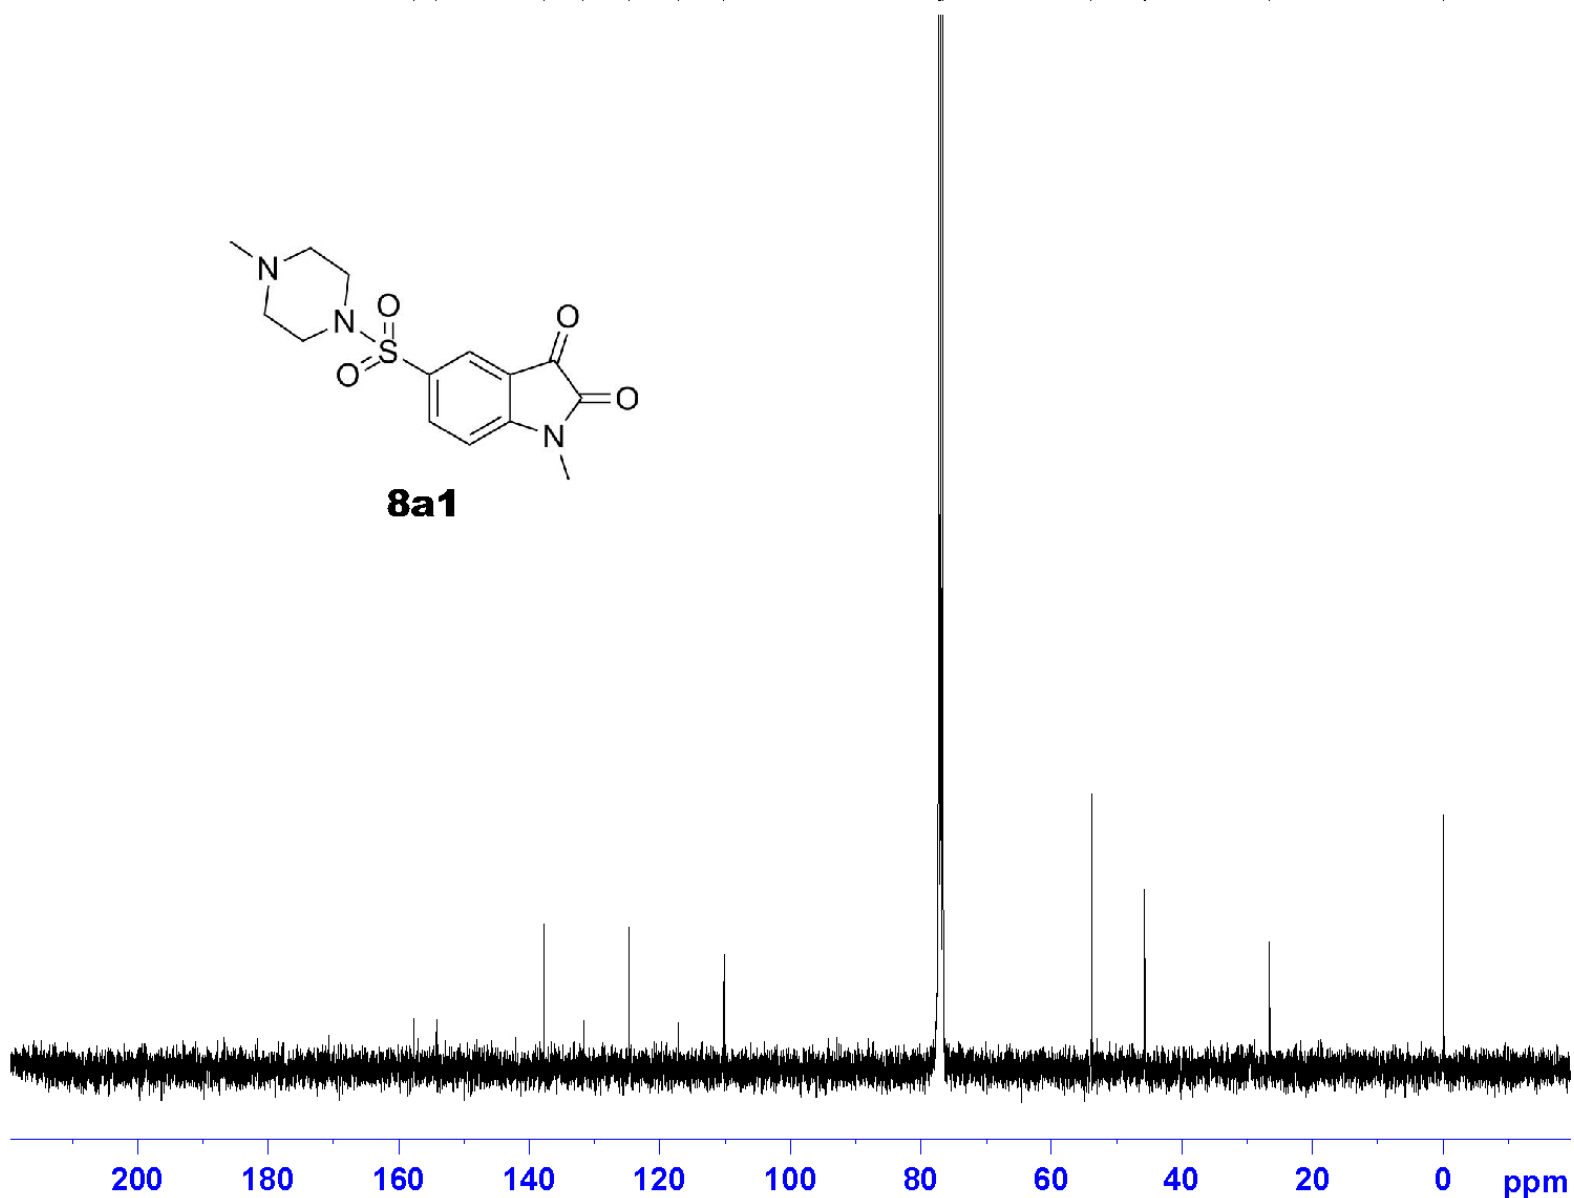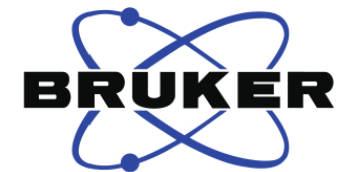

Current Data Parameters  
NAME NJIAPAIJIA  
EXPNO 10  
PROCNO 1

F2 - Acquisition Parameters  
Date\_ 20120703  
Time 0.29  
INSTRUM spect  
PROBHD 5 mm PABBO BB-  
PULPROG zgpg30  
TD 65536  
SOLVENT CDCl3  
NS 1024  
DS 4  
SWH 24038.461 Hz  
FIDRES 0.366798 Hz  
AQ 1.3631988 sec  
RG 203  
DW 20.800 usec  
DE 6.50 usec  
TE 299.9 K  
D1 2.00000000 sec  
D11 0.03000000 sec

==== CHANNEL f1 =====  
NUC1 13C  
P1 9.65 usec  
PLW1 49.65900040 W  
SFO1 100.6228293 MHz

==== CHANNEL f2 =====  
CPDPRG2 waltz16  
NUC2 1H  
PCPD2 90.00 usec  
PLW2 12.85299969 W  
PLW12 0.34196001 W  
PLW13 0.27699000 W  
SFO2 400.1316005 MHz

F2 - Processing parameters  
SI 32768  
SF 100.6127690 MHz  
WDW EM  
SSB 0  
LB 1.00 Hz  
GB 0  
PC 1.40

S20130105-016

20130105

C13CPD CDCl3 D:\nmr\_data ham

181.66  
157.74  
153.59  
137.59  
133.54  
131.58  
129.35  
128.61  
127.39  
124.85  
117.46  
111.36

77.34  
77.22  
77.02  
76.70

53.82  
45.69  
45.52  
44.47

-0.01



Current Data Parameters  
NAME ZHM-NJIABIAN  
EXPNO 10  
PROCNO 1

F2 - Acquisition Parameters  
Date\_ 20130105  
Time 22.47  
INSTRUM spect  
PROBHD 5 mm PABBO BB-  
PULPROG zgpg30  
TD 65536  
SOLVENT CDCl3  
NS 1024  
DS 4  
SWH 24038.461 Hz  
FIDRES 0.366798 Hz  
AQ 1.3631988 sec  
RG 203  
DW 20.800 usec  
DE 6.50 usec  
TE 298.0 K  
D1 2.00000000 sec  
D11 0.03000000 sec

==== CHANNEL f1 =====  
NUC1 13C  
P1 9.65 usec  
PLW1 49.65900040 W  
SFO1 100.6228293 MHz

==== CHANNEL f2 =====  
CPDPRG2 waltz16  
NUC2 1H  
PCPD2 90.00 usec  
PLW2 12.85299969 W  
PLW12 0.34196001 W  
PLW13 0.27699000 W  
SFO2 400.1316005 MHz

F2 - Processing parameters  
SI 32768  
SF 100.6127690 MHz  
WDW EM  
SSB 0  
LB 1.00 Hz  
GB 0  
PC 1.40

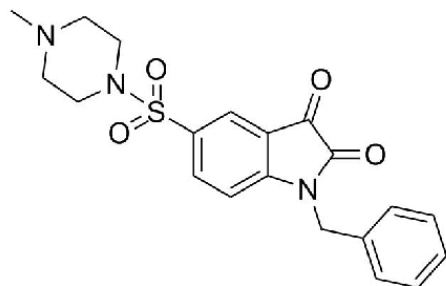

8a2

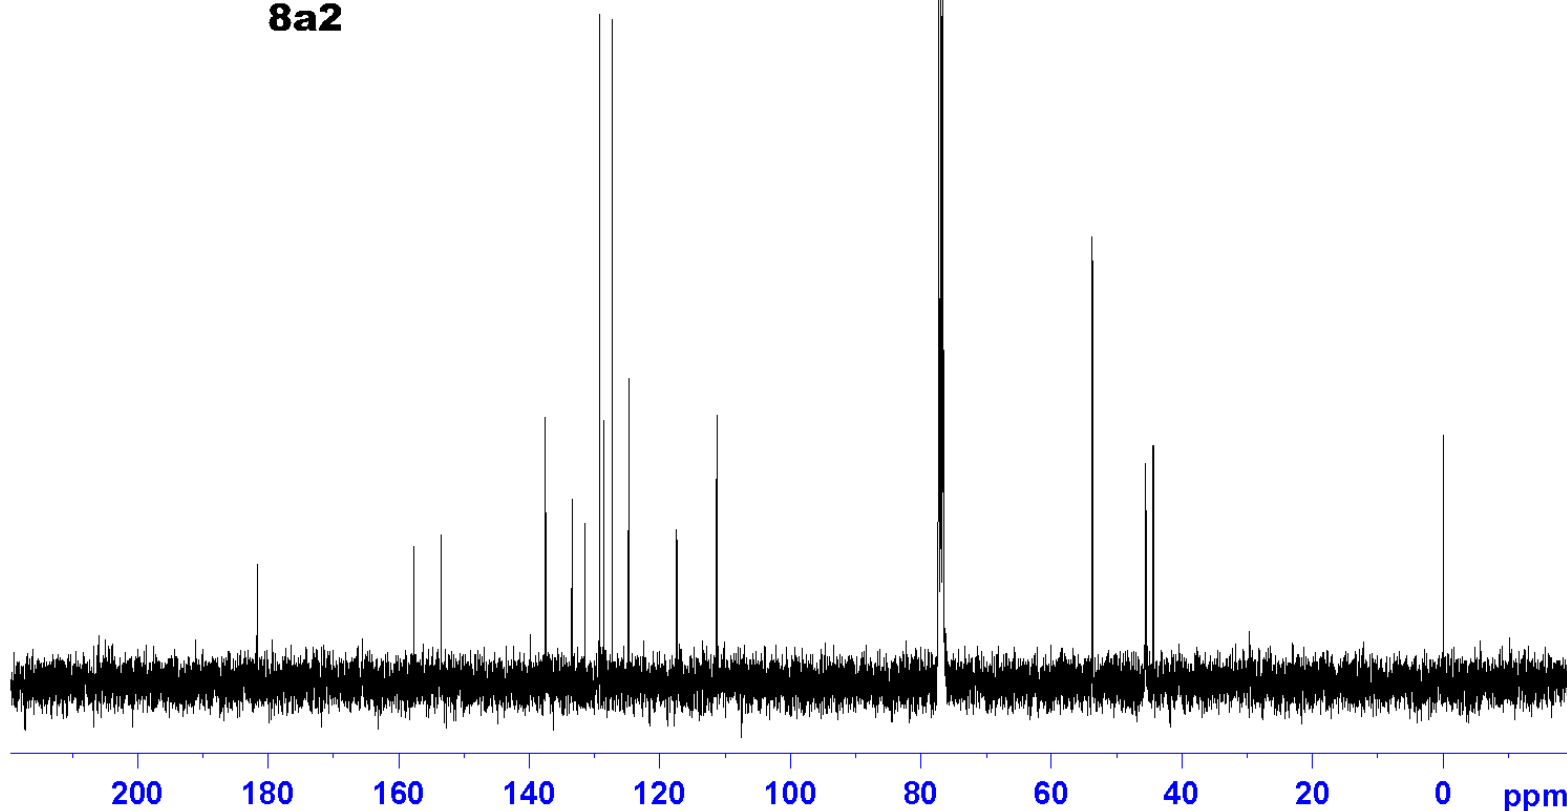

S20120702-028

20120702

C13CPD CDCl3 D:\nmr data ham



Current Data Parameters  
NAME NJIAPAINAI  
EXPNO 10  
PROCNO 1

F2 - Acquisition Parameters  
Date\_ 20120702  
Time 23.25  
INSTRUM spect  
PROBHD 5 mm PABBO BB-  
PULPROG zgpg30  
TD 65536  
SOLVENT CDCl3  
NS 1024  
DS 4  
SWH 24038.461 Hz  
FIDRES 0.366798 Hz  
AQ 1.3631988 sec  
RG 203  
DW 20.800 usec  
DE 6.50 usec  
TE 300.2 K  
D1 2.00000000 sec  
D11 0.03000000 sec

==== CHANNEL f1 =====  
NUC1 13C  
P1 9.65 usec  
PLW1 49.65900040 W  
SFO1 100.6228293 MHz

==== CHANNEL f2 =====  
CPDPRG2 waltz16  
NUC2 1H  
PCPD2 90.00 usec  
PLW2 12.85299969 W  
PLW12 0.34196001 W  
PLW13 0.27699000 W  
SFO2 400.1316005 MHz

F2 - Processing parameters  
SI 32768  
SF 100.6127690 MHz  
WDW EM  
SSB 0  
LB 1.00 Hz  
GB 0  
PC 1.40

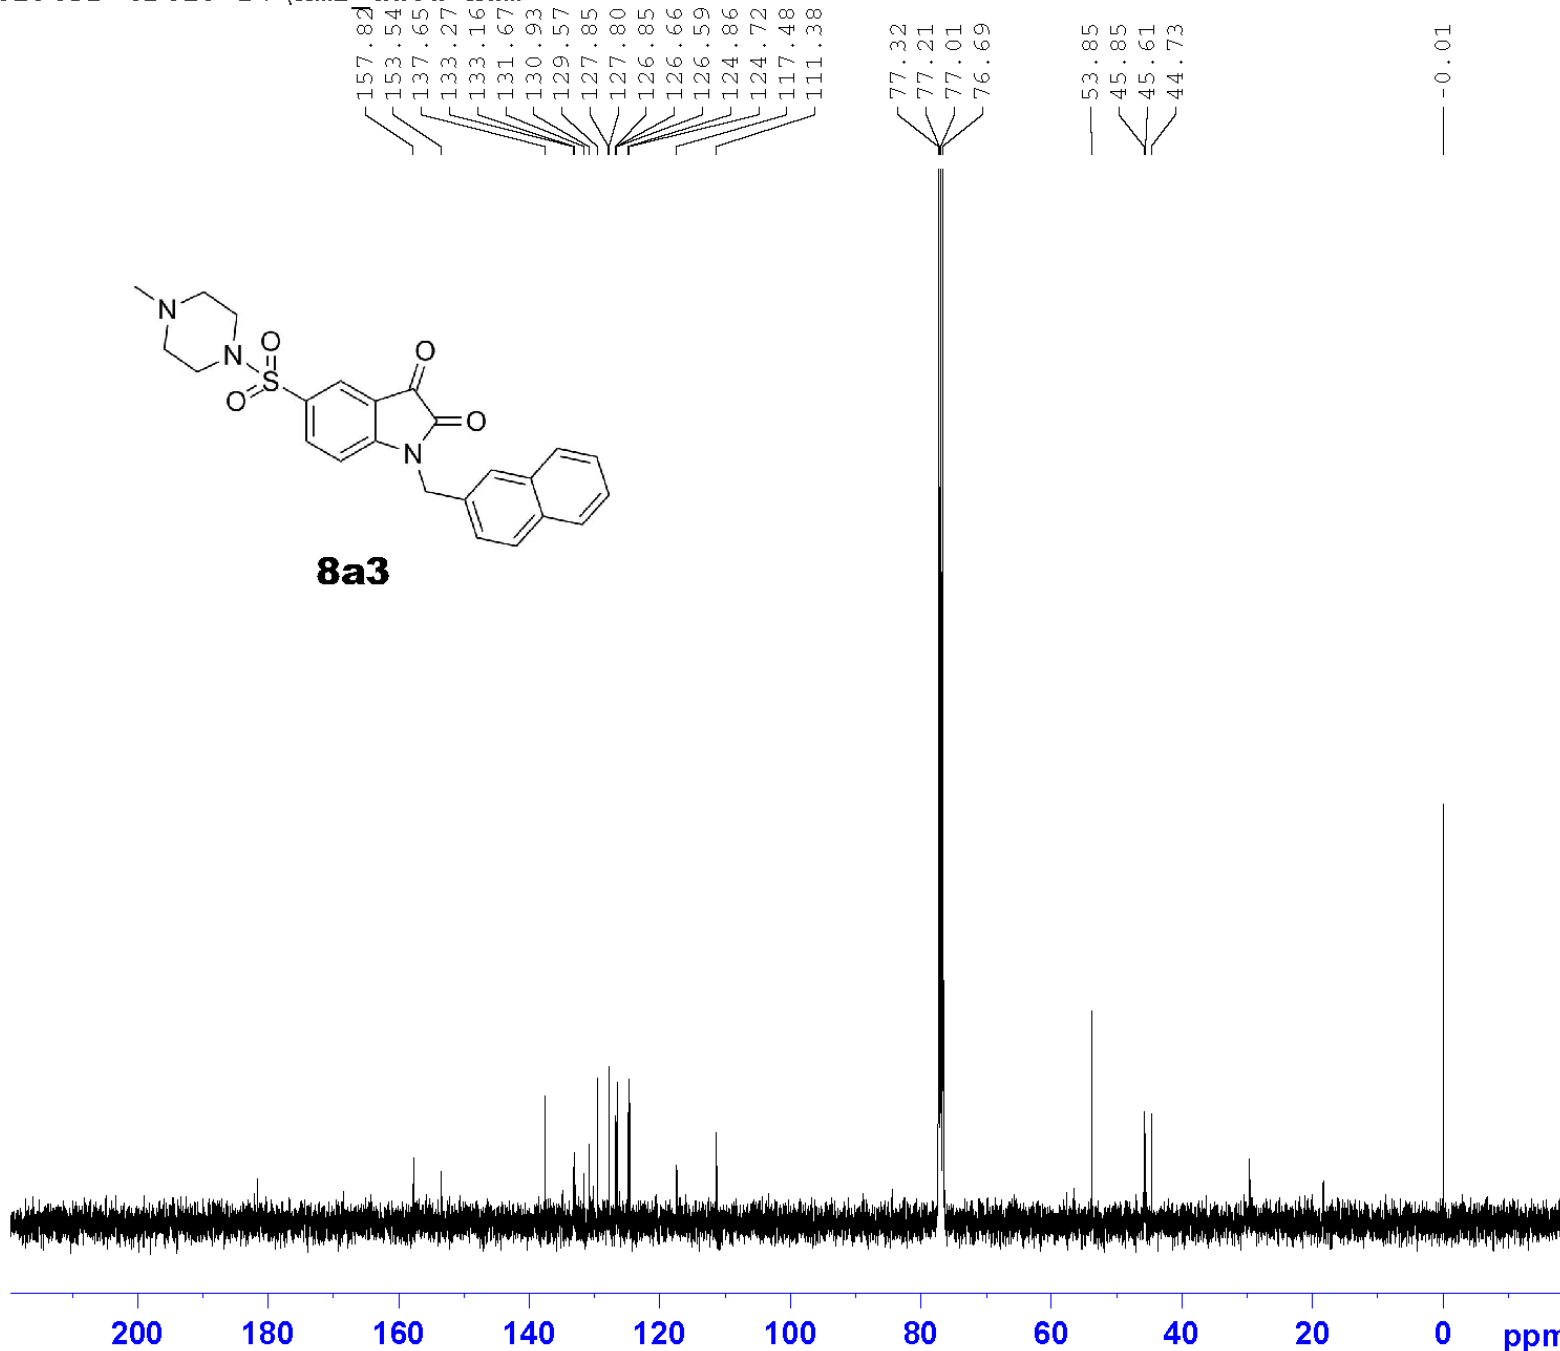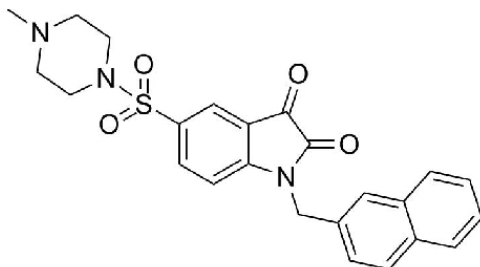

8a3

S20130415-023

20130415

C13CPD DMSO D:\nmr\_data ham

181.84  
159.09  
153.91  
147.70  
137.28  
135.52  
129.57  
129.12  
128.10  
127.86  
123.41  
118.90  
118.59  
118.52  
115.94  
115.72  
111.98

49.12  
46.32  
43.71  
40.62  
40.41  
40.20  
39.99  
39.78  
39.57  
39.36

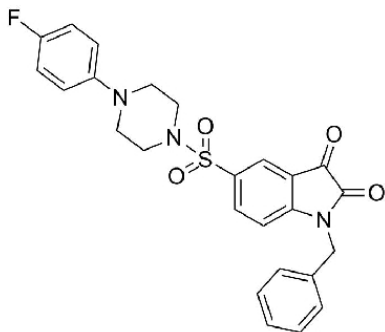

**8b2**

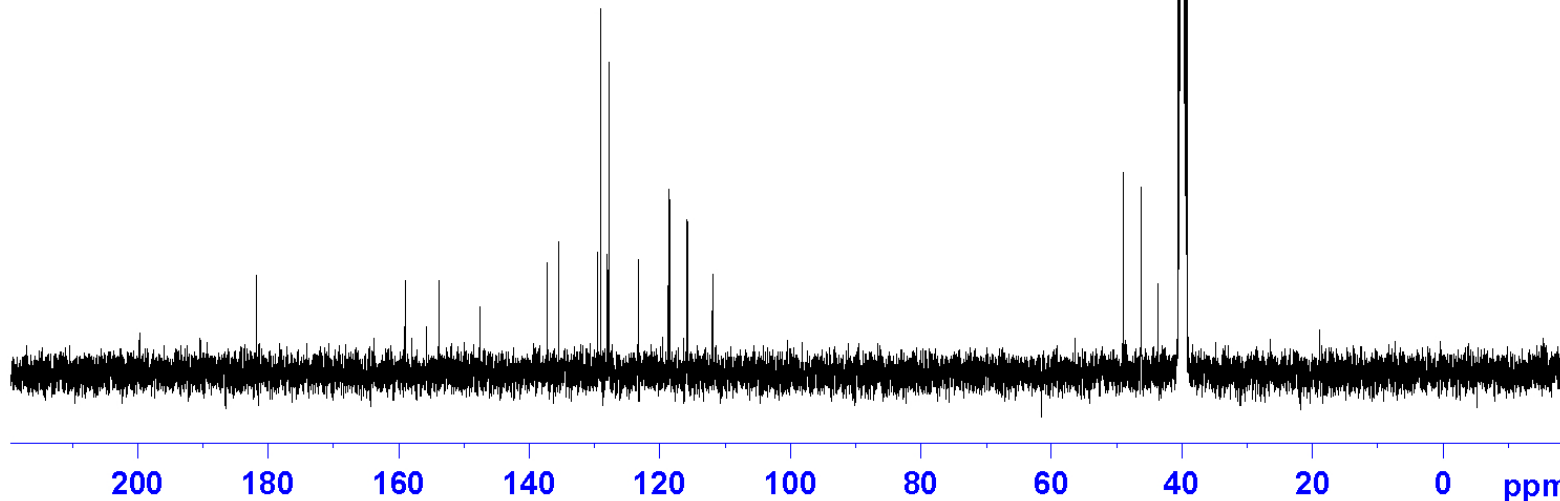

Current Data Parameters  
NAME ZHM-4FBian  
EXPNO 11  
PROCNO 1

F2 - Acquisition Parameters  
Date\_ 20130416  
Time 3.19  
INSTRUM spect  
PROBHD 5 mm PABBO BB-  
PULPROG zgpg30  
TD 65536  
SOLVENT DMSO  
NS 1024  
DS 4  
SWH 24038.461 Hz  
FIDRES 0.366798 Hz  
AQ 1.3631988 sec  
RG 203  
DW 20.800 usec  
DE 6.50 usec  
TE 298.0 K  
D1 2.00000000 sec  
D11 0.03000000 sec

==== CHANNEL f1 =====  
NUC1 13C  
P1 9.65 usec  
PLW1 49.65900040 W  
SFO1 100.6228293 MHz

==== CHANNEL f2 =====  
CPDPRG2 waltz16  
NUC2 1H  
PCPD2 90.00 usec  
PLW2 12.85299969 W  
PLW12 0.34196001 W  
PLW13 0.27699000 W  
SFO2 400.1316005 MHz

F2 - Processing parameters  
SI 32768  
SF 100.6127690 MHz  
WDW EM  
SSB 0  
LB 1.00 Hz  
GB 0  
PC 1.40

S20130114-017

20130114

C13CPD DMSO D:\nmr data ham

181.92  
159.17  
158.11  
155.76  
153.96  
147.64  
137.31  
133.35  
133.03  
132.86  
131.49  
129.66  
129.43  
128.82  
128.06  
126.85  
126.55  
126.28  
125.98  
123.42  
118.97  
118.59  
118.51  
115.93  
115.71  
112.03

49.12  
46.28  
43.93  
40.62  
40.41  
40.20  
39.99  
39.79  
39.58  
39.37

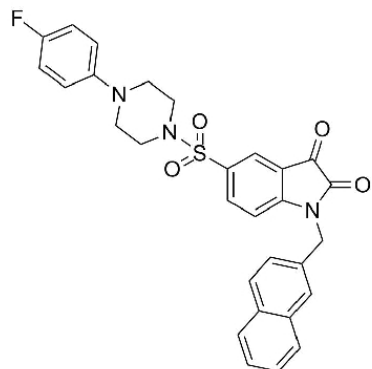

**8b3**

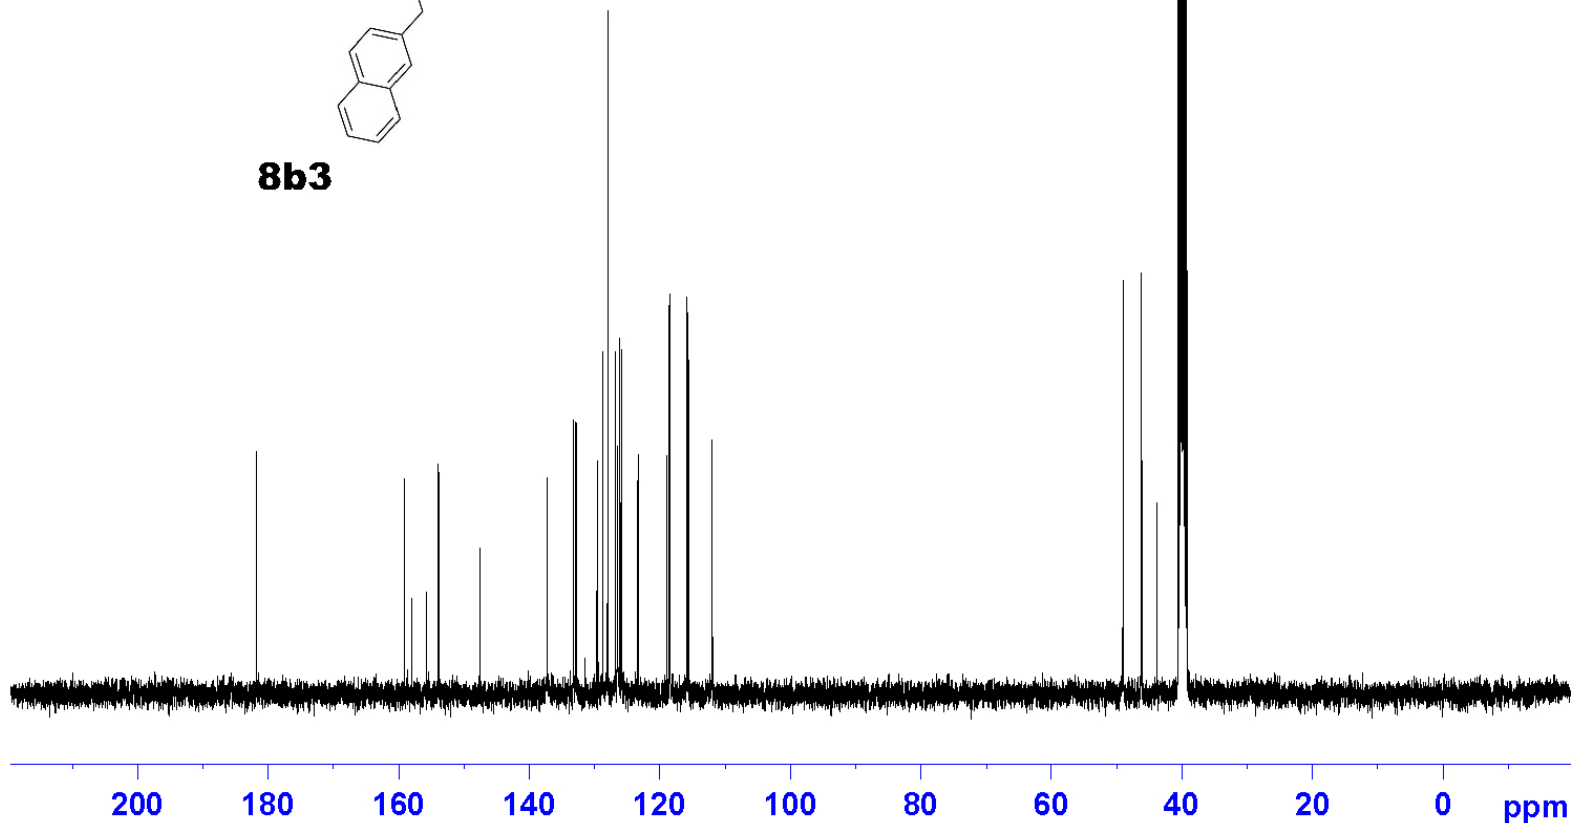

Current Data Parameters  
NAME ZHM-4FNAI  
EXPNO 10  
PROCNO 1

F2 - Acquisition Parameters  
Date\_ 20130114  
Time 21.24  
INSTRUM spect  
PROBHD 5 mm PABBO BB-  
PULPROG zgpg30  
TD 65536  
SOLVENT DMSO  
NS 1024  
DS 4  
SWH 24038.461 Hz  
FIDRES 0.366798 Hz  
AQ 1.3631988 sec  
RG 203  
DW 20.800 usec  
DE 6.50 usec  
TE 299.2 K  
D1 2.00000000 sec  
D11 0.03000000 sec

==== CHANNEL f1 =====  
NUC1 13C  
P1 9.65 usec  
PLW1 49.65900040 W  
SFO1 100.6228293 MHz

==== CHANNEL f2 =====  
CPDPRG2 waltz16  
NUC2 1H  
PCPD2 90.00 usec  
PLW2 12.85299969 W  
PLW12 0.34196001 W  
PLW13 0.27699000 W  
SFO2 400.1316005 MHz

F2 - Processing parameters  
SI 32768  
SF 100.6127690 MHz  
WDW EM  
SSB 0  
LB 1.00 Hz  
GB 0  
PC 1.40

S20121115-053

20121115

C13CPD CDC13 D:\nmr data ham



Current Data Parameters  
NAME ZHM-3.5ERJIA  
EXPNO 10  
PROCNO 1

F2 - Acquisition Parameters  
Date\_ 20121122  
Time 2.24  
INSTRUM spect  
PROBHD 5 mm PABBO BB-  
PULPROG zgpg30  
TD 65536  
SOLVENT CDCl3  
NS 1024  
DS 4  
SWH 24038.461 Hz  
FIDRES 0.366798 Hz  
AQ 1.3631988 sec  
RG 203  
DW 20.800 usec  
DE 6.50 usec  
TE 299.7 K  
D1 2.00000000 sec  
D11 0.03000000 sec

==== CHANNEL f1 =====  
NUC1 13C  
P1 9.65 usec  
PLW1 49.65900040 W  
SFO1 100.6228293 MHz

==== CHANNEL f2 =====  
CPDPRG2 waltz16  
NUC2 1H  
PCPD2 90.00 usec  
PLW2 12.85299969 W  
PLW12 0.34196001 W  
PLW13 0.27699000 W  
SFO2 400.1316005 MHz

F2 - Processing parameters  
SI 32768  
SF 100.6127690 MHz  
WDW EM  
SSB 0  
LB 1.00 Hz  
GB 0  
PC 1.40

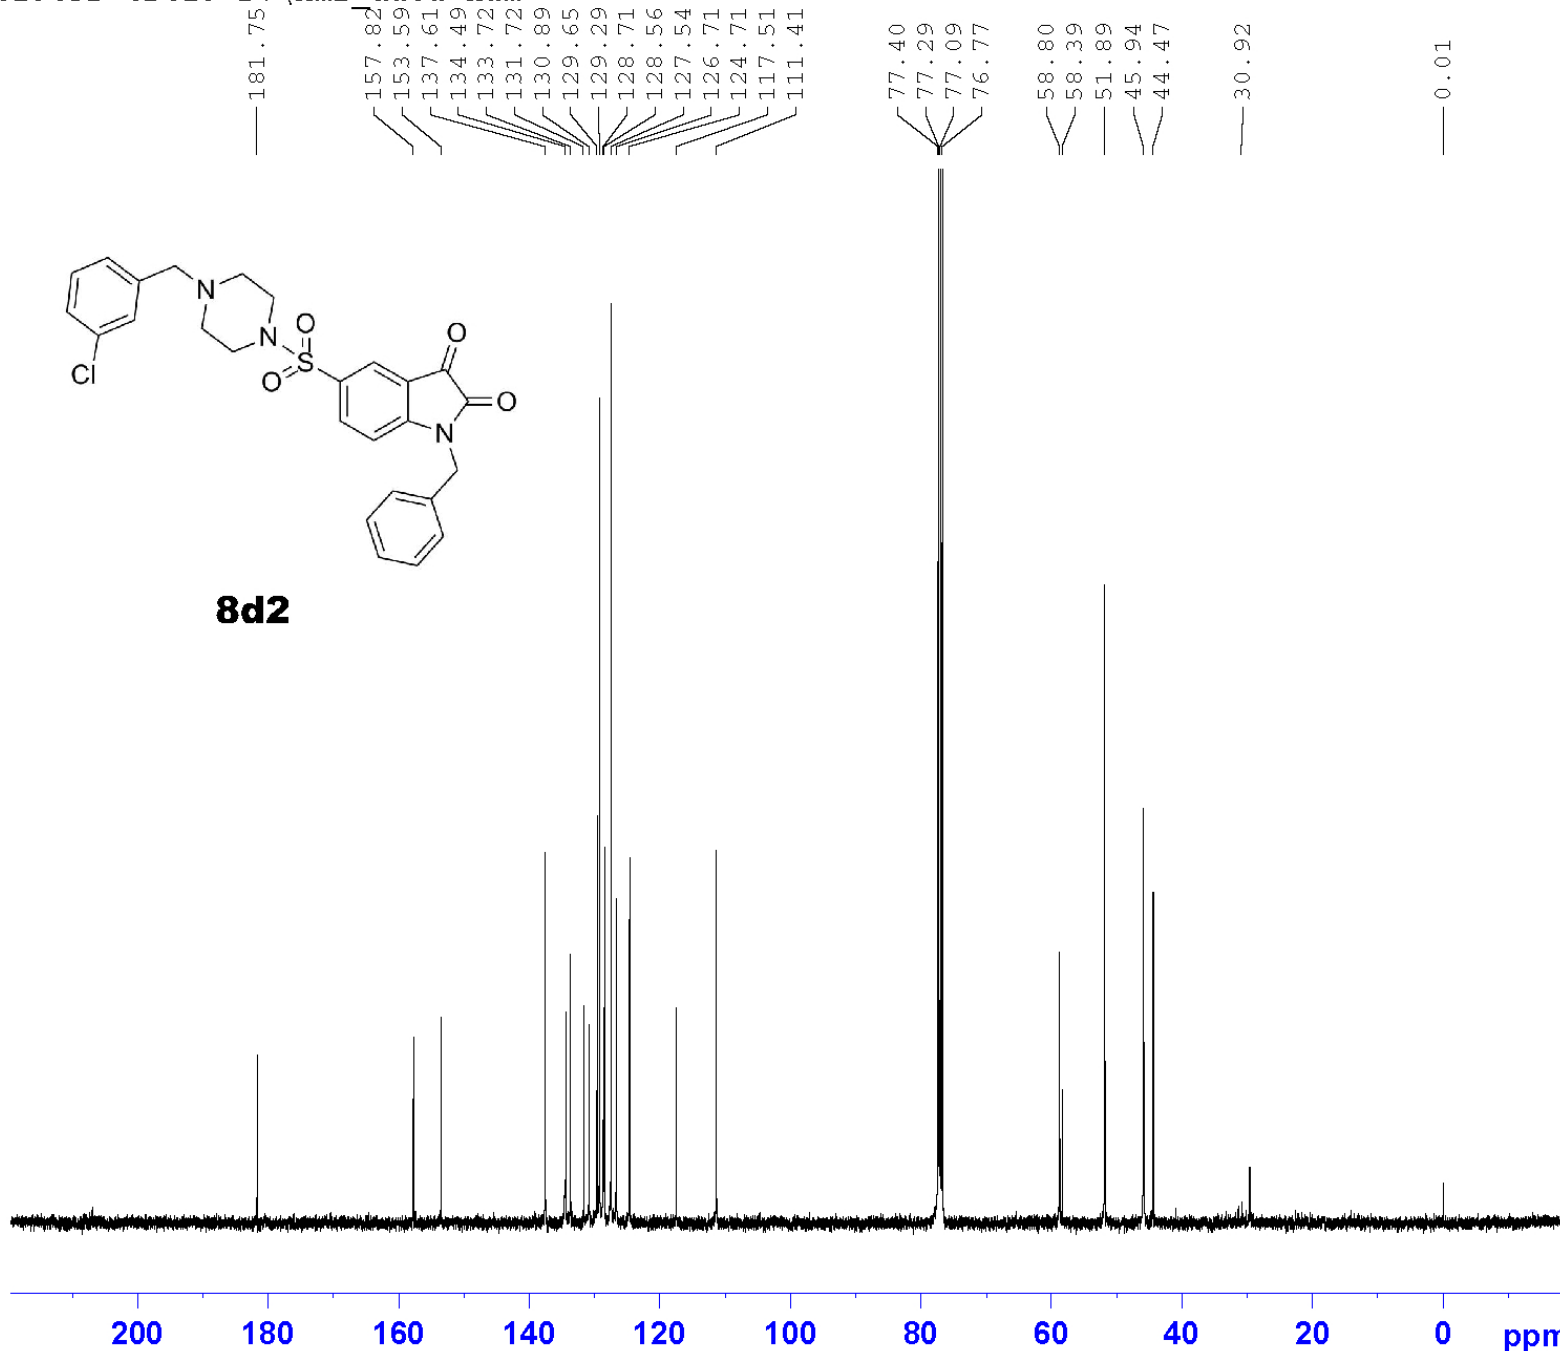



S20121115-047

20121115

C13CPD CDCl3 D:\nmr data ham

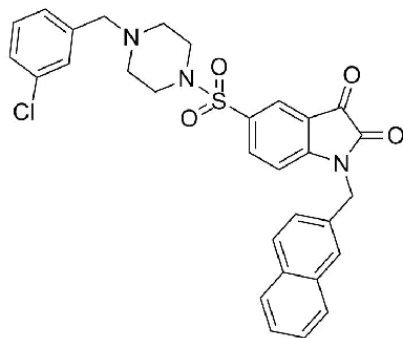

8d3

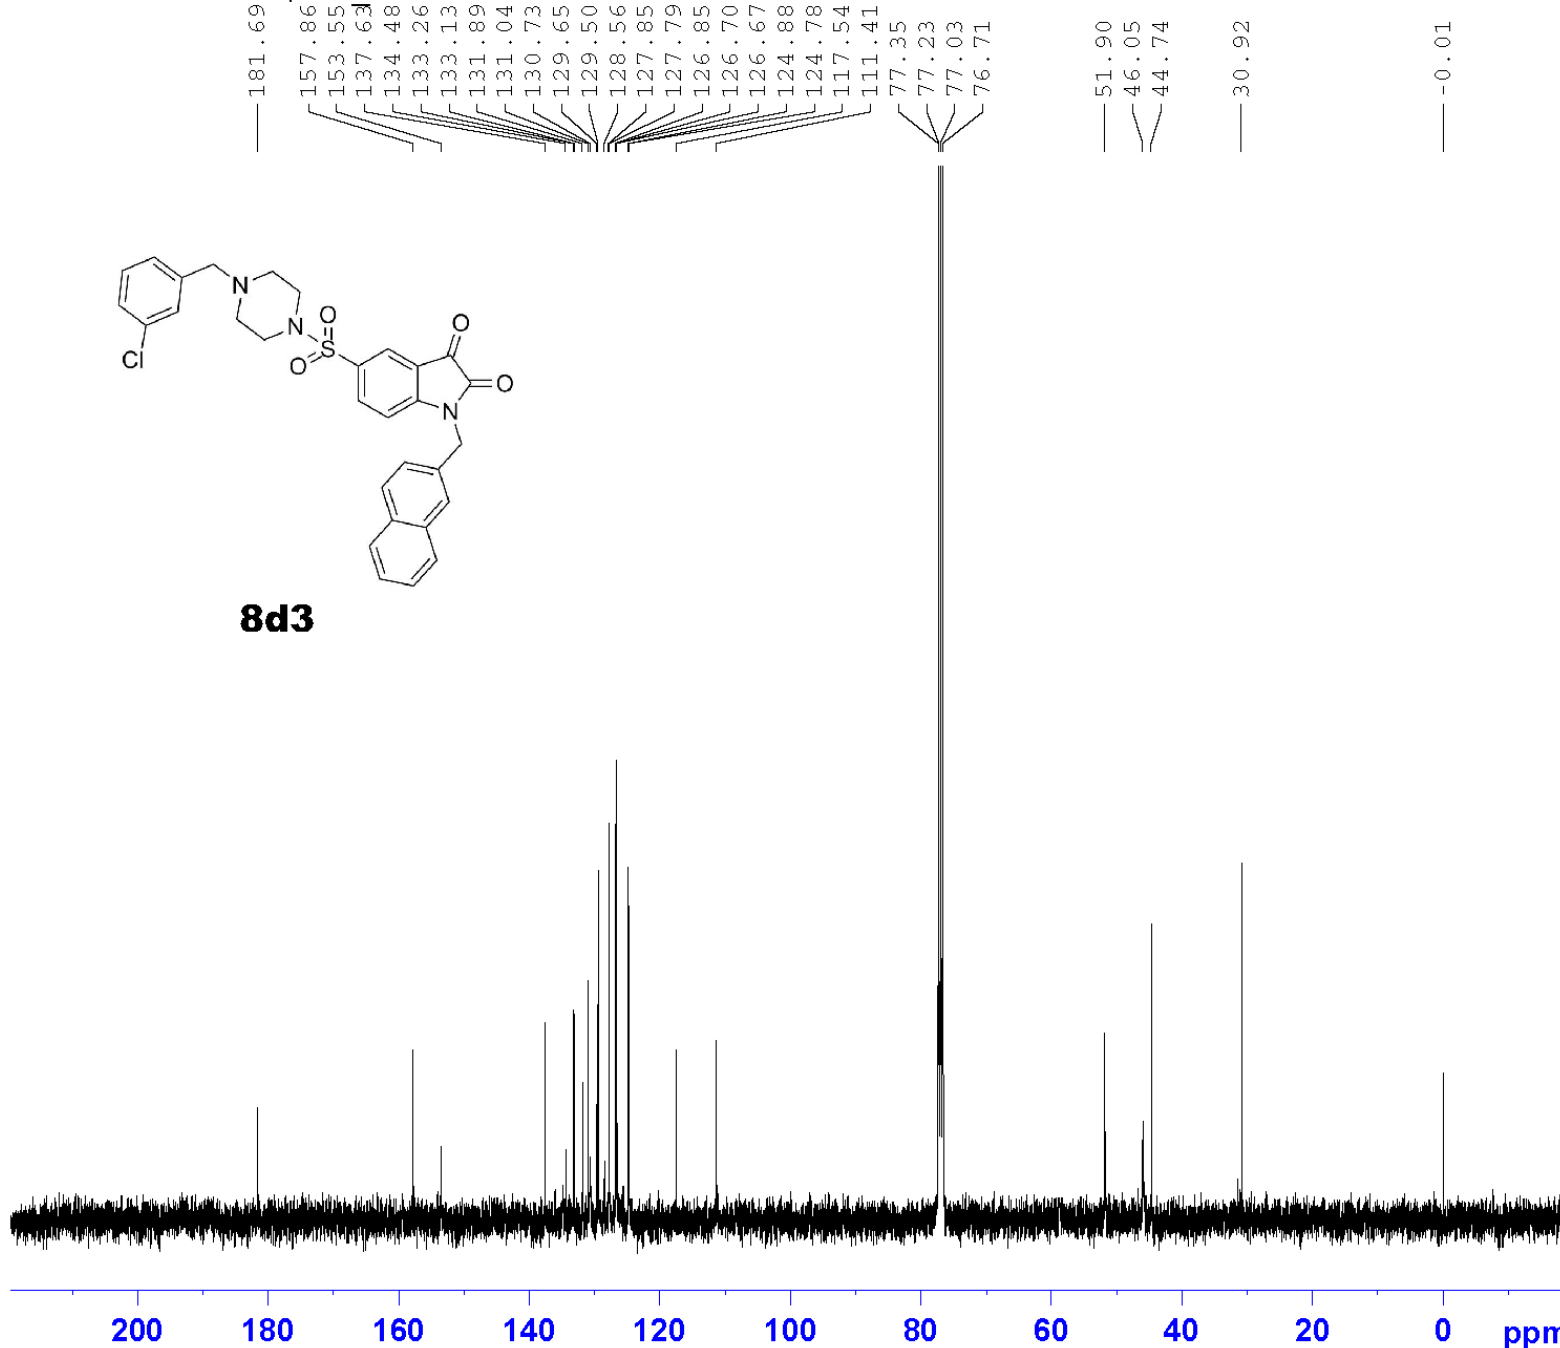

Current Data Parameters  
NAME ZHM-3ClBIANNAI  
EXPNO 10  
PROCNO 1

F2 - Acquisition Parameters  
Date\_ 20121121  
Time 20.06  
INSTRUM spect  
PROBHD 5 mm PABBO BB-  
PULPROG zgpg30  
TD 65536  
SOLVENT CDCl3  
NS 1024  
DS 4  
SWH 24038.461 Hz  
FIDRES 0.366798 Hz  
AQ 1.3631988 sec  
RG 203  
DW 20.800 usec  
DE 6.50 usec  
TE 299.8 K  
D1 2.00000000 sec  
D11 0.03000000 sec

==== CHANNEL f1 =====  
NUC1 13C  
P1 9.65 usec  
PLW1 49.65900040 W  
SFO1 100.6228293 MHz

==== CHANNEL f2 =====  
CPDPRG2 waltz16  
NUC2 1H  
PCPD2 90.00 usec  
PLW2 12.85299969 W  
PLW12 0.34196001 W  
PLW13 0.27699000 W  
SFO2 400.1316005 MHz

F2 - Processing parameters  
SI 32768  
SF 100.6127690 MHz  
WDW EM  
SSB 0  
LB 1.00 Hz  
GB 0  
PC 1.40

S20121115-051

20121115

C13CPD CDC13 D:\nmr\_data ham

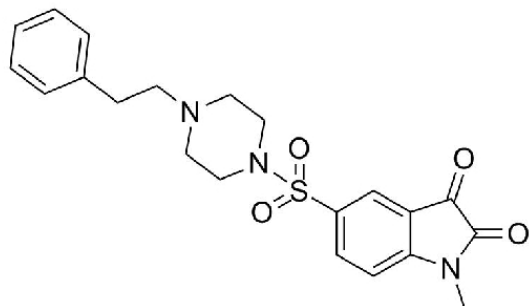

8f1

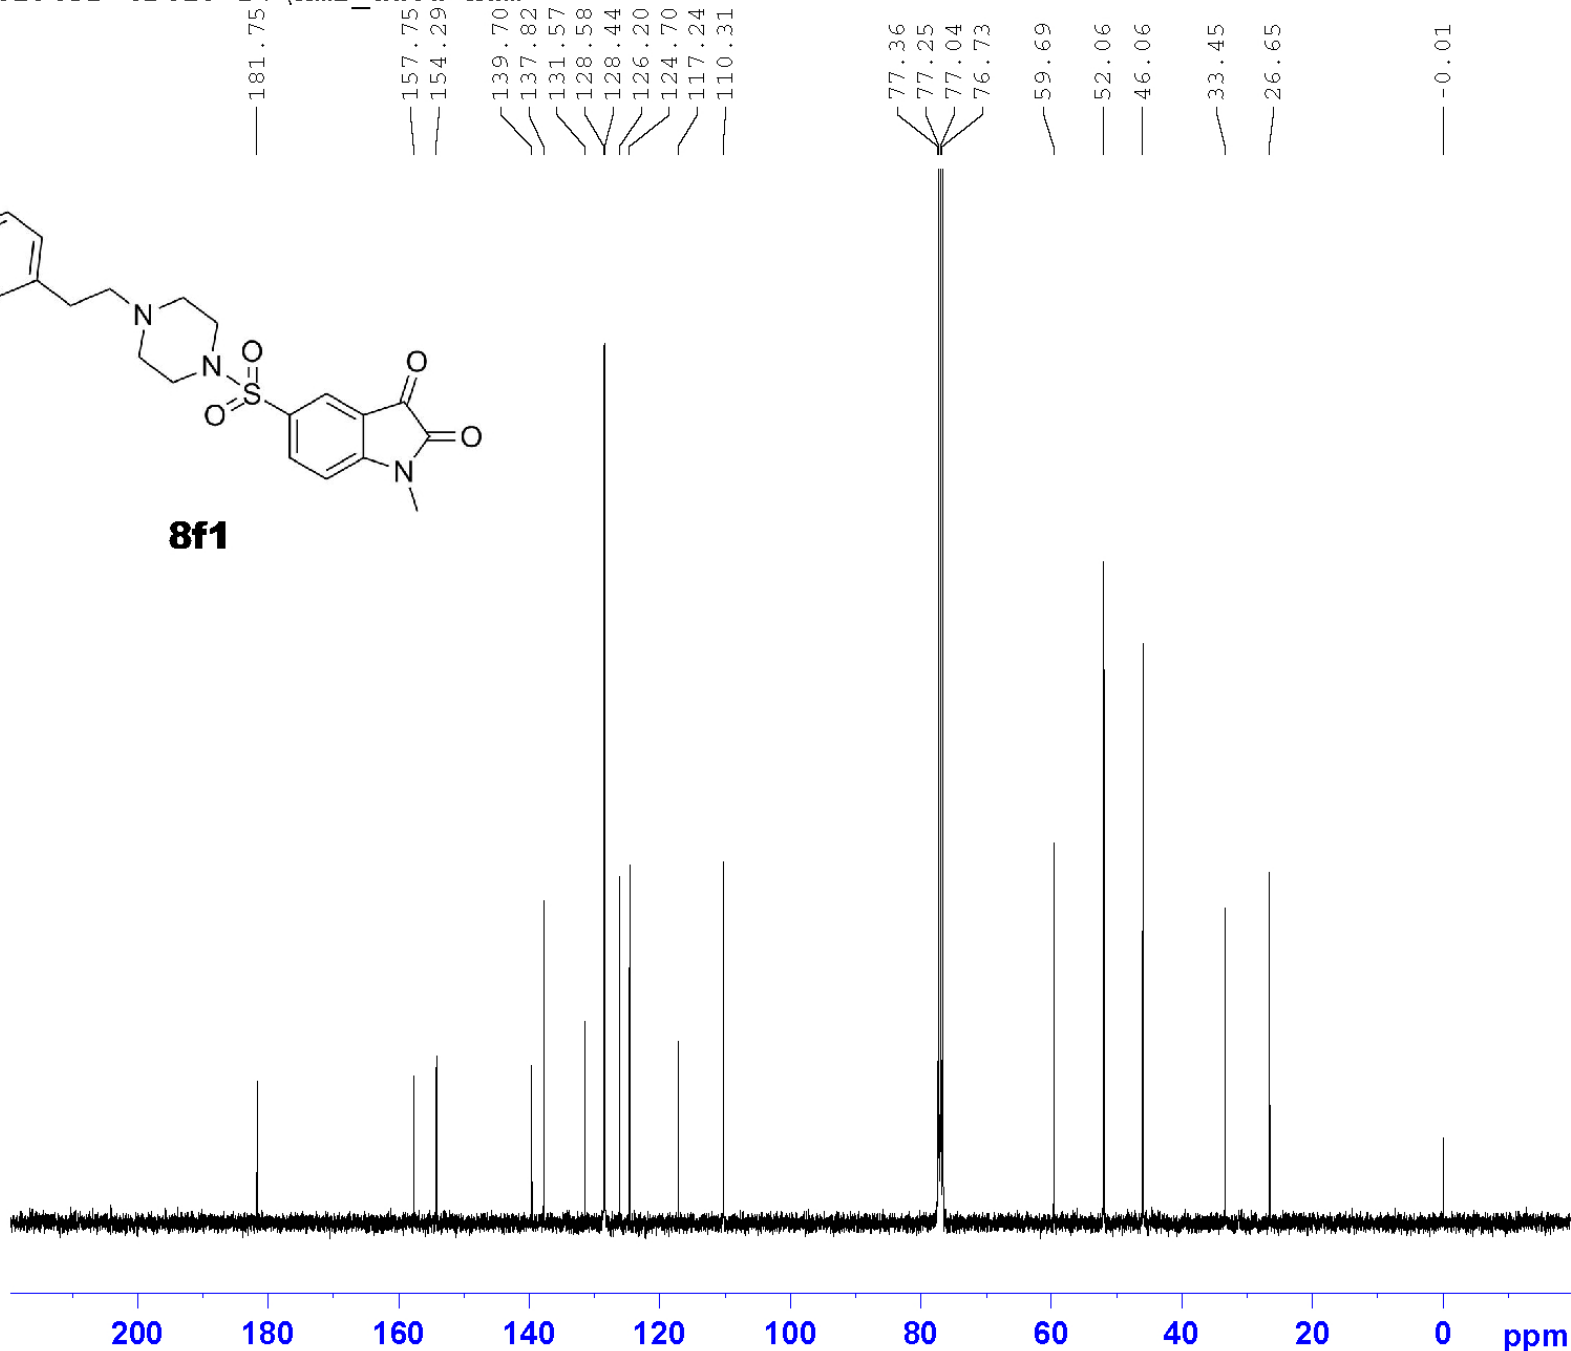

Current Data Parameters  
NAME ZHM-BENYIJIA  
EXPNO 10  
PROCNO 1

F2 - Acquisition Parameters  
Date\_ 20121122  
Time 0.16  
INSTRUM spect  
PROBHD 5 mm PABBO BB-  
PULPROG zgpg30  
TD 65536  
SOLVENT CDC13  
NS 1024  
DS 4  
SWH 24038.461 Hz  
FIDRES 0.366798 Hz  
AQ 1.3631988 sec  
RG 203  
DW 20.800 usec  
DE 6.50 usec  
TE 299.7 K  
D1 2.00000000 sec  
D11 0.03000000 sec

==== CHANNEL f1 =====  
NUC1 13C  
P1 9.65 usec  
PLW1 49.65900040 W  
SFO1 100.6228293 MHz

==== CHANNEL f2 =====  
CPDPRG2 waltz16  
NUC2 1H  
PCPD2 90.00 usec  
PLW2 12.85299969 W  
PLW12 0.34196001 W  
PLW13 0.27699000 W  
SFO2 400.1316005 MHz

F2 - Processing parameters  
SI 32768  
SF 100.6127690 MHz  
WDW EM  
SSB 0  
LB 1.00 Hz  
GB 0  
PC 1.40

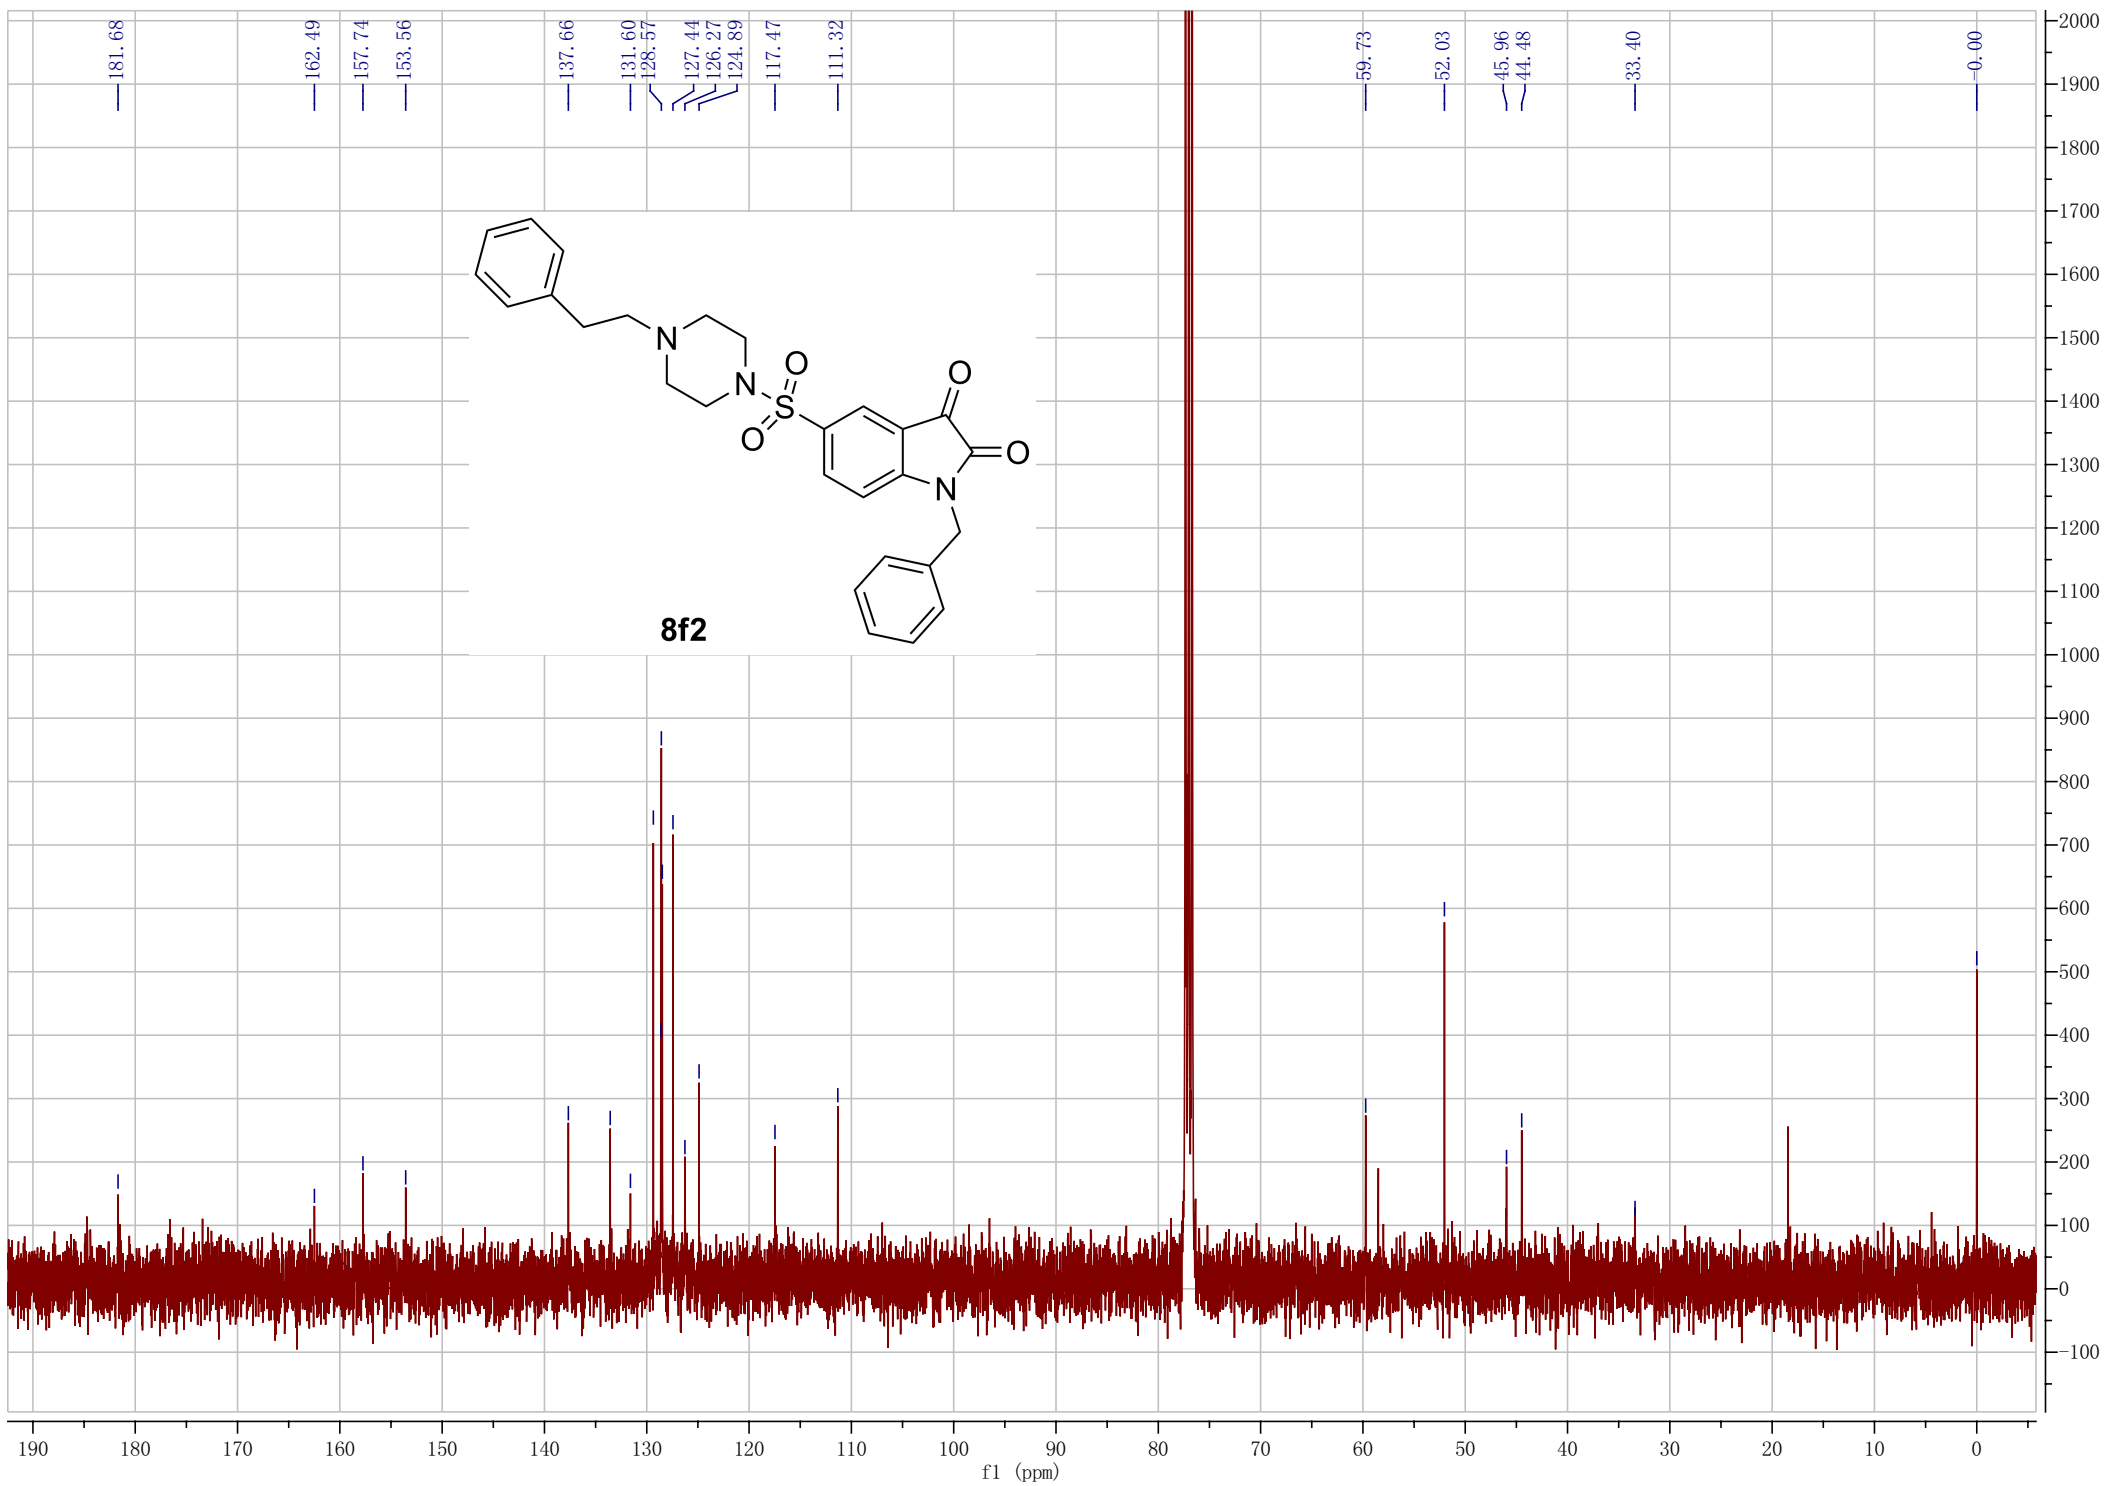

S20130225-058  
13C CDCL3  
20130227



181.73  
157.84  
137.74  
133.26  
133.16  
131.46  
130.95  
129.60  
128.59  
128.51  
127.89  
127.84  
126.89  
126.70  
126.65  
126.26  
124.92  
124.80  
117.50  
111.48

77.27  
77.05  
76.84

59.75  
51.98  
46.01  
44.75

0.04

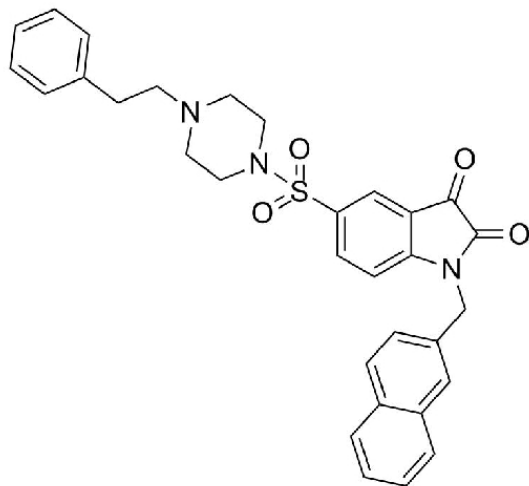

8f3

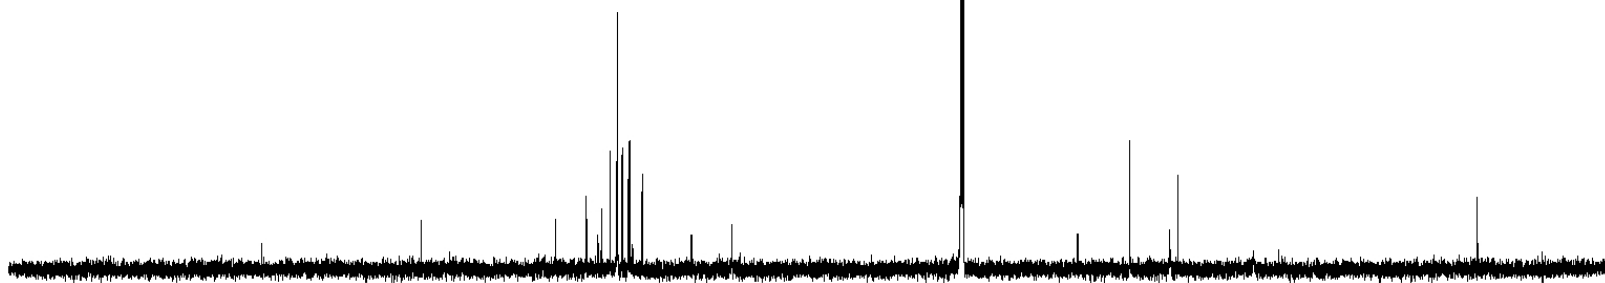

Current Data Parameters  
NAME ZHM-BenYiNai  
EXPNO 20  
PROCNO 1

F2 - Acquisition Parameters  
Date\_ 20130227  
Time 16.42  
INSTRUM spect  
PROBHD 5 mm PABBO BB-  
PULPROG zgpg30  
TD 65536  
SOLVENT CDCL3  
NS 1024  
DS 4  
SWH 36057.691 Hz  
FIDRES 0.550197 Hz  
AQ 0.9088159 sec  
RG 203  
DW 13.867 usec  
DE 6.50 usec  
TE 292.5 K  
D1 2.0000000 sec  
D11 0.0300000 sec

==== CHANNEL f1 =====  
NUC1 13C  
P1 15.08 usec  
PLW1 100.0000000 W  
SFO1 150.9430456 MHz

==== CHANNEL f2 =====  
CPDPRG2 waltz16  
NUC2 1H  
PCPD2 70.00 usec  
PLW2 17.78300095 W  
PLW12 0.65262997 W  
PLW13 0.65262997 W  
SFO2 600.2324009 MHz

F2 - Processing parameters  
SI 32768  
SF 150.9279540 MHz  
WDW EM  
SSB 0  
LB 1.00 Hz  
GB 0  
PC 1.40

200 180 160 140 120 100 80 60 40 20 0 ppm

S20130320-002  
13C DMSO  
20130325



182.26

158.91

158.64

154.90

148.02

138.21

137.44

129.47

123.20

118.43

113.99

111.66

107.92

46.01

44.40

40.55

40.43

40.29

40.15

40.01

39.87

39.73

39.59

26.80

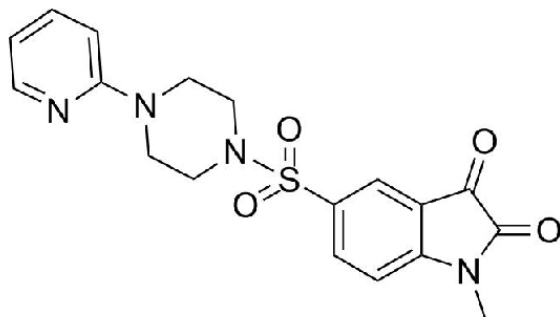

8h1

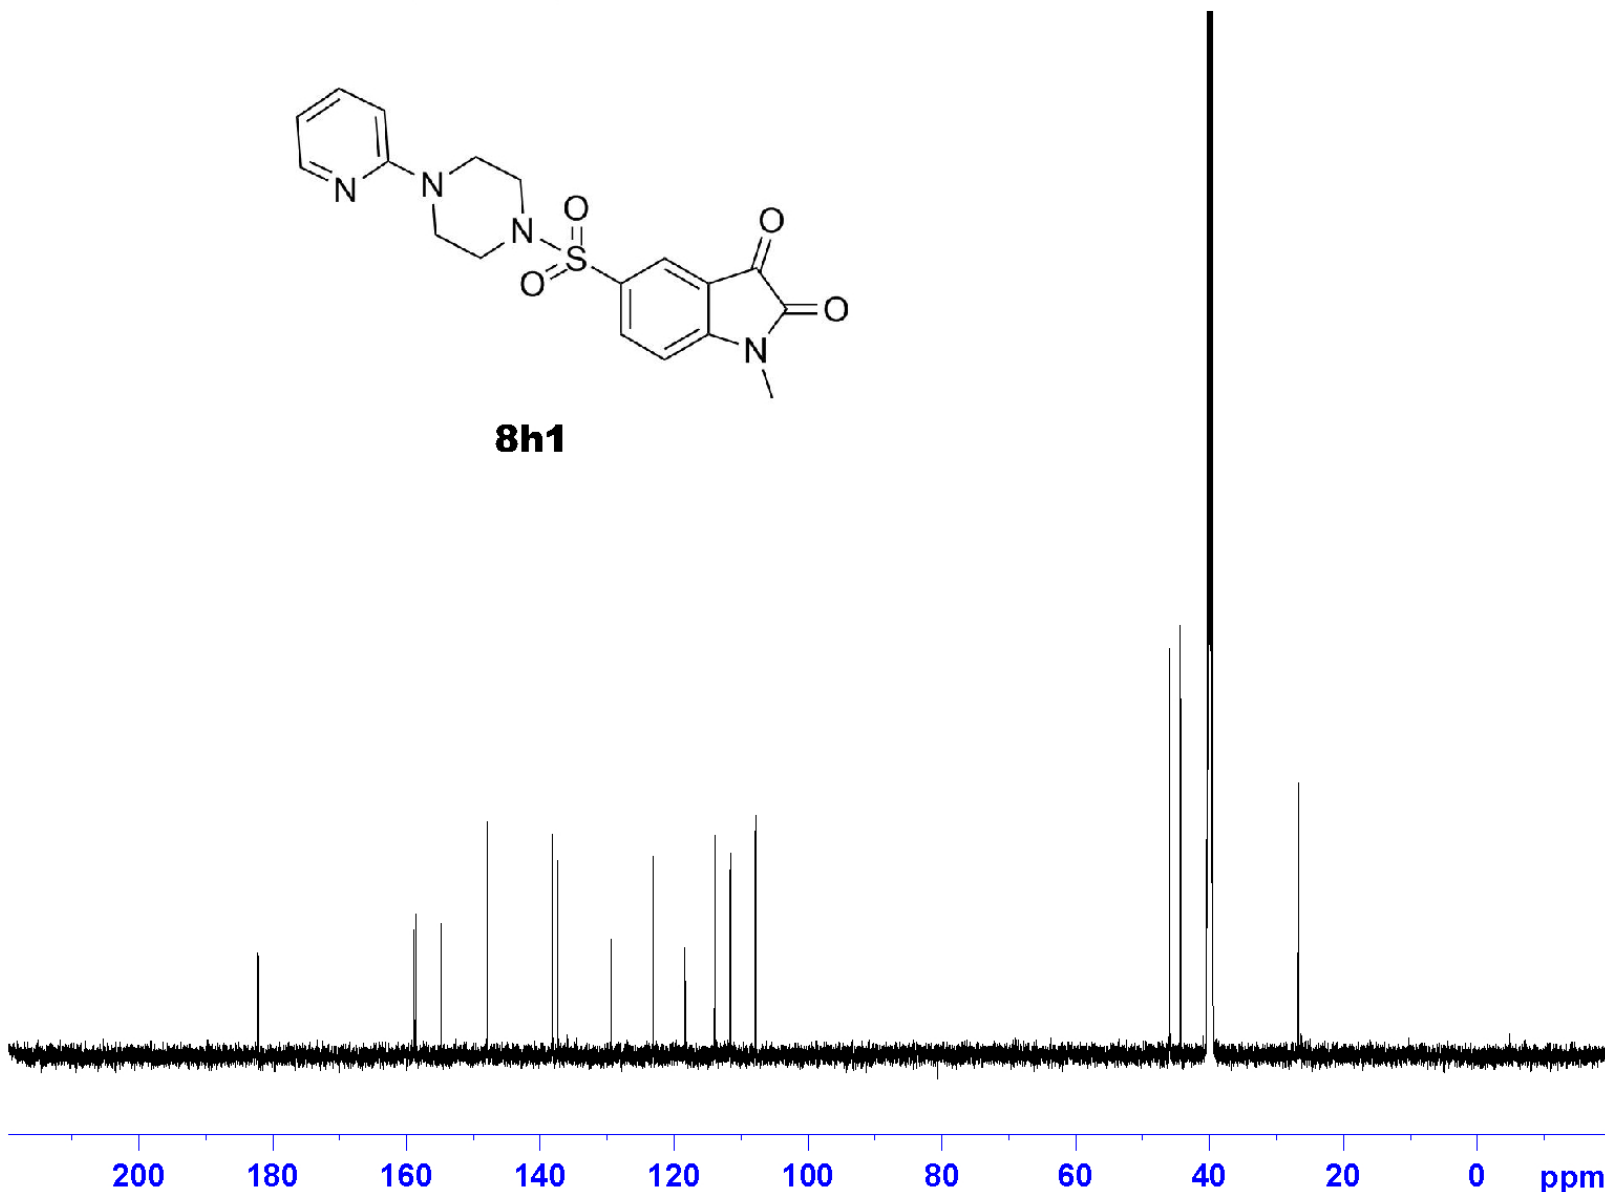

Current Data Parameters  
NAME ZHM-BiJia  
EXPNO 2  
PROCNO 1

F2 - Acquisition Parameters  
Date\_ 20130325  
Time 10.39  
INSTRUM spect  
PROBHD 5 mm PABBO BB-  
PULPROG zgpg30  
TD 65536  
SOLVENT DMSO  
NS 2048  
DS 4  
SWH 36057.691 Hz  
FIDRES 0.550197 Hz  
AQ 0.9088159 sec  
RG 203  
DW 13.867 usec  
DE 6.50 usec  
TE 298.0 K  
D1 2.0000000 sec  
D11 0.0300000 sec

==== CHANNEL f1 =====  
NUC1 13C  
P1 15.08 usec  
PLW1 100.0000000 W  
SFO1 150.9430456 MHz

==== CHANNEL f2 =====  
CPDPRG2 waltz16  
NUC2 1H  
PCPD2 70.00 usec  
PLW2 17.78300095 W  
PLW12 0.65262997 W  
PLW13 0.65262997 W  
SFO2 600.2324009 MHz

F2 - Processing parameters  
SI 32768  
SF 150.9279540 MHz  
WDW EM  
SSB 0  
LB 1.00 Hz  
GB 0  
PC 1.40

S20130114-020

20130114

C13CPD CDCl3 D:\nmr\_data ham

181.63  
157.71  
153.64  
147.97  
137.80  
137.63  
133.58  
131.71  
129.32  
128.61  
127.48  
124.79  
117.53  
114.17  
111.37  
107.30

77.33  
77.22  
77.02  
76.70

45.73  
44.71  
44.50

-0.01

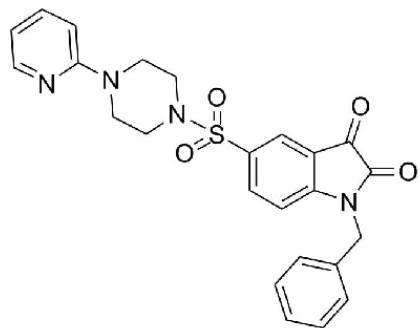

8h2

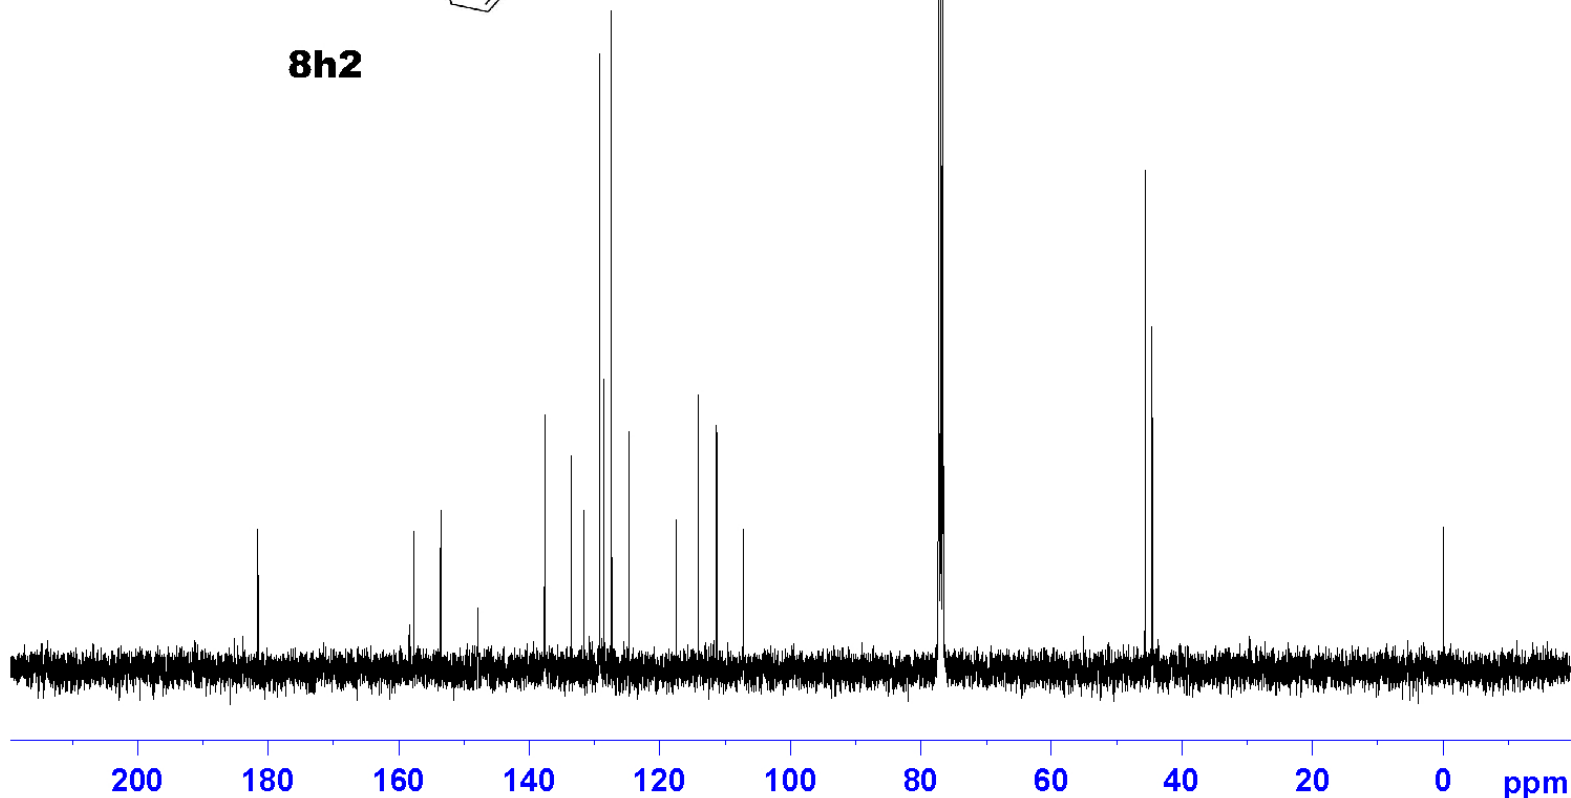

Current Data Parameters  
NAME ZHM-BIBIAN  
EXPNO 10  
PROCNO 1

F2 - Acquisition Parameters  
Date\_ 20130115  
Time 0.30  
INSTRUM spect  
PROBHD 5 mm PABBO BB-  
PULPROG zgpg30  
TD 65536  
SOLVENT CDCl3  
NS 1024  
DS 4  
SWH 24038.461 Hz  
FIDRES 0.366798 Hz  
AQ 1.3631988 sec  
RG 203  
DW 20.800 usec  
DE 6.50 usec  
TE 299.7 K  
D1 2.00000000 sec  
D11 0.03000000 sec

==== CHANNEL f1 =====  
NUC1 13C  
P1 9.65 usec  
PLW1 49.65900040 W  
SFO1 100.6228293 MHz

==== CHANNEL f2 =====  
CPDPRG2 waltz16  
NUC2 1H  
PCPD2 90.00 usec  
PLW2 12.85299969 W  
PLW12 0.34196001 W  
PLW13 0.27699000 W  
SFO2 400.1316005 MHz

F2 - Processing parameters  
SI 32768  
SF 100.6127690 MHz  
WDW EM  
SSB 0  
LB 1.00 Hz  
GB 0  
PC 1.40

S20130320-003  
13C DMSO  
20130325

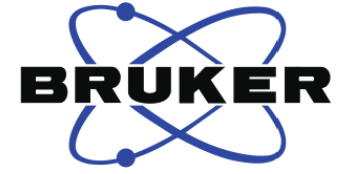

181.91  
159.17  
158.66  
153.93  
148.00  
138.18  
137.26  
133.34  
133.03  
132.86  
129.79  
129.38  
128.80  
128.68  
128.06  
126.85  
126.54  
126.26  
125.98  
125.79  
123.40  
118.99  
113.99  
112.03  
107.91

45.99  
44.38  
43.92  
40.55  
40.43  
40.29  
40.15  
40.01  
39.87  
39.73  
39.60

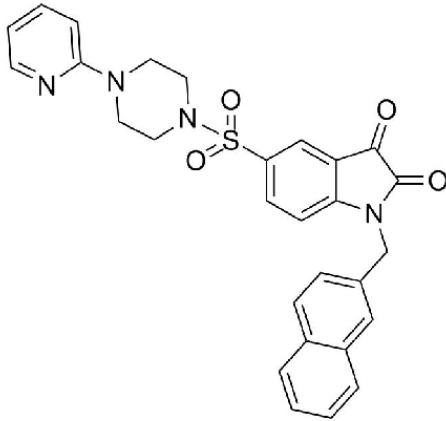

8h3

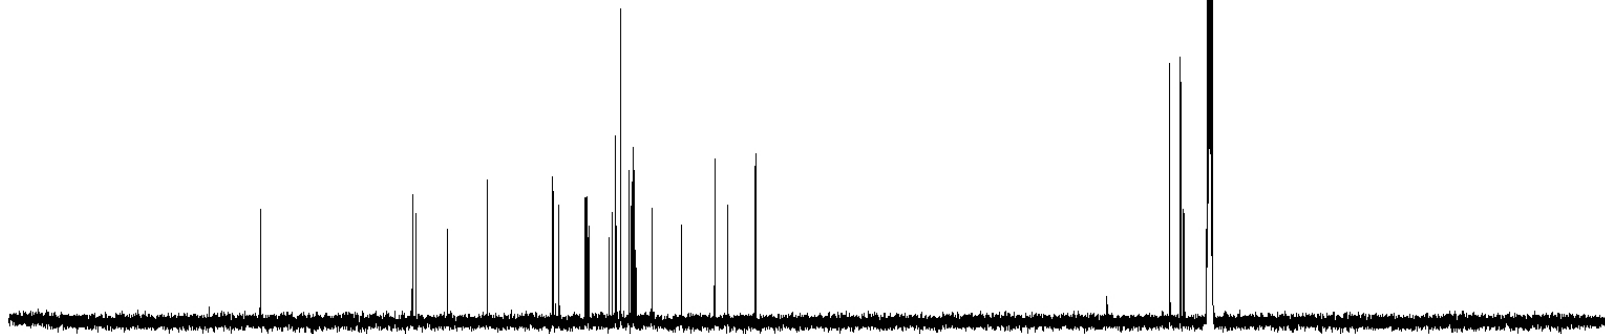

Current Data Parameters  
NAME ZHM-BiBian  
EXPNO 2  
PROCNO 1

F2 - Acquisition Parameters  
Date\_ 20130325  
Time 12.22  
INSTRUM spect  
PROBHD 5 mm PABBO BB-  
PULPROG zgpg30  
TD 65536  
SOLVENT DMSO  
NS 1024  
DS 4  
SWH 36057.691 Hz  
FIDRES 0.550197 Hz  
AQ 0.9088159 sec  
RG 203  
DW 13.867 usec  
DE 6.50 usec  
TE 298.0 K  
D1 2.0000000 sec  
D11 0.0300000 sec

==== CHANNEL f1 =====  
NUC1 13C  
P1 15.08 usec  
PLW1 100.0000000 W  
SFO1 150.9430456 MHz

==== CHANNEL f2 =====  
CPDPRG2 waltz16  
NUC2 1H  
PCPD2 70.00 usec  
PLW2 17.78300095 W  
PLW12 0.65262997 W  
PLW13 0.65262997 W  
SFO2 600.2324009 MHz

F2 - Processing parameters  
SI 32768  
SF 150.9279540 MHz  
WDW EM  
SSB 0  
LB 1.00 Hz  
GB 0  
PC 1.40

200 180 160 140 120 100 80 60 40 20 0 ppm

S20120702-026

20120702

C13CPD CDCl3 D:\nmr\_data ham

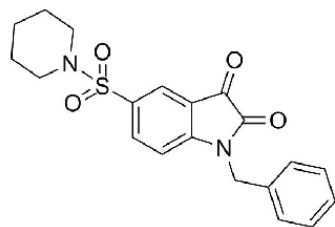

8i2

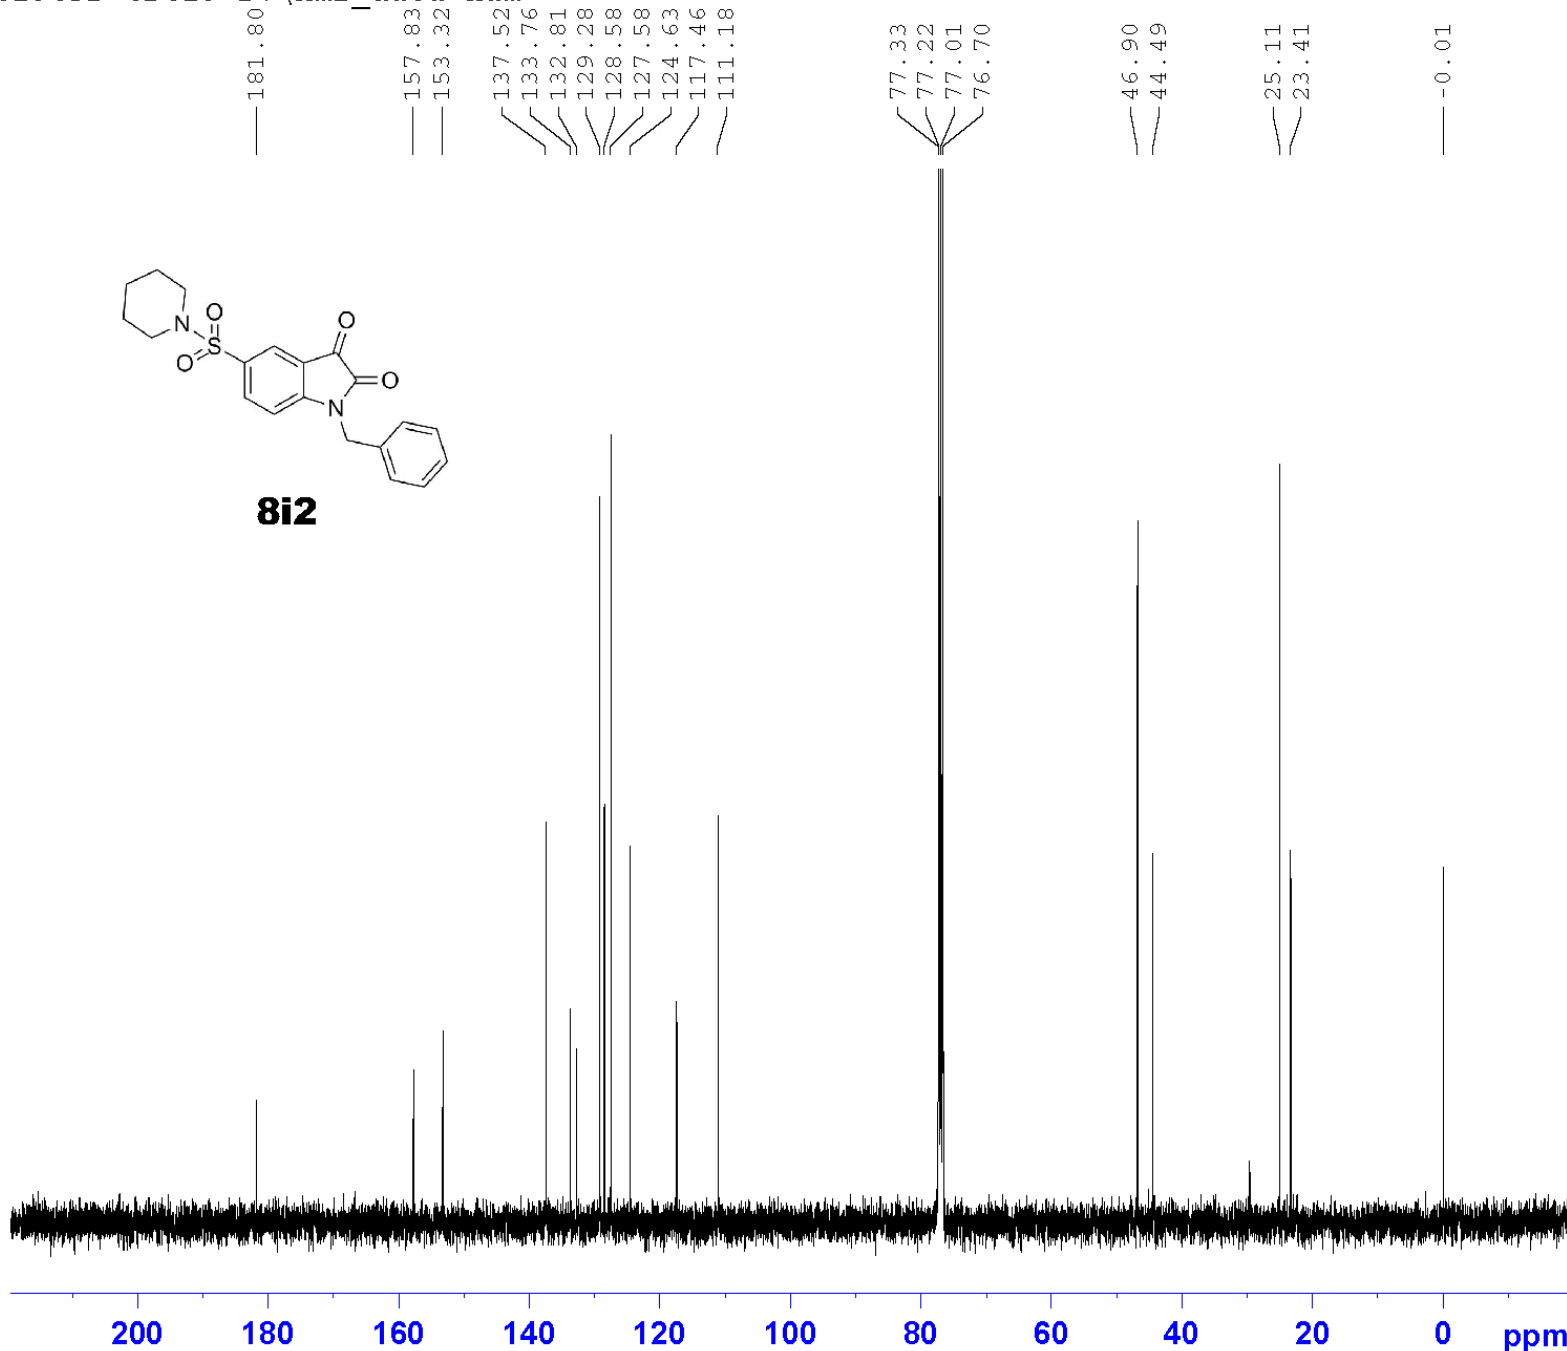

Current Data Parameters  
NAME ZHM-PAIDINGBIAN  
EXPNO 10  
PROCNO 1

F2 - Acquisition Parameters  
Date\_ 20120702  
Time 21.20  
INSTRUM spect  
PROBHD 5 mm PABBO BB-  
PULPROG zgpg30  
TD 65536  
SOLVENT CDCl3  
NS 1024  
DS 4  
SWH 24038.461 Hz  
FIDRES 0.366798 Hz  
AQ 1.3631988 sec  
RG 203  
DW 20.800 usec  
DE 6.50 usec  
TE 299.6 K  
D1 2.00000000 sec  
D11 0.03000000 sec

==== CHANNEL f1 =====  
NUC1 13C  
P1 9.65 usec  
PLW1 49.65900040 W  
SFO1 100.6228293 MHz

==== CHANNEL f2 =====  
CPDPRG2 waltz16  
NUC2 1H  
PCPD2 90.00 usec  
PLW2 12.85299969 W  
PLW12 0.34196001 W  
PLW13 0.27699000 W  
SFO2 400.1316005 MHz

F2 - Processing parameters  
SI 32768  
SF 100.6127690 MHz  
WDW EM  
SSB 0  
LB 1.00 Hz  
GB 0  
PC 1.40



S20120702-025

20120702

C13CPD CDC13 D:\nmr\_data ham

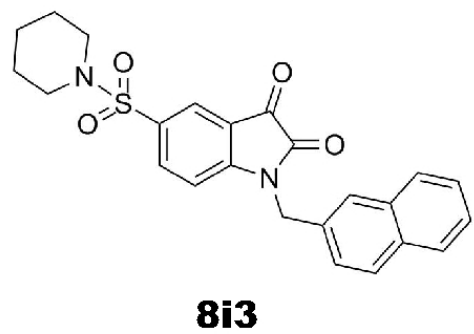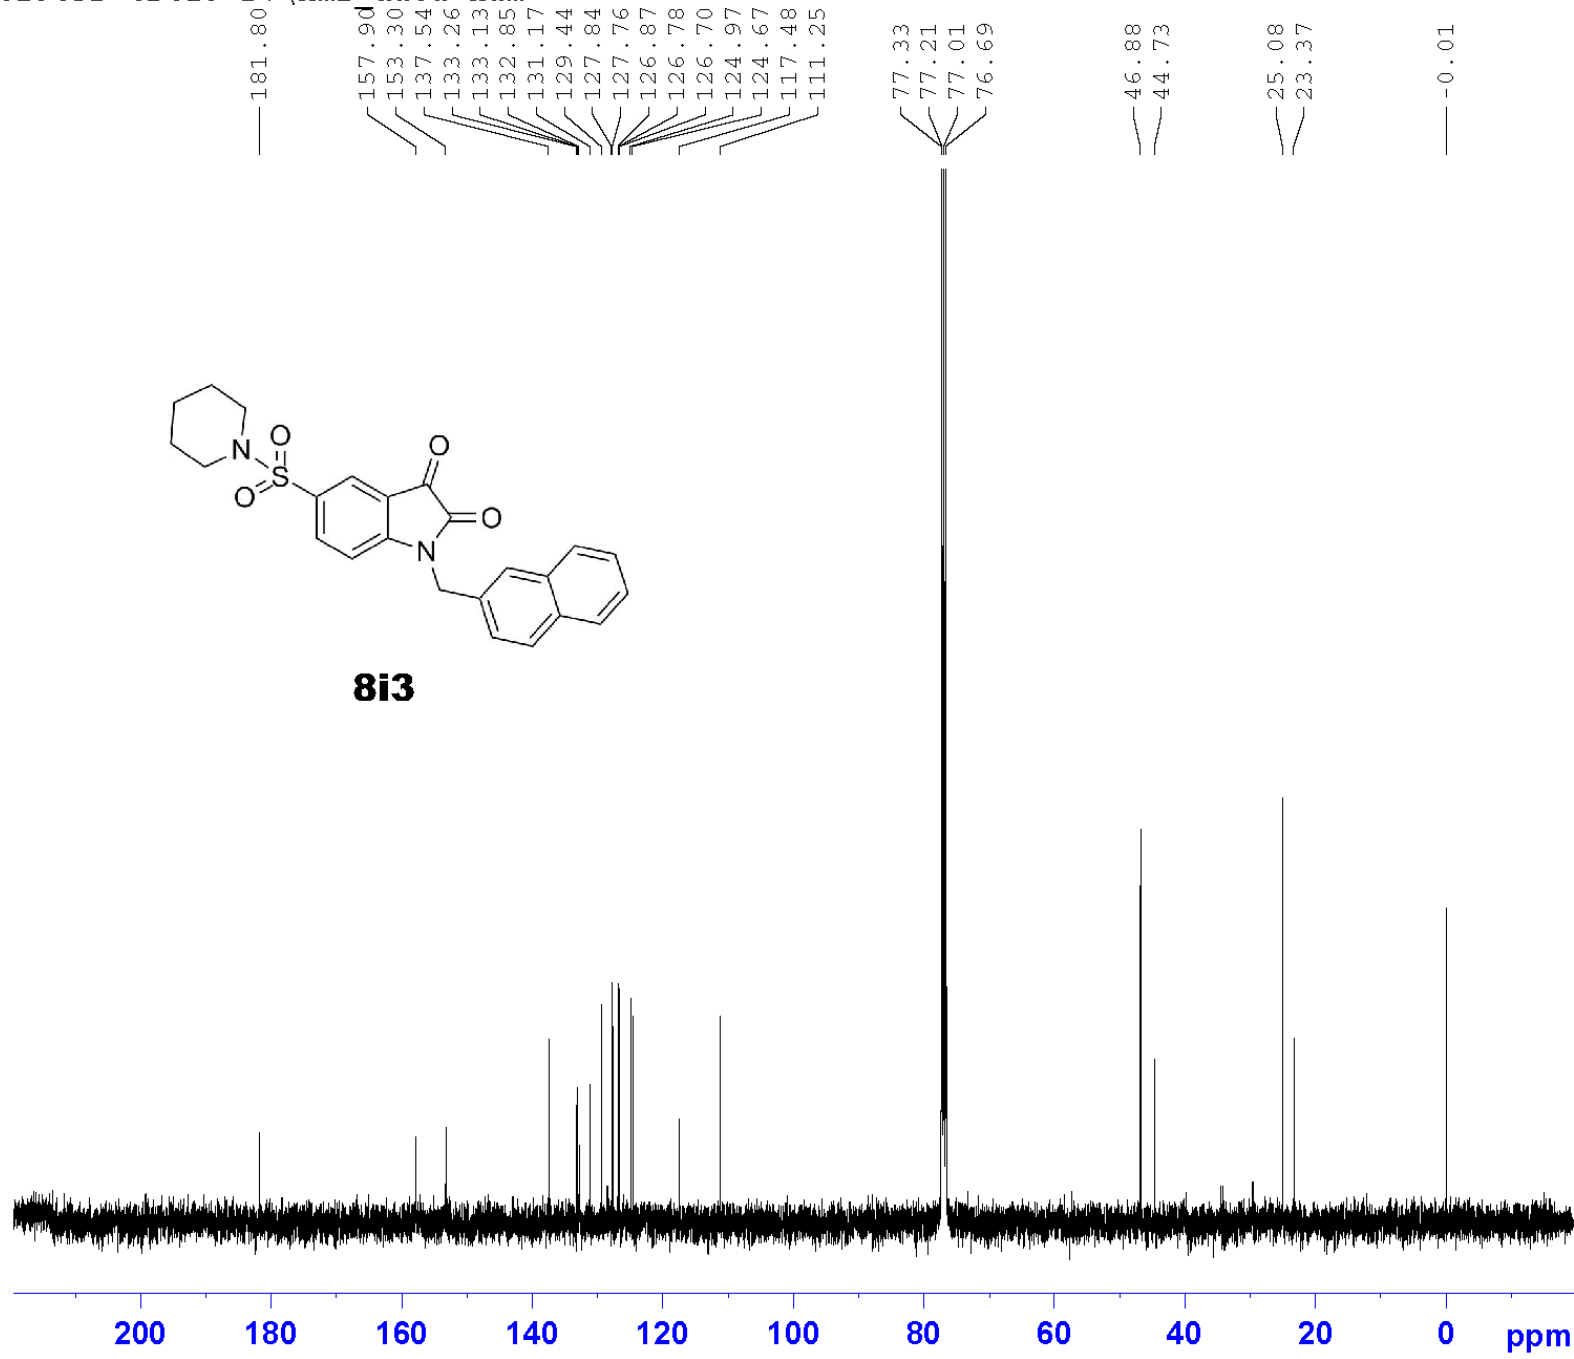

Current Data Parameters  
NAME ZHM-PAIDINGNAI  
EXPNO 10  
PROCNO 1

F2 - Acquisition Parameters  
Date\_ 20120702  
Time 20.18  
INSTRUM spect  
PROBHD 5 mm PABBO BB-  
PULPROG zgpg30  
TD 65536  
SOLVENT CDC13  
NS 1024  
DS 4  
SWH 24038.461 Hz  
FIDRES 0.366798 Hz  
AQ 1.3631988 sec  
RG 203  
DW 20.800 usec  
DE 6.50 usec  
TE 299.9 K  
D1 2.00000000 sec  
D11 0.03000000 sec

==== CHANNEL f1 =====  
NUC1 13C  
P1 9.65 usec  
PLW1 49.65900040 W  
SFO1 100.6228293 MHz

==== CHANNEL f2 =====  
CPDPRG2 waltz16  
NUC2 1H  
PCPD2 90.00 usec  
PLW2 12.85299969 W  
PLW12 0.34196001 W  
PLW13 0.27699000 W  
SFO2 400.1316005 MHz

F2 - Processing parameters  
SI 32768  
SF 100.6127690 MHz  
WDW EM  
SSB 0  
LB 1.00 Hz  
GB 0  
PC 1.40

S20121127-049

20121127

C13CPD DMSO D:\nmr\_data ham

— 182.27  
— 158.93  
— 154.95  
— 137.50  
— 129.15  
— 123.26  
— 118.42  
— 111.67

— 65.68  
— 46.37  
— 40.62  
— 40.41  
— 40.20  
— 39.99  
— 39.78  
— 39.57  
— 39.36  
— 26.83

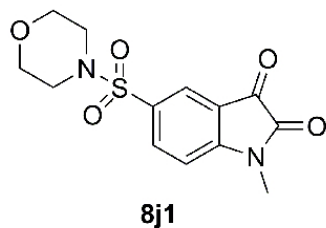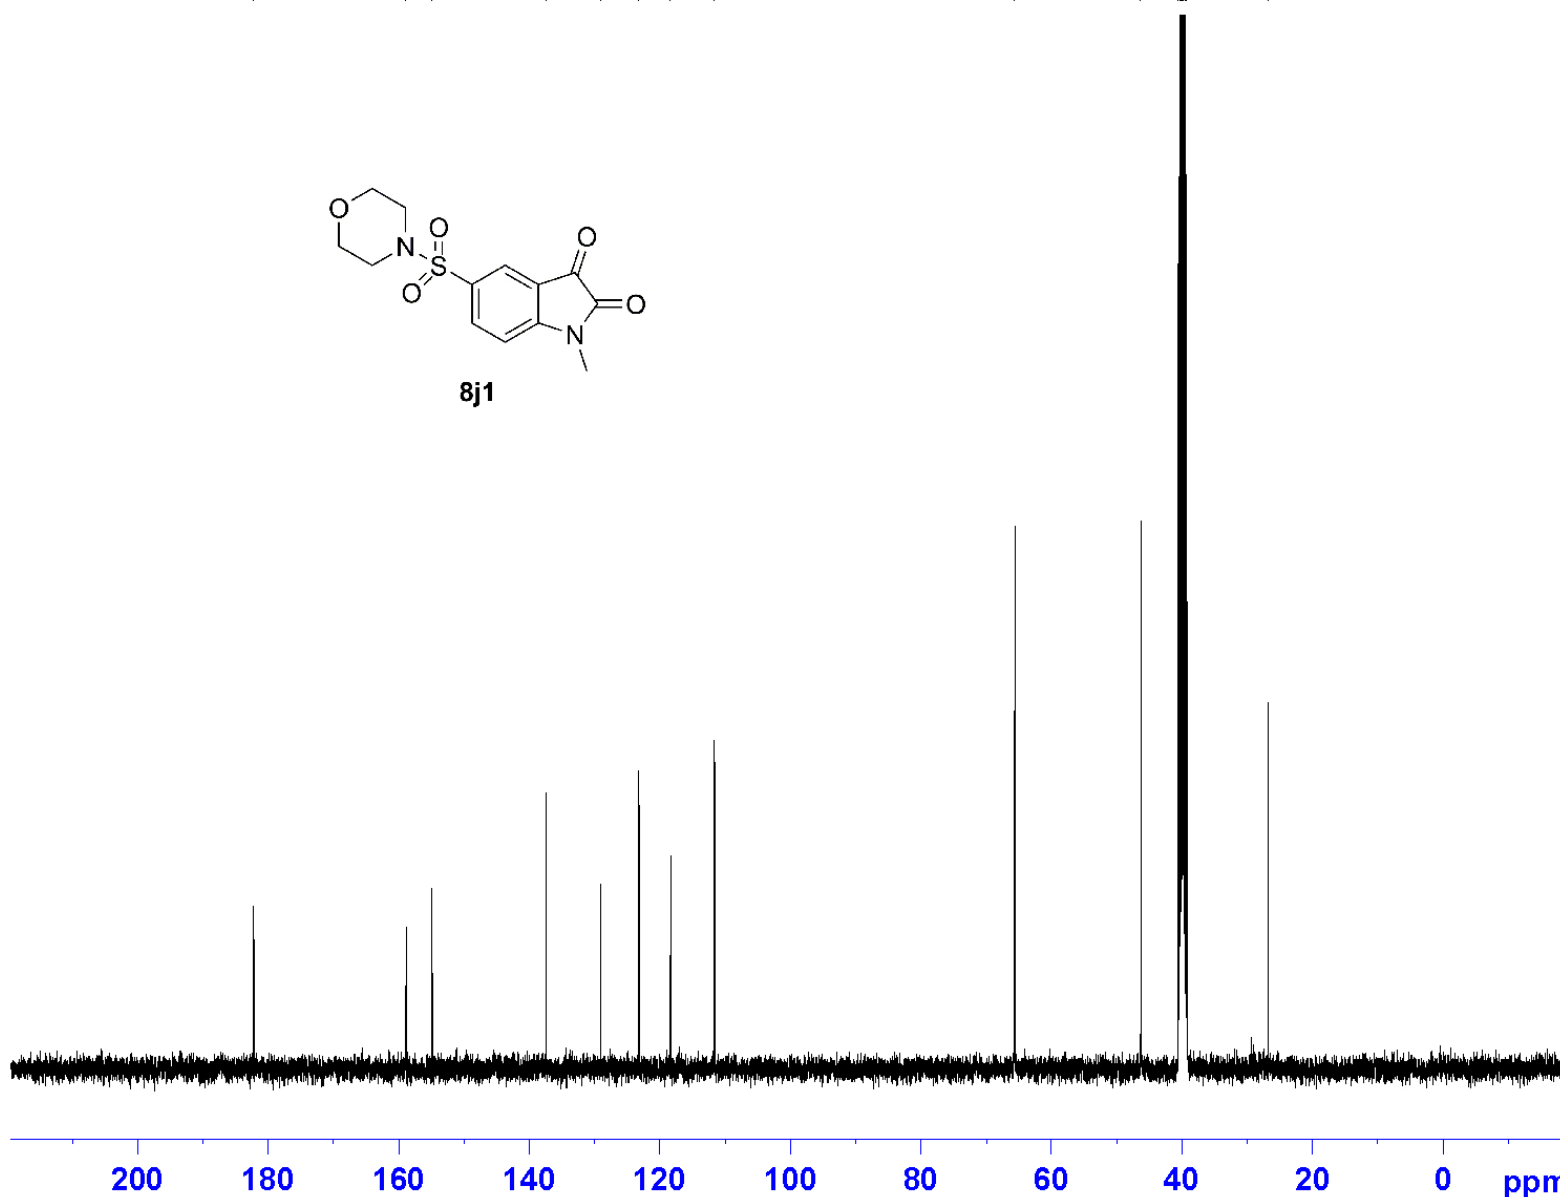

Current Data Parameters  
NAME ZHM-MAJIA  
EXPNO 10  
PROCNO 1

F2 - Acquisition Parameters  
Date\_ 20121127  
Time 22.34  
INSTRUM spect  
PROBHD 5 mm PABBO BB-  
PULPROG zgpg30  
TD 65536  
SOLVENT DMSO  
NS 1024  
DS 4  
SWH 24038.461 Hz  
FIDRES 0.366798 Hz  
AQ 1.3631988 sec  
RG 203  
DW 20.800 usec  
DE 6.50 usec  
TE 298.0 K  
D1 2.00000000 sec  
D11 0.03000000 sec

==== CHANNEL f1 =====  
NUC1 13C  
P1 9.65 usec  
PLW1 49.65900040 W  
SFO1 100.6228293 MHz

==== CHANNEL f2 =====  
CPDPRG2 waltz16  
NUC2 1H  
PCPD2 90.00 usec  
PLW2 12.85299969 W  
PLW12 0.34196001 W  
PLW13 0.27699000 W  
SFO2 400.1316005 MHz

F2 - Processing parameters  
SI 32768  
SF 100.6127690 MHz  
WDW EM  
SSB 0  
LB 1.00 Hz  
GB 0  
PC 1.40

S20121025-060

20121025

C13CPD CDCl3 D:\nmr\_data ham



Current Data Parameters  
NAME ZHM-MABIAN  
EXPNO 10  
PROCNO 1

F2 - Acquisition Parameters  
Date\_ 20121026  
Time 9.11  
INSTRUM spect  
PROBHD 5 mm PABBO BB-  
PULPROG zgpg30  
TD 65536  
SOLVENT CDCl3  
NS 1024  
DS 4  
SWH 24038.461 Hz  
FIDRES 0.366798 Hz  
AQ 1.3631988 sec  
RG 203  
DW 20.800 usec  
DE 6.50 usec  
TE 298.0 K  
D1 2.00000000 sec  
D11 0.03000000 sec

==== CHANNEL f1 =====  
NUC1 13C  
P1 9.65 usec  
PLW1 49.65900040 W  
SFO1 100.6228293 MHz

==== CHANNEL f2 =====  
CPDPRG2 waltz16  
NUC2 1H  
PCPD2 90.00 usec  
PLW2 12.85299969 W  
PLW12 0.34196001 W  
PLW13 0.27699000 W  
SFO2 400.1316005 MHz

F2 - Processing parameters  
SI 32768  
SF 100.6127690 MHz  
WDW EM  
SSB 0  
LB 1.00 Hz  
GB 0  
PC 1.40

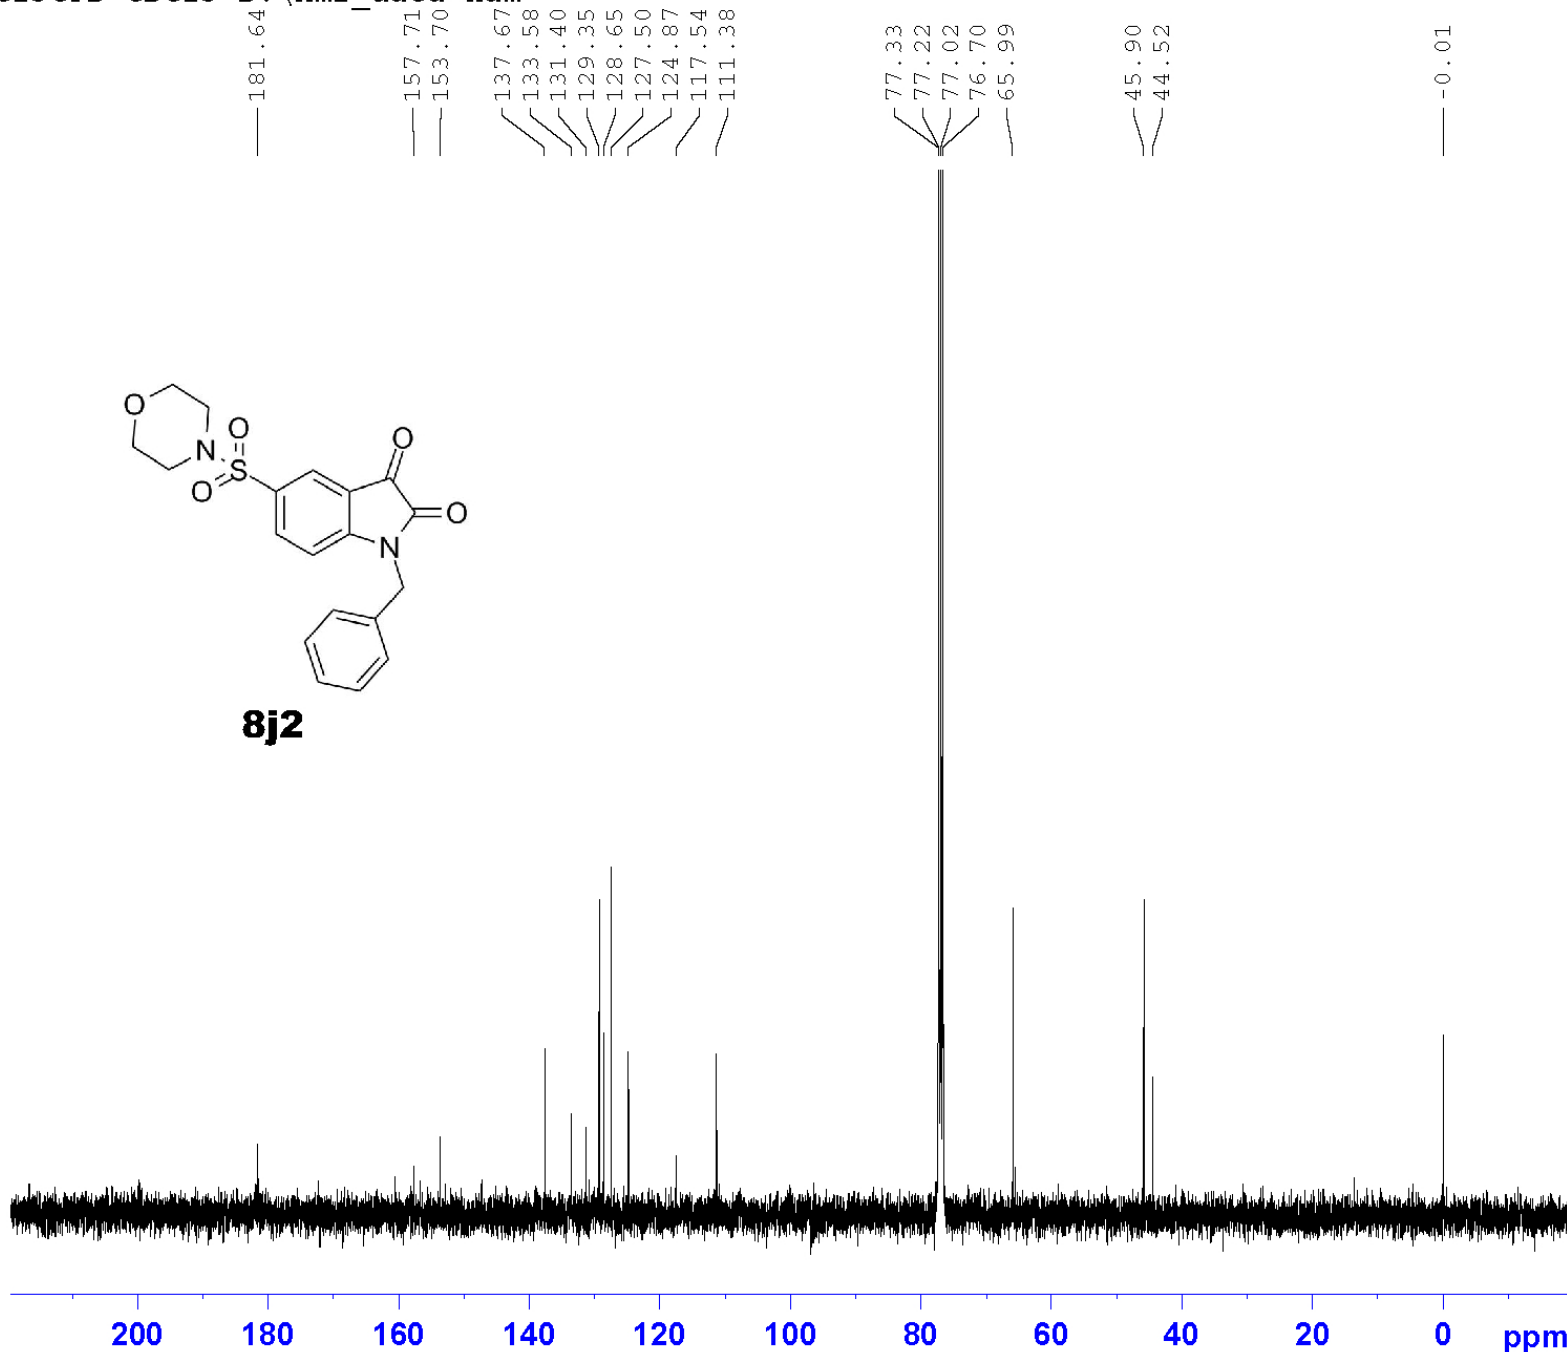

S20121025-047

20121025

C13CPD CDCl3 D:\nmr\_data ham

181.65  
157.80  
153.69  
137.69  
133.26  
133.15  
131.44  
130.97  
129.54  
127.87  
127.77  
126.91  
126.73  
124.87  
124.84  
117.57  
111.47  
77.33  
77.22  
77.01  
76.70  
65.96  
45.88  
44.78  
-0.01

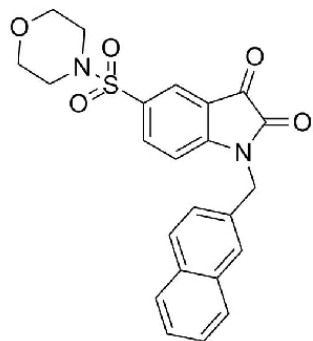

**8j3**

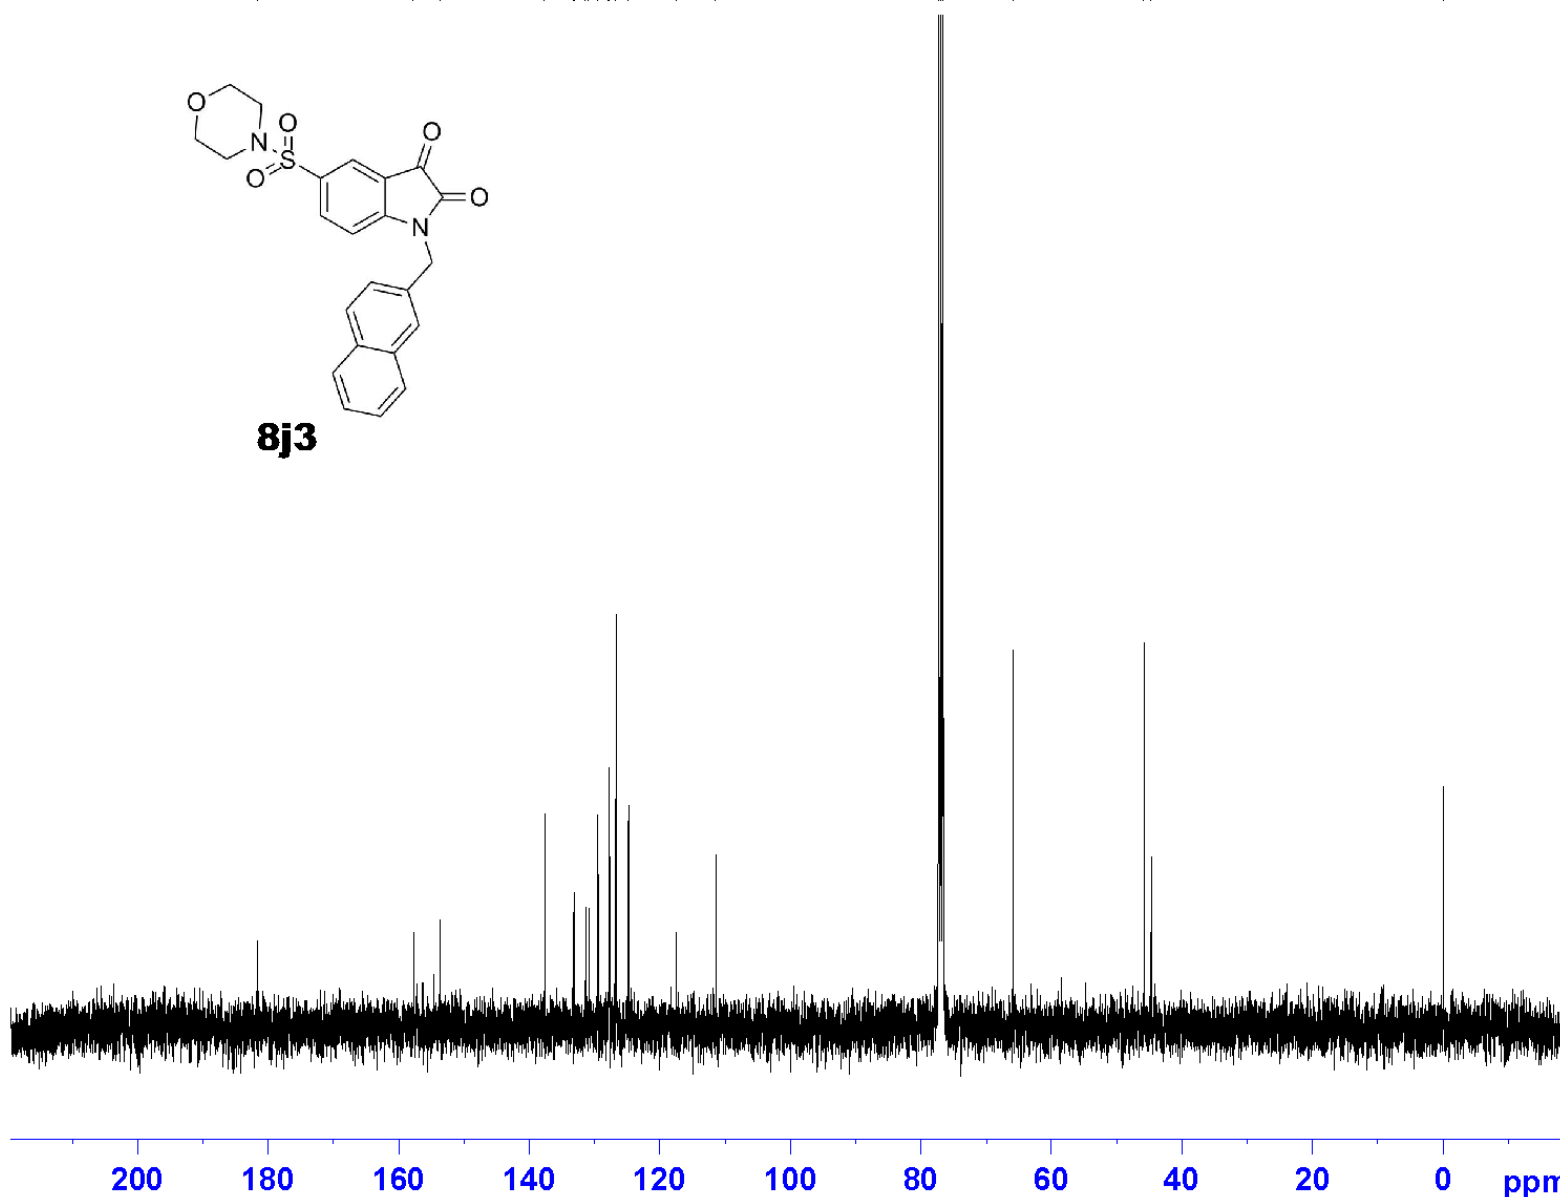

Current Data Parameters  
NAME ZHM-MANAI  
EXPNO 10  
PROCNO 1

F2 - Acquisition Parameters  
Date\_ 20121025  
Time 19.42  
INSTRUM spect  
PROBHD 5 mm PABBO BB-  
PULPROG zgpg30  
TD 65536  
SOLVENT CDCl3  
NS 1024  
DS 4  
SWH 24038.461 Hz  
FIDRES 0.366798 Hz  
AQ 1.3631988 sec  
RG 203  
DW 20.800 usec  
DE 6.50 usec  
TE 298.0 K  
D1 2.00000000 sec  
D11 0.03000000 sec

==== CHANNEL f1 =====  
NUC1 13C  
P1 9.65 usec  
PLW1 49.65900040 W  
SFO1 100.6228293 MHz

==== CHANNEL f2 =====  
CPDPRG2 waltz16  
NUC2 1H  
PCPD2 90.00 usec  
PLW2 12.85299969 W  
PLW12 0.34196001 W  
PLW13 0.27699000 W  
SFO2 400.1316005 MHz

F2 - Processing parameters  
SI 32768  
SF 100.6127690 MHz  
WDW EM  
SSB 0  
LB 1.00 Hz  
GB 0  
PC 1.40

S20121025-057

20121025

C13CPD CDCl3 D:\nmr\_data ham



Current Data Parameters  
NAME ZHM-4JIAJIA  
EXPNO 10  
PROCNO 1

F2 - Acquisition Parameters  
Date\_ 20121026  
Time 6.04  
INSTRUM spect  
PROBHD 5 mm PABBO BB-  
PULPROG zgpg30  
TD 65536  
SOLVENT CDCl3  
NS 1024  
DS 4  
SWH 24038.461 Hz  
FIDRES 0.366798 Hz  
AQ 1.3631988 sec  
RG 203  
DW 20.800 usec  
DE 6.50 usec  
TE 298.0 K  
D1 2.00000000 sec  
D11 0.03000000 sec

==== CHANNEL f1 =====  
NUC1 13C  
P1 9.65 usec  
PLW1 49.65900040 W  
SFO1 100.6228293 MHz

==== CHANNEL f2 =====  
CPDPRG2 waltz16  
NUC2 1H  
PCPD2 90.00 usec  
PLW2 12.85299969 W  
PLW12 0.34196001 W  
PLW13 0.27699000 W  
SFO2 400.1316005 MHz

F2 - Processing parameters  
SI 32768  
SF 100.6127690 MHz  
WDW EM  
SSB 0  
LB 1.00 Hz  
GB 0  
PC 1.40

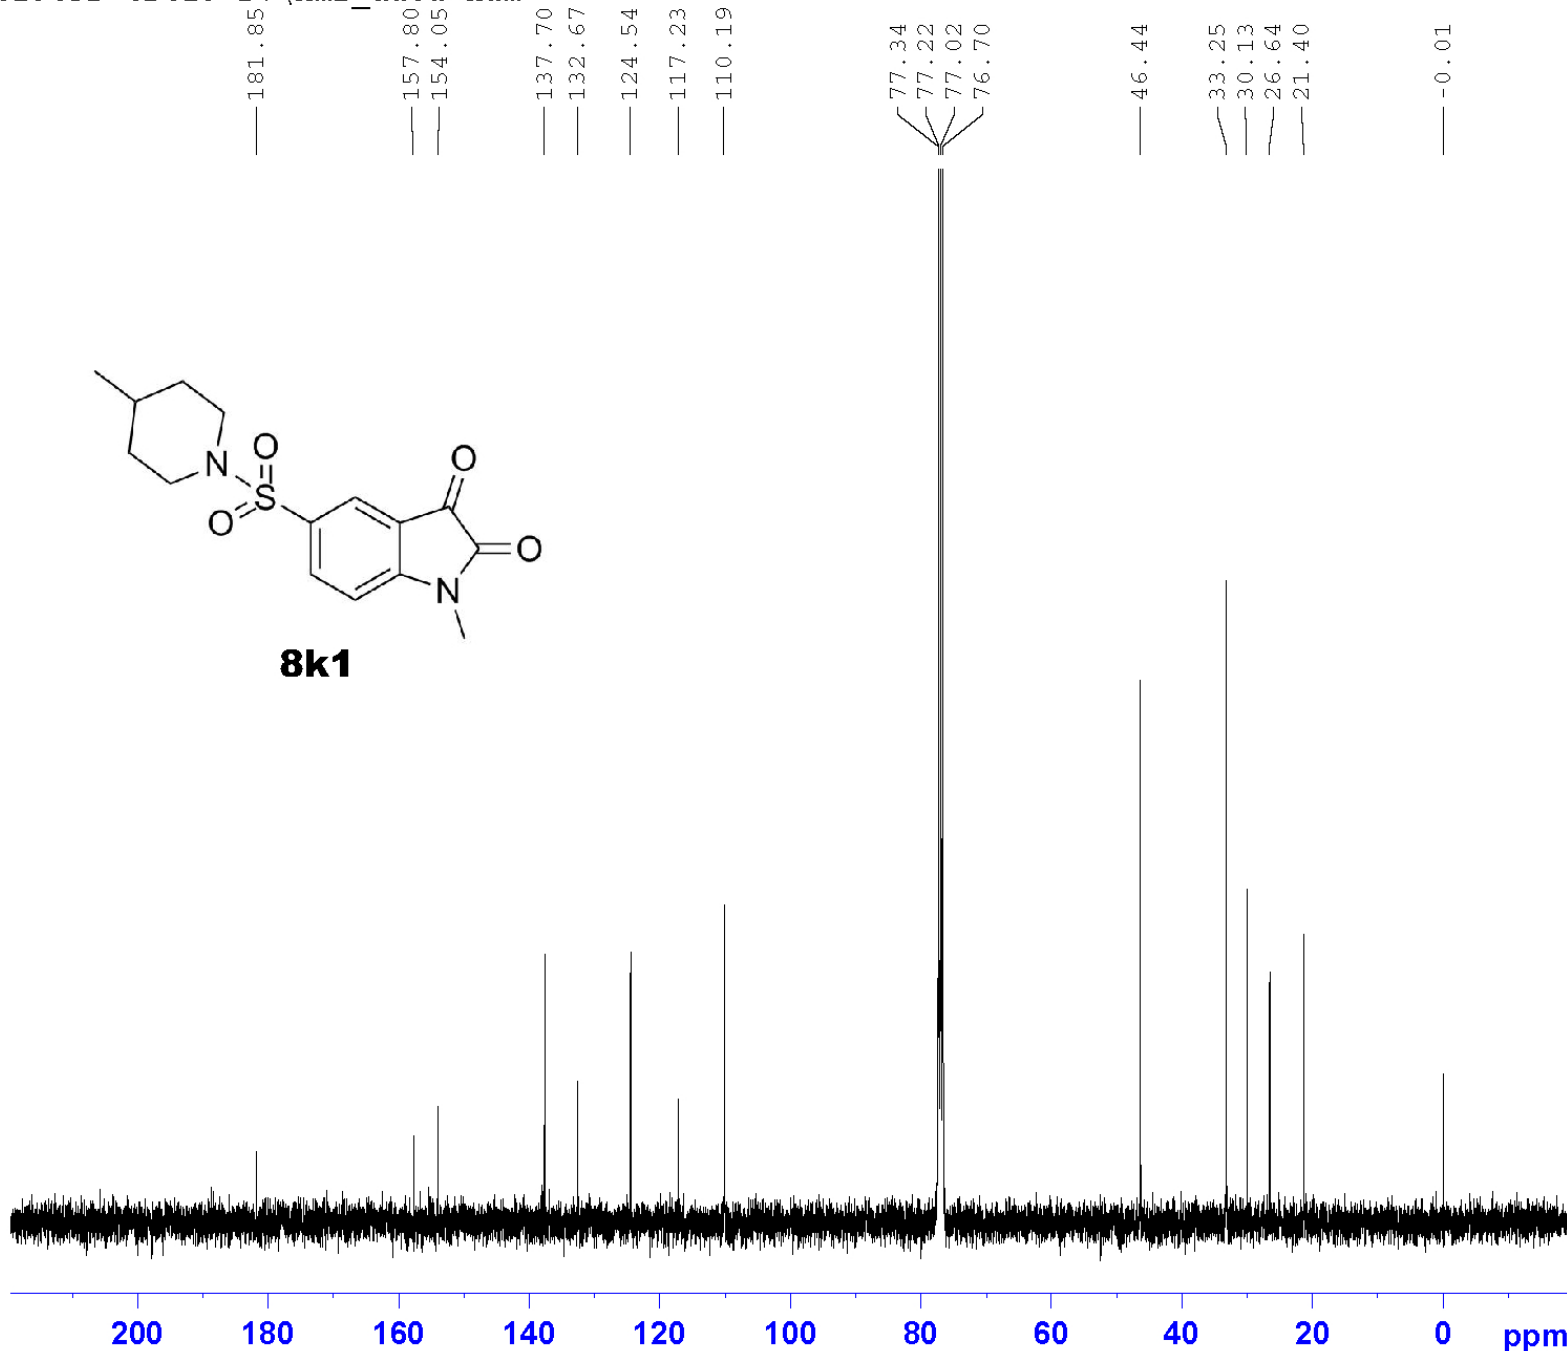

S20120709-016

20120709

C13CPD CDCl3 D:\nmr\_data ham

181.80  
157.82  
153.31  
137.54  
133.74  
132.83  
129.29  
128.59  
127.57  
124.66  
117.46  
111.18

77.33  
77.22  
77.02  
76.70

46.40  
44.50  
33.25  
30.09  
21.40

-0.01

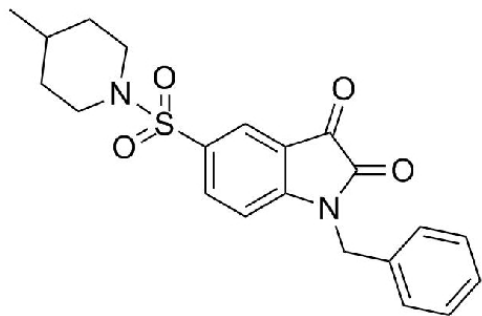

8k2

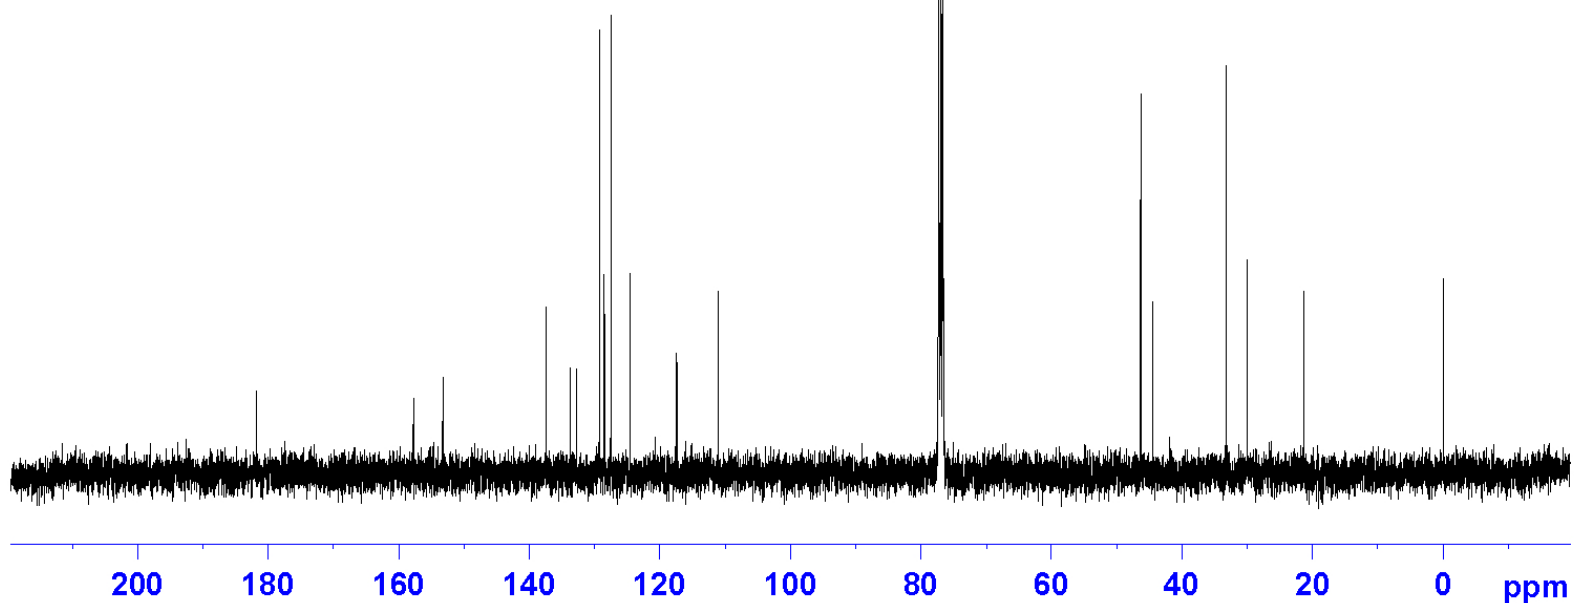

Current Data Parameters  
NAME ZHM-4JIABIAN  
EXPNO 10  
PROCNO 1

F2 - Acquisition Parameters  
Date\_ 20120709  
Time 20.24  
INSTRUM spect  
PROBHD 5 mm PABBO BB-  
PULPROG zgpg30  
TD 65536  
SOLVENT CDCl3  
NS 1024  
DS 4  
SWH 24038.461 Hz  
FIDRES 0.366798 Hz  
AQ 1.3631988 sec  
RG 203  
DW 20.800 usec  
DE 6.50 usec  
TE 298.0 K  
D1 2.00000000 sec  
D11 0.03000000 sec

==== CHANNEL f1 =====  
NUC1 13C  
P1 9.65 usec  
PLW1 49.65900040 W  
SFO1 100.6228293 MHz

==== CHANNEL f2 =====  
CPDPRG2 waltz16  
NUC2 1H  
PCPD2 90.00 usec  
PLW2 12.85299969 W  
PLW12 0.34196001 W  
PLW13 0.27699000 W  
SFO2 400.1316005 MHz

F2 - Processing parameters  
SI 32768  
SF 100.6127690 MHz  
WDW EM  
SSB 0  
LB 1.00 Hz  
GB 0  
PC 1.40

S20121115-054

20121115

C13CPD CDCl3 D:\nmr data ham



Current Data Parameters  
NAME ZHM-4JIANAI  
EXPNO 10  
PROCNO 1

F2 - Acquisition Parameters  
Date\_ 20121122  
Time 3.26  
INSTRUM spect  
PROBHD 5 mm PABBO BB-  
PULPROG zgpg30  
TD 65536  
SOLVENT CDCl3  
NS 1024  
DS 4  
SWH 24038.461 Hz  
FIDRES 0.366798 Hz  
AQ 1.3631988 sec  
RG 203  
DW 20.800 usec  
DE 6.50 usec  
TE 299.4 K  
D1 2.00000000 sec  
D11 0.03000000 sec

==== CHANNEL f1 =====  
NUC1 13C  
P1 9.65 usec  
PLW1 49.65900040 W  
SFO1 100.6228293 MHz

==== CHANNEL f2 =====  
CPDPRG2 waltz16  
NUC2 1H  
PCPD2 90.00 usec  
PLW2 12.85299969 W  
PLW12 0.34196001 W  
PLW13 0.27699000 W  
SFO2 400.1316005 MHz

F2 - Processing parameters  
SI 32768  
SF 100.6127690 MHz  
WDW EM  
SSB 0  
LB 1.00 Hz  
GB 0  
PC 1.40

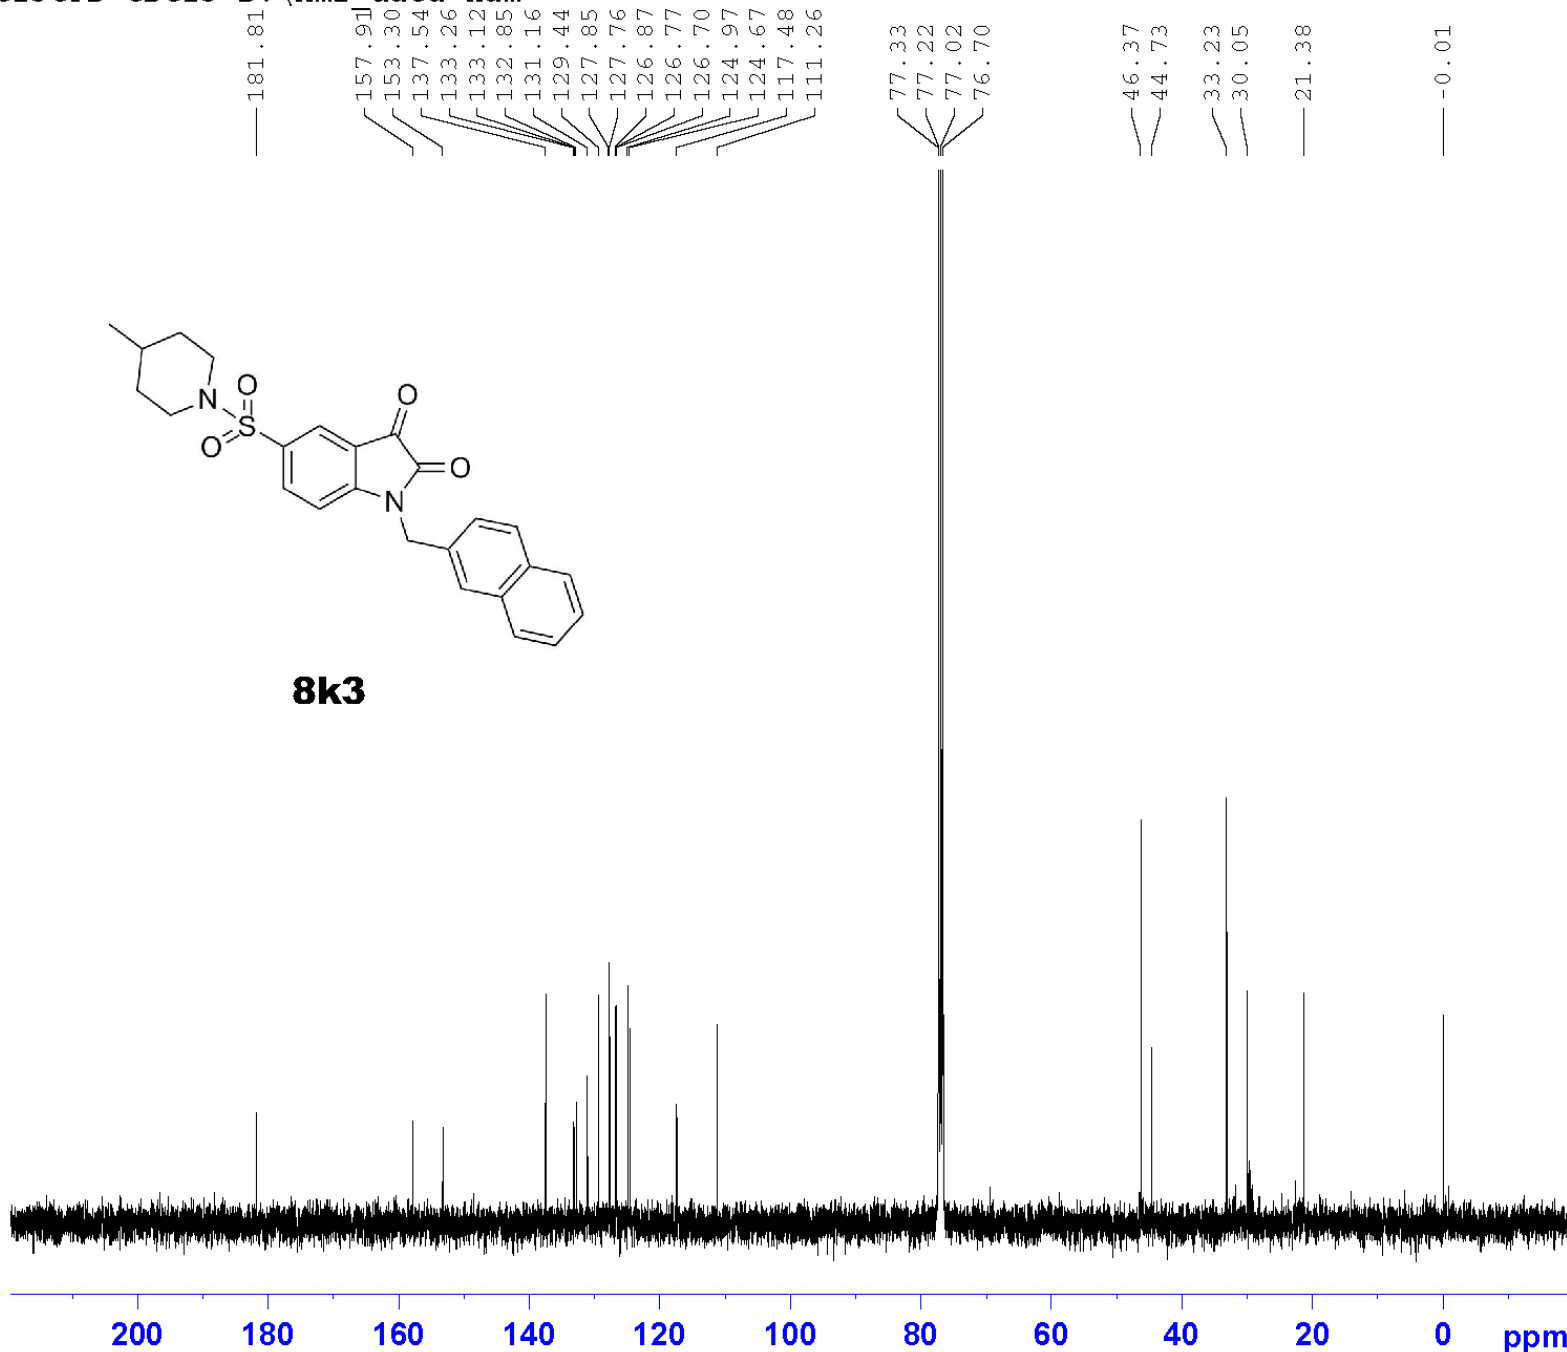

S20121115-046

20121115

C13CPD CDCl3 D:\nmr\_data ham

181.90  
157.80  
154.04  
137.65  
137.60  
132.75  
124.45  
117.25  
110.24

77.34  
77.22  
77.02  
76.70

52.78  
52.56  
41.30  
38.24  
30.94  
30.92  
29.69  
26.69  
26.62  
18.96  
18.44  
18.14

-0.01

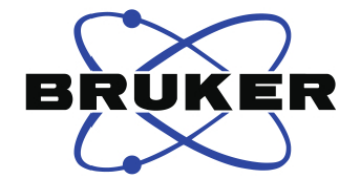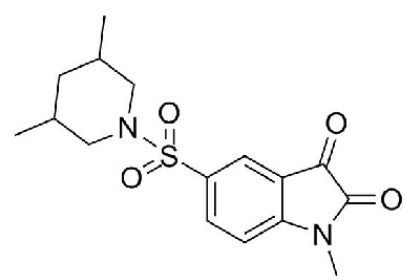

8m1

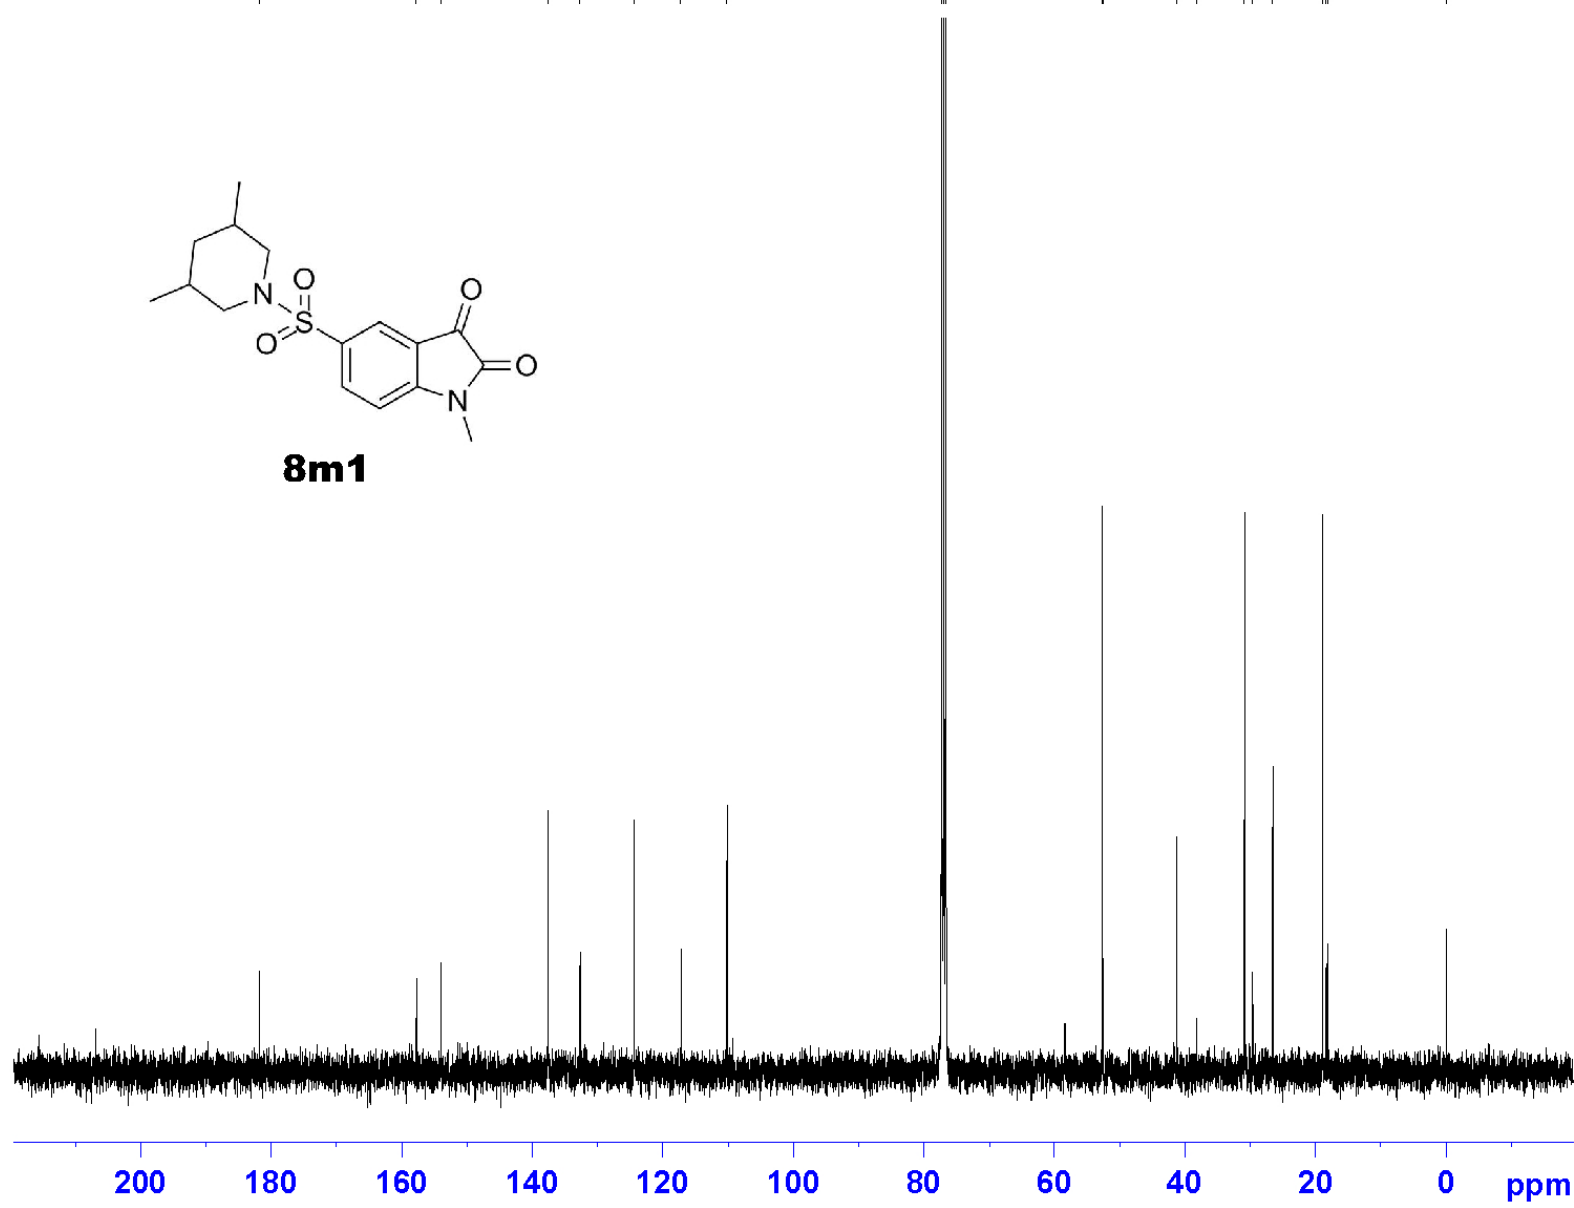

Current Data Parameters  
NAME ZHM-3.5ERJIAJIA  
EXPNO 10  
PROCNO 1

F2 - Acquisition Parameters  
Date\_ 20121121  
Time 19.04  
INSTRUM spect  
PROBHD 5 mm PABBO BB-  
PULPROG zgpg30  
TD 65536  
SOLVENT CDCl3  
NS 1024  
DS 4  
SWH 24038.461 Hz  
FIDRES 0.366798 Hz  
AQ 1.3631988 sec  
RG 203  
DW 20.800 usec  
DE 6.50 usec  
TE 299.8 K  
D1 2.00000000 sec  
D11 0.03000000 sec

==== CHANNEL f1 =====  
NUC1 13C  
P1 9.65 usec  
PLW1 49.65900040 W  
SFO1 100.6228293 MHz

==== CHANNEL f2 =====  
CPDPRG2 waltz16  
NUC2 1H  
PCPD2 90.00 usec  
PLW2 12.85299969 W  
PLW12 0.34196001 W  
PLW13 0.27699000 W  
SFO2 400.1316005 MHz

F2 - Processing parameters  
SI 32768  
SF 100.6127690 MHz  
WDW EM  
SSB 0  
LB 1.00 Hz  
GB 0  
PC 1.40



S20121115-052

20121115

C13CPD CDCl3 D:\nmr\_data ham

206.98  
181.87  
157.85  
153.33  
137.47  
133.81  
132.89  
129.27  
128.56  
127.61  
124.54  
117.47  
111.26

77.36  
77.24  
77.04  
76.72  
52.69  
52.48  
44.50  
41.25  
30.96  
30.91  
18.94  
-0.01

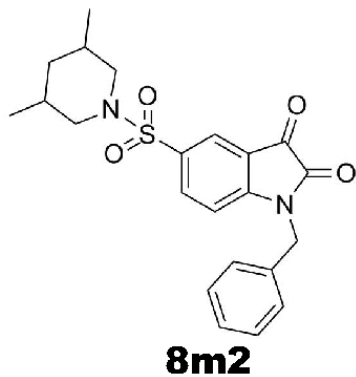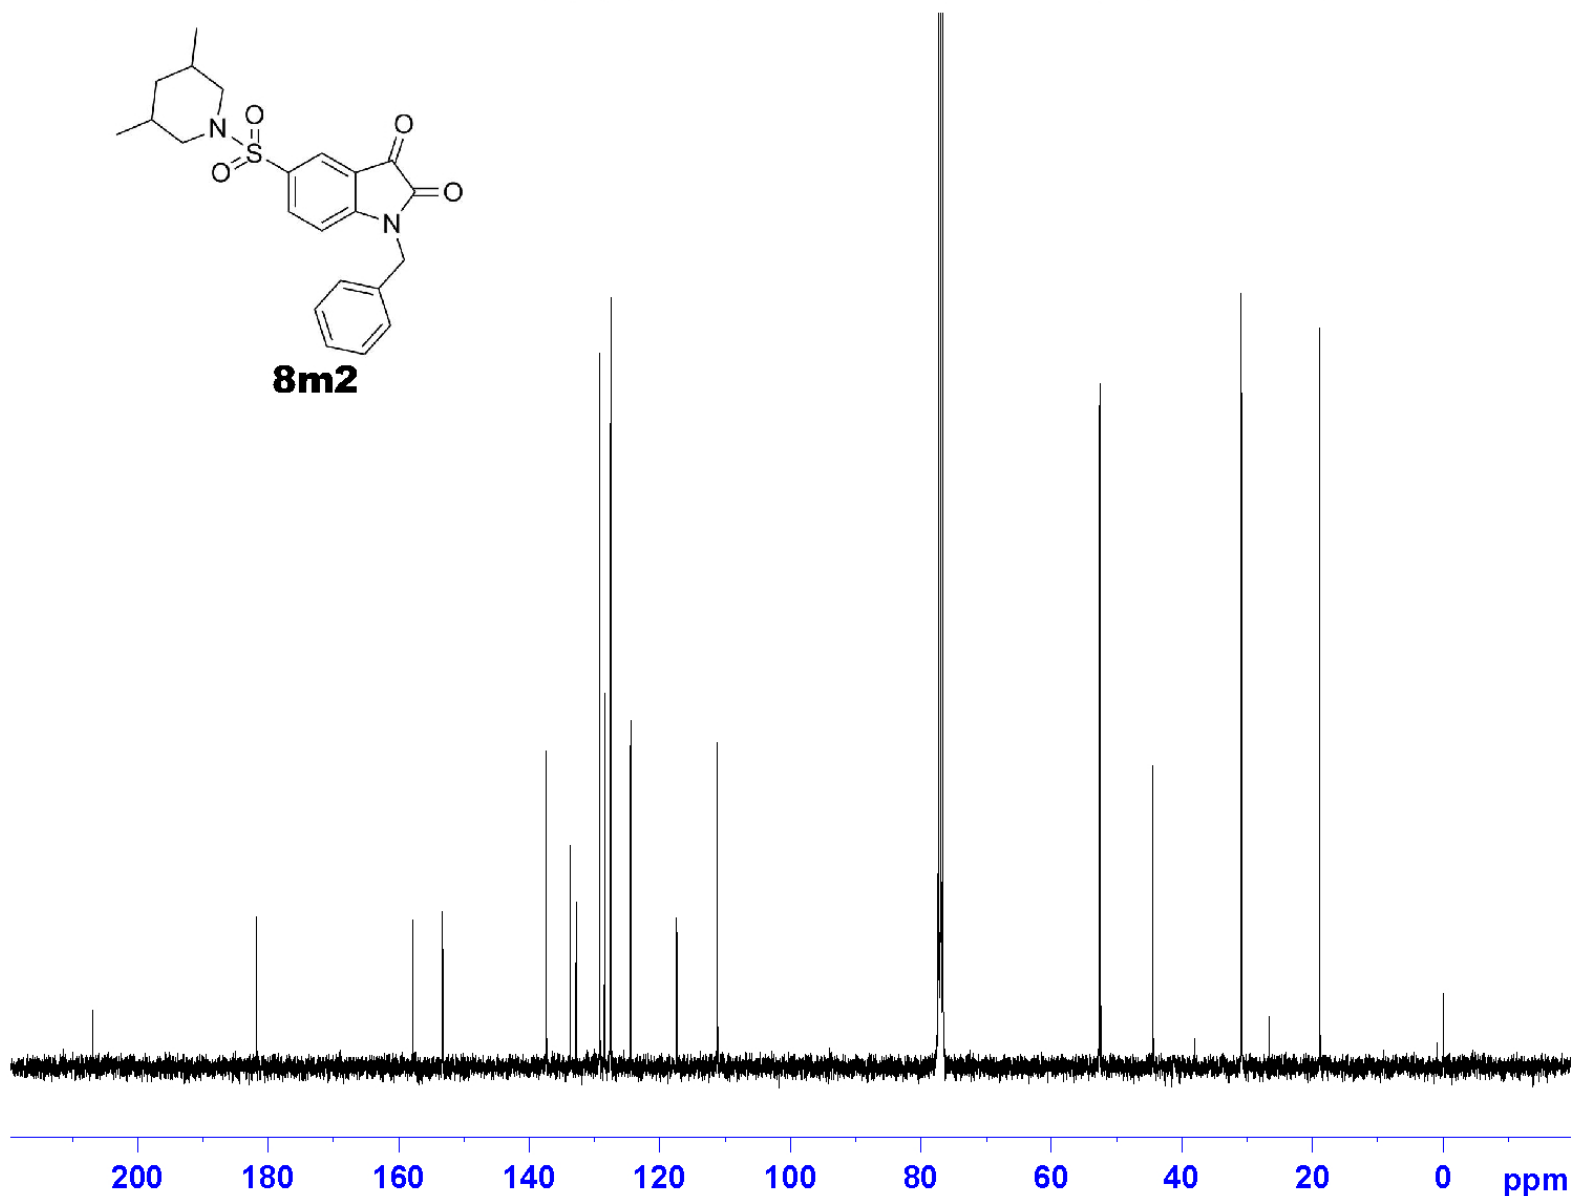

Current Data Parameters  
NAME ZHM-3.5ERJIABIAN  
EXPNO 10  
PROCNO 1

F2 - Acquisition Parameters  
Date\_ 20121122  
Time 1.19  
INSTRUM spect  
PROBHD 5 mm PABBO BB-  
PULPROG zgpg30  
TD 65536  
SOLVENT CDCl3  
NS 1024  
DS 4  
SWH 24038.461 Hz  
FIDRES 0.366798 Hz  
AQ 1.3631988 sec  
RG 203  
DW 20.800 usec  
DE 6.50 usec  
TE 299.7 K  
D1 2.00000000 sec  
D11 0.03000000 sec

==== CHANNEL f1 =====  
NUC1 13C  
P1 9.65 usec  
PLW1 49.65900040 W  
SFO1 100.6228293 MHz

==== CHANNEL f2 =====  
CPDPRG2 waltz16  
NUC2 1H  
PCPD2 90.00 usec  
PLW2 12.85299969 W  
PLW12 0.34196001 W  
PLW13 0.27699000 W  
SFO2 400.1316005 MHz

F2 - Processing parameters  
SI 32768  
SF 100.6127690 MHz  
WDW EM  
SSB 0  
LB 1.00 Hz  
GB 0  
PC 1.40

S20121025-050

20121025

C13CPD CDC13 D:\nmr data ham

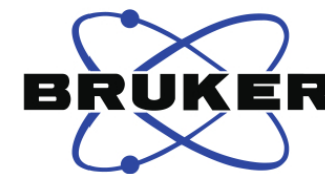

181.86  
157.92  
153.30  
137.49  
133.25  
133.12  
132.99  
131.19  
129.44  
127.85  
127.75  
126.90  
126.80  
126.72  
125.00  
124.63  
117.49  
111.30

77.33  
77.22  
77.02  
76.70

52.68

44.75  
41.23

30.96

18.93

-0.00

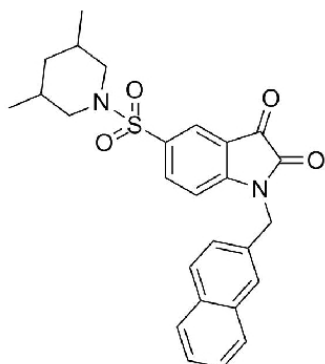

8m3

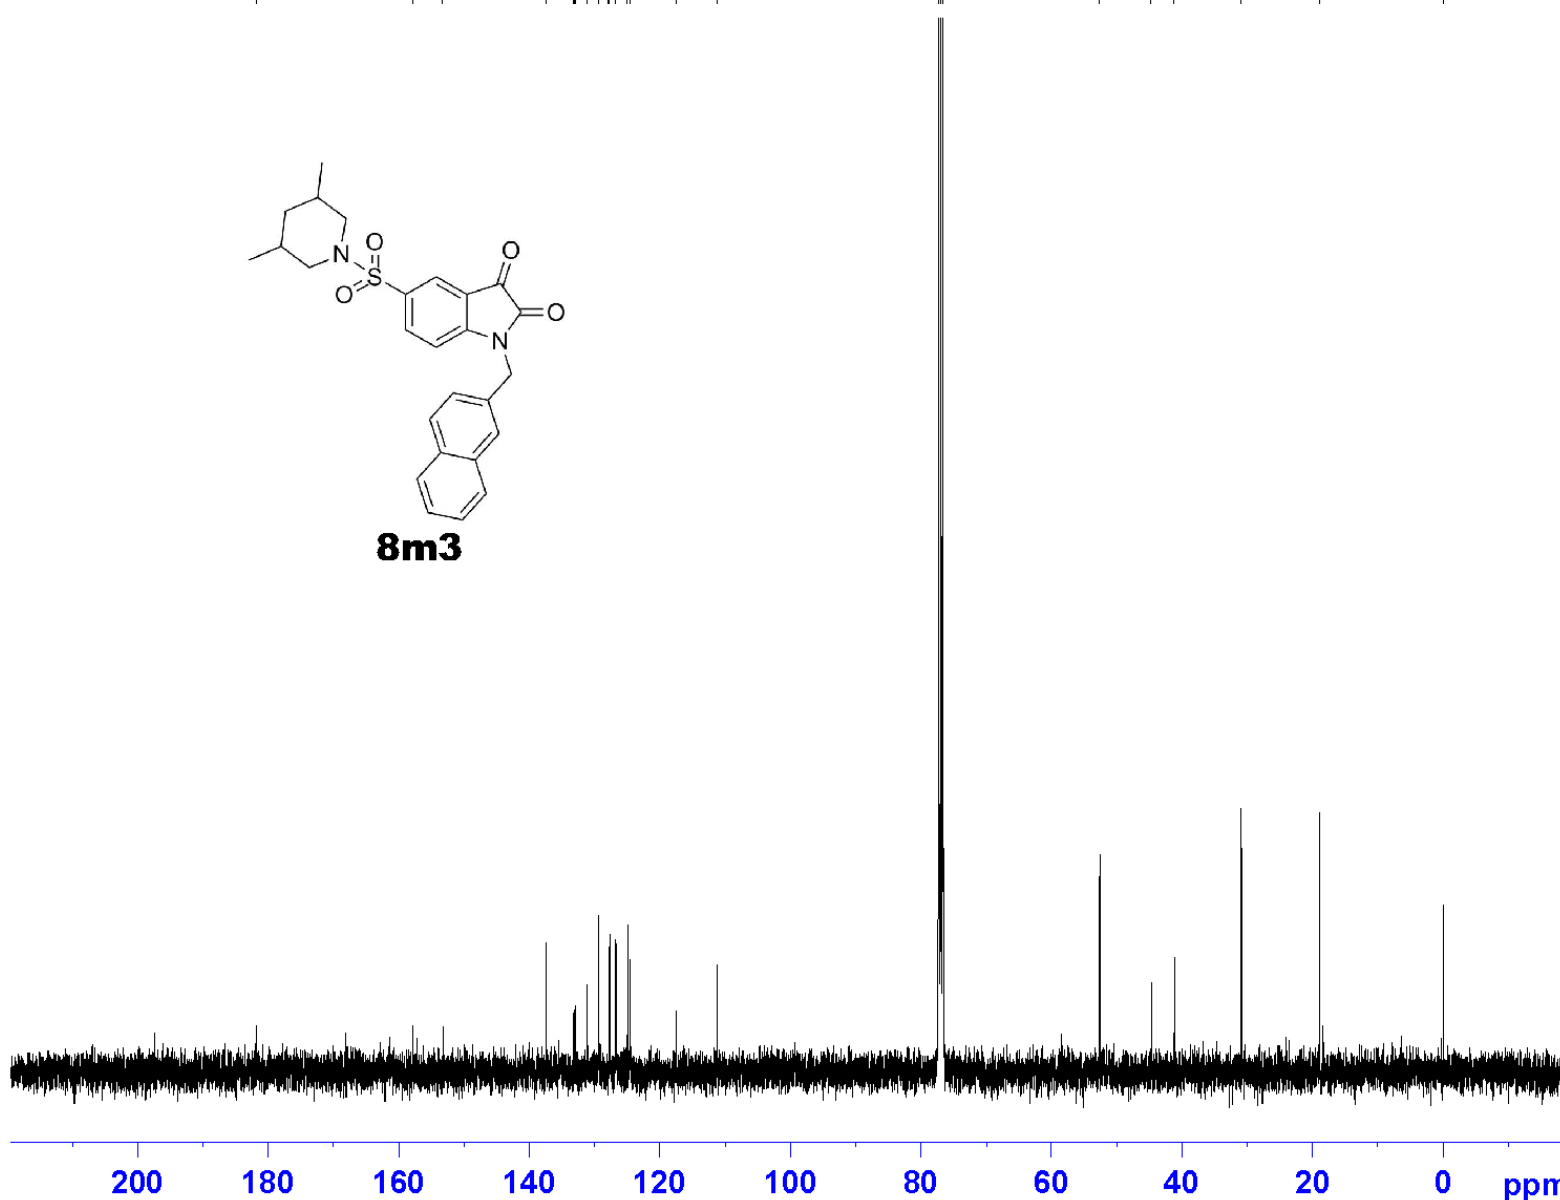

Current Data Parameters  
NAME ZHM-3.5-ERJIANAI  
EXPNO 10  
PROCNO 1

F2 - Acquisition Parameters  
Date\_ 20121025  
Time 22.49  
INSTRUM spect  
PROBHD 5 mm PABBO BB-  
PULPROG zgpg30  
TD 65536  
SOLVENT CDC13  
NS 1024  
DS 4  
SWH 24038.461 Hz  
FIDRES 0.366798 Hz  
AQ 1.3631988 sec  
RG 203  
DW 20.800 usec  
DE 6.50 usec  
TE 298.0 K  
D1 2.00000000 sec  
D11 0.03000000 sec

==== CHANNEL f1 =====  
NUC1 13C  
P1 9.65 usec  
PLW1 49.65900040 W  
SFO1 100.6228293 MHz

==== CHANNEL f2 =====  
CPDPRG2 waltz16  
NUC2 1H  
PCPD2 90.00 usec  
PLW2 12.85299969 W  
PLW12 0.34196001 W  
PLW13 0.27699000 W  
SFO2 400.1316005 MHz

F2 - Processing parameters  
SI 32768  
SF 100.6127690 MHz  
WDW EM  
SSB 0  
LB 1.00 Hz  
GB 0  
PC 1.40
